# Supplementary material for: Polygenic basis and biomedical consequences of telomere length variation
Source: PubMed Central journal article supplement (PMC8492471; doi:10.1038/s41588-021-00944-6), 2021-10-05

# Regional association plots for GWAS sentinels.

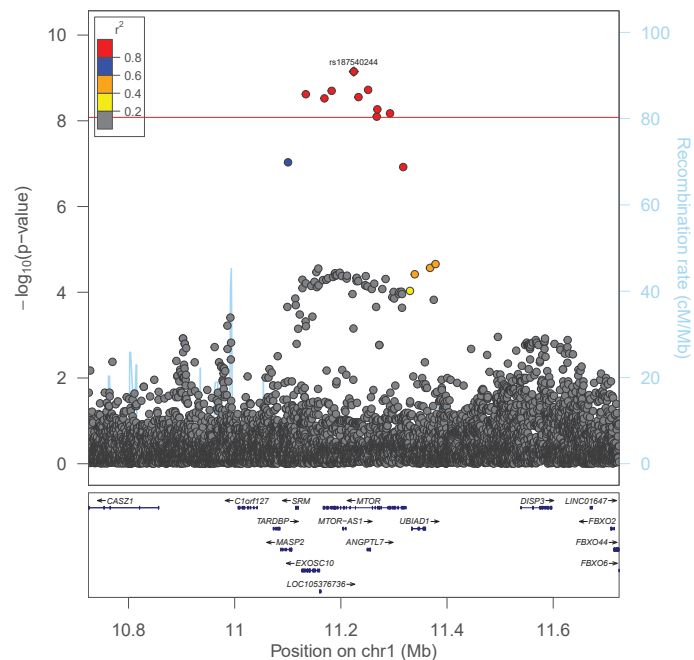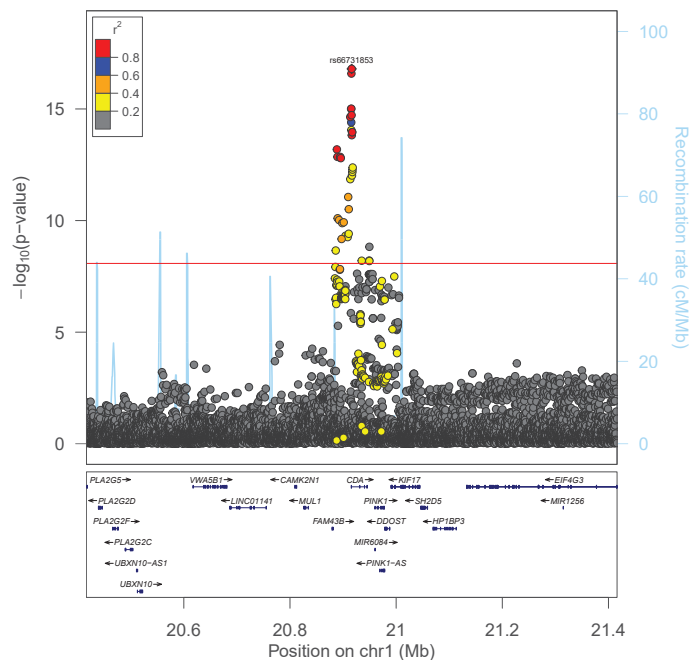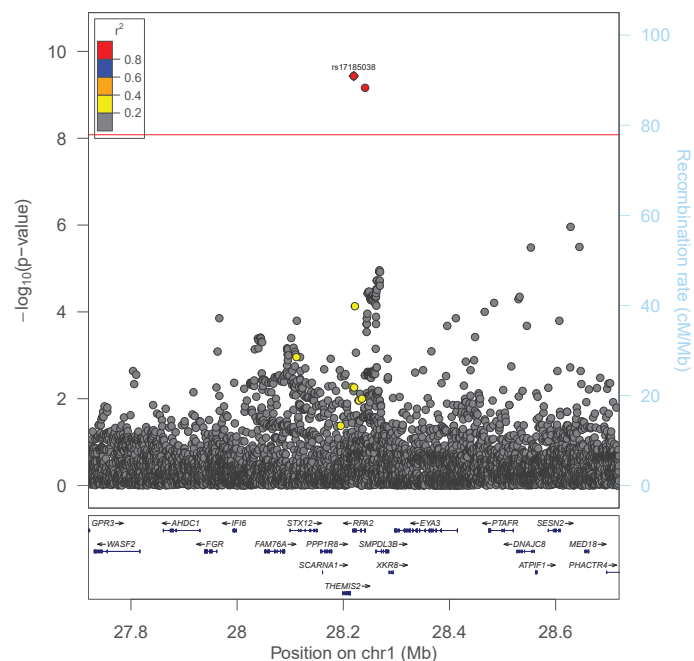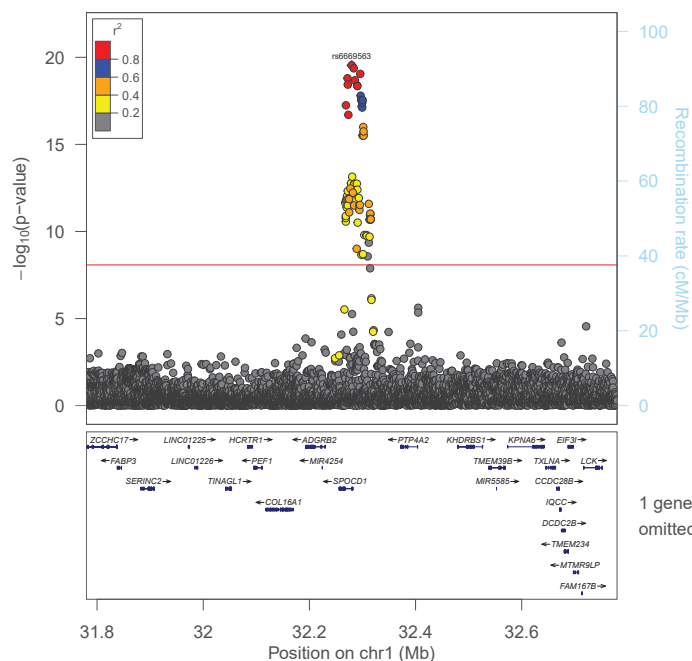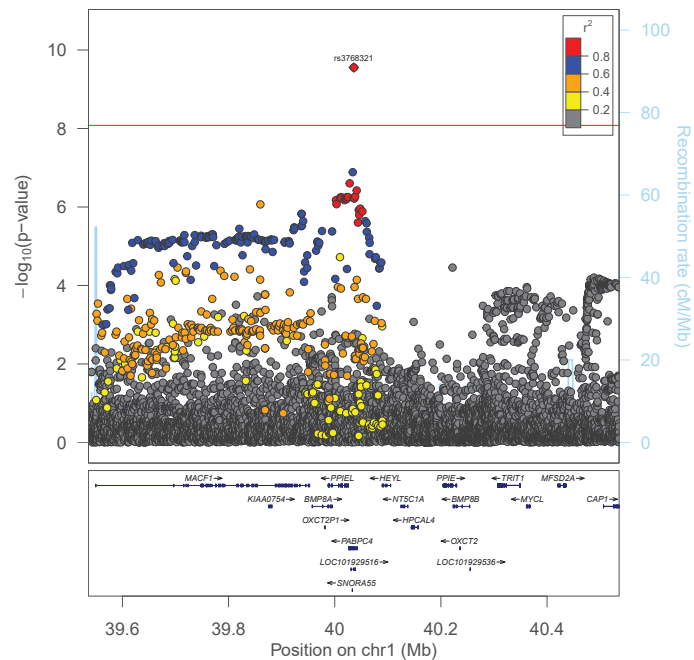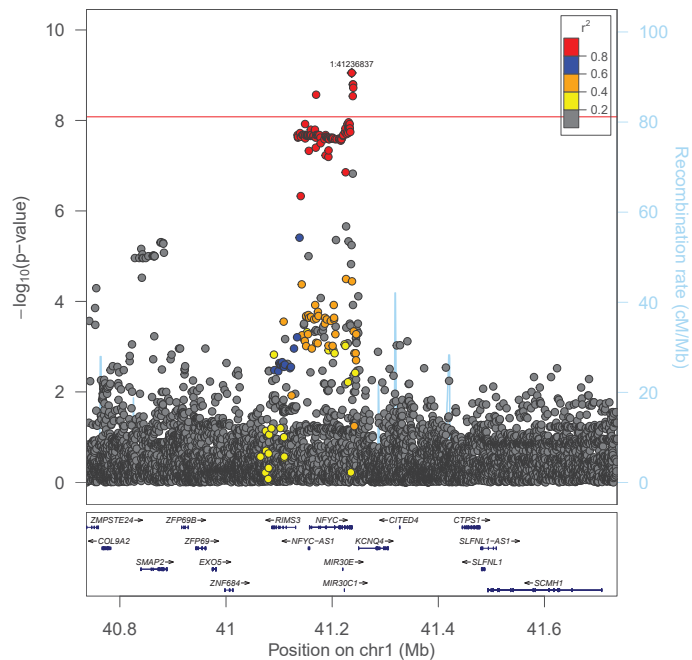

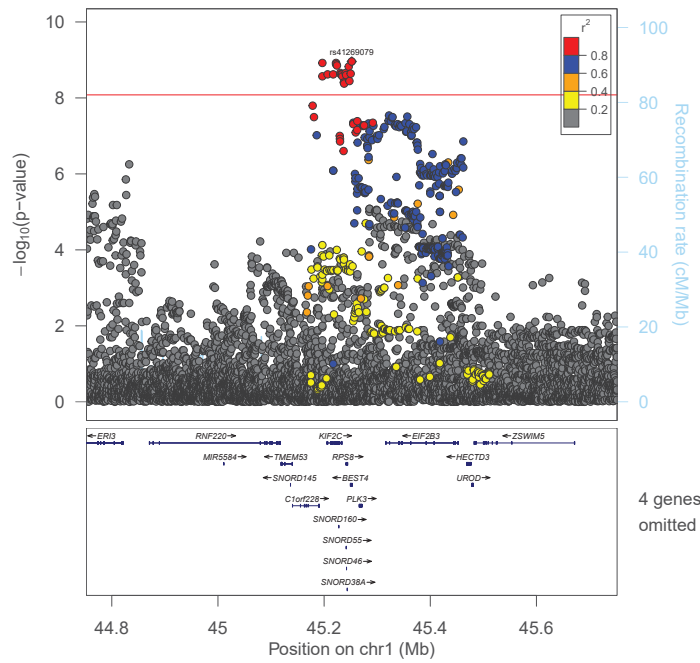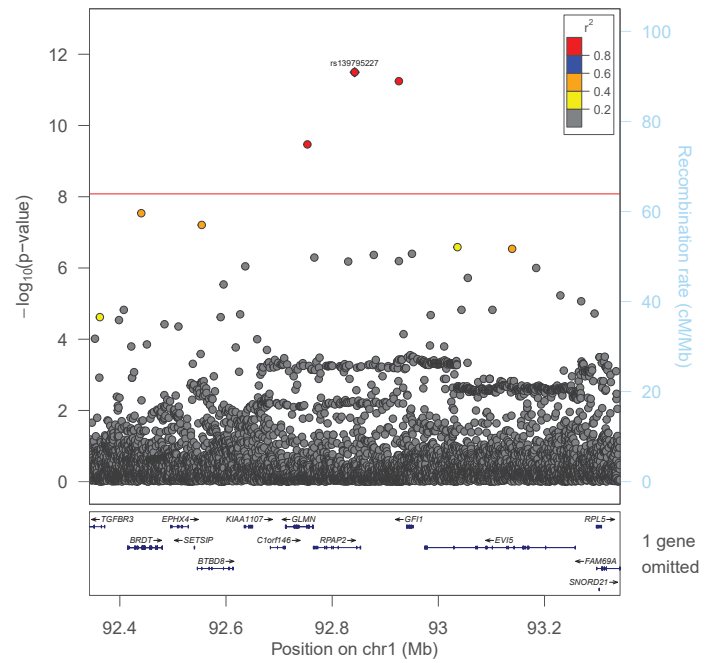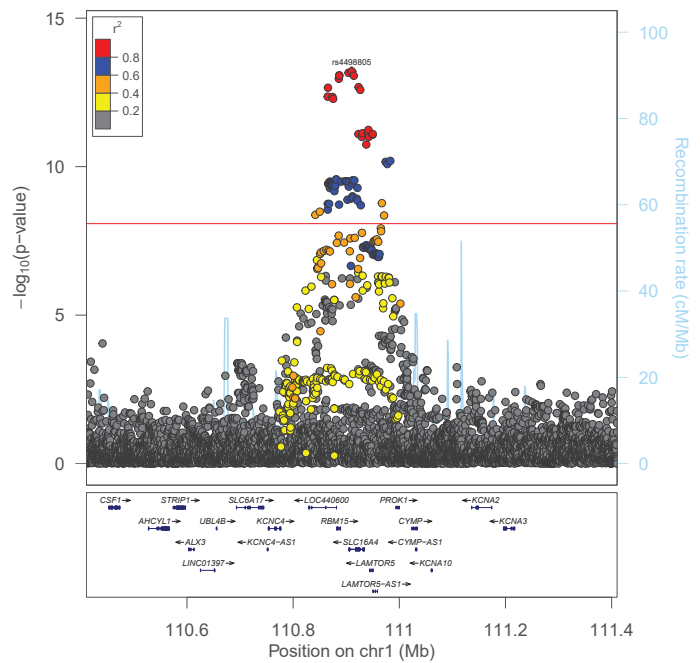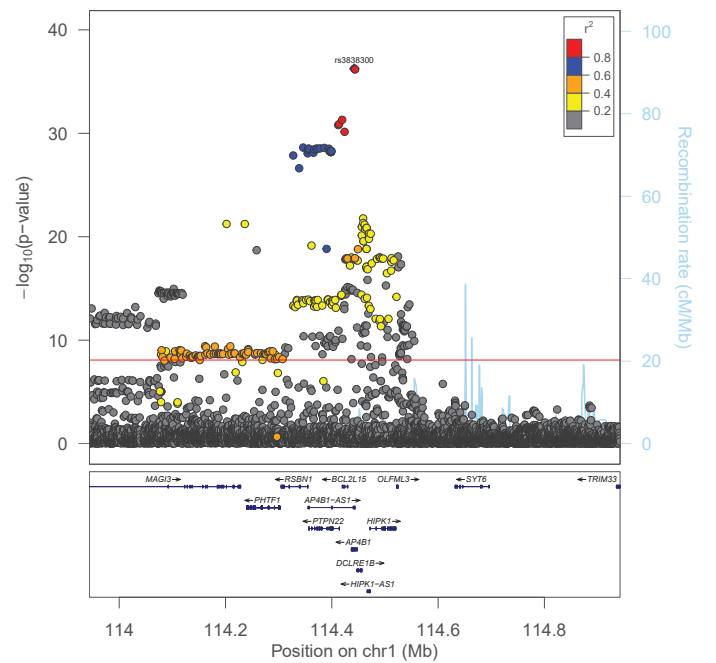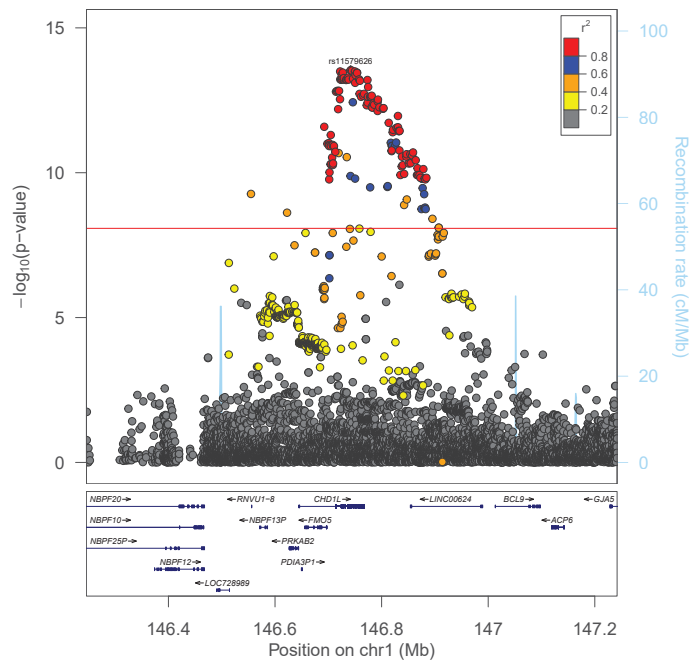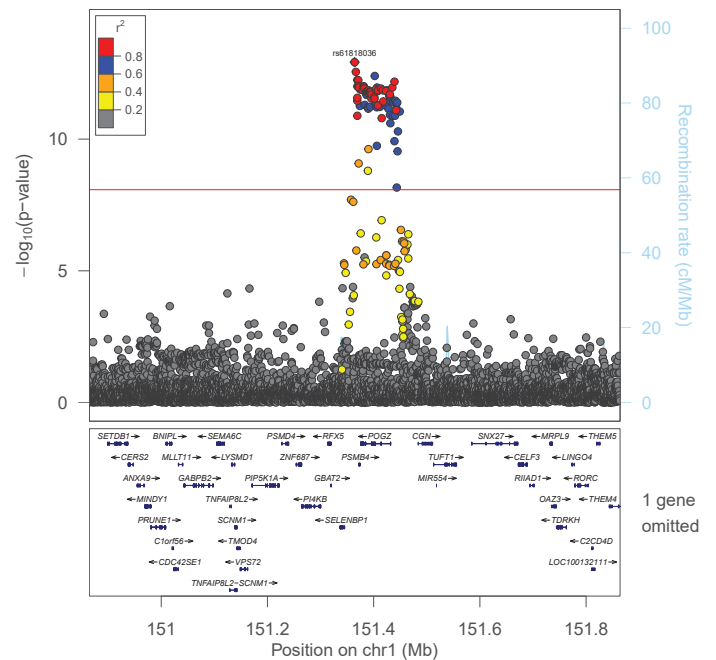

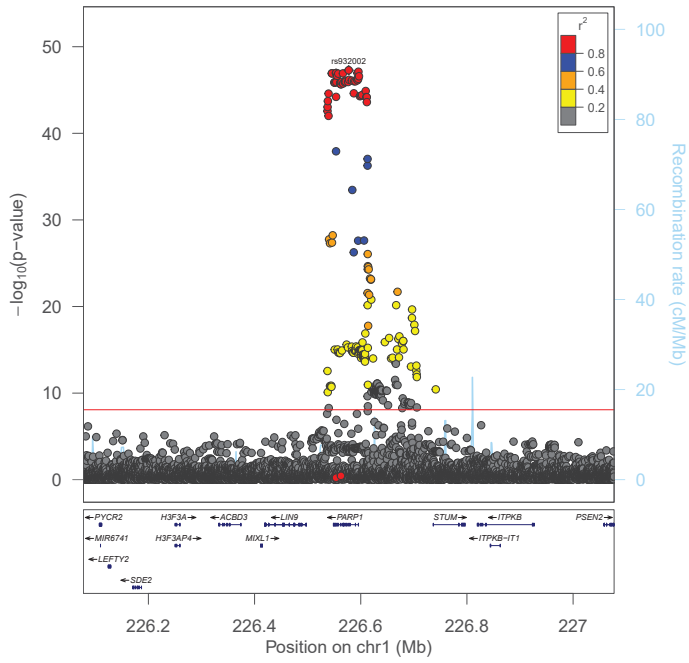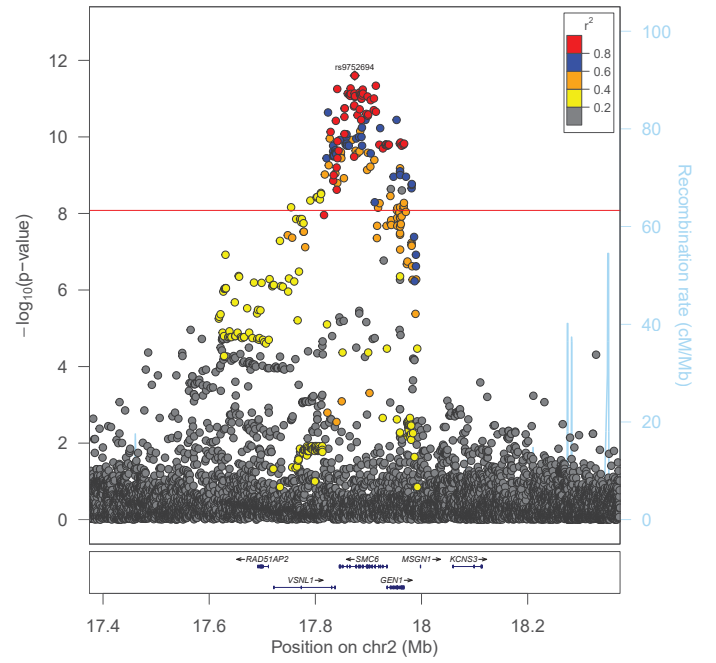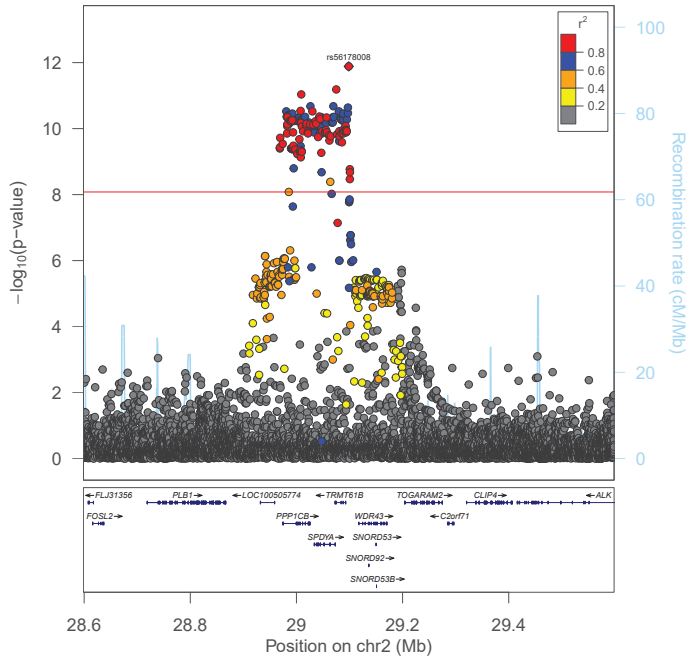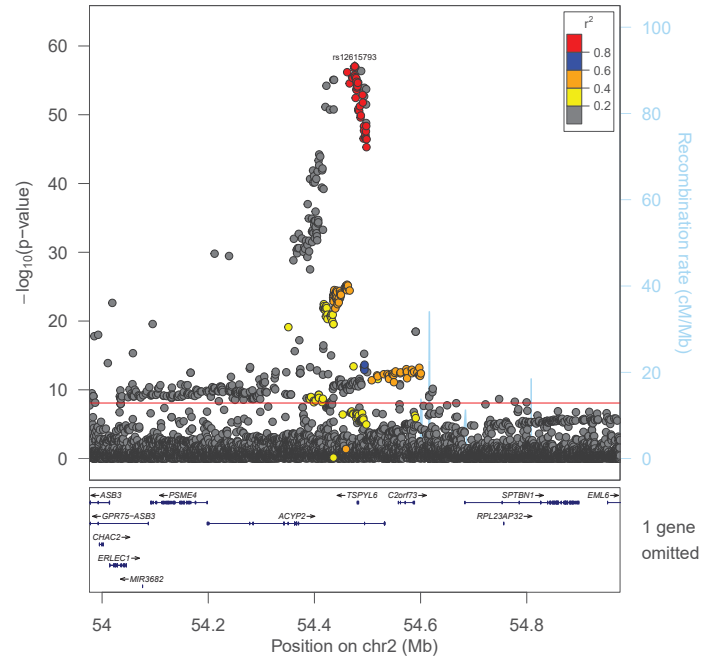

1 gene omitted

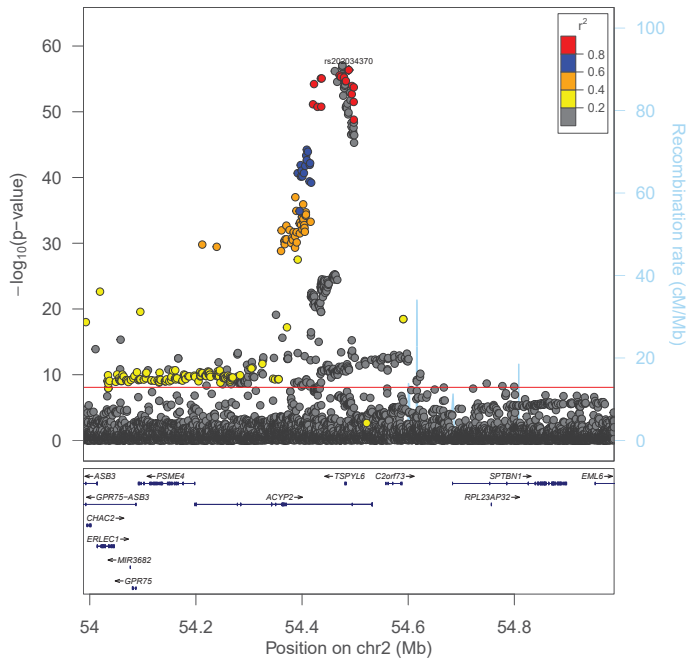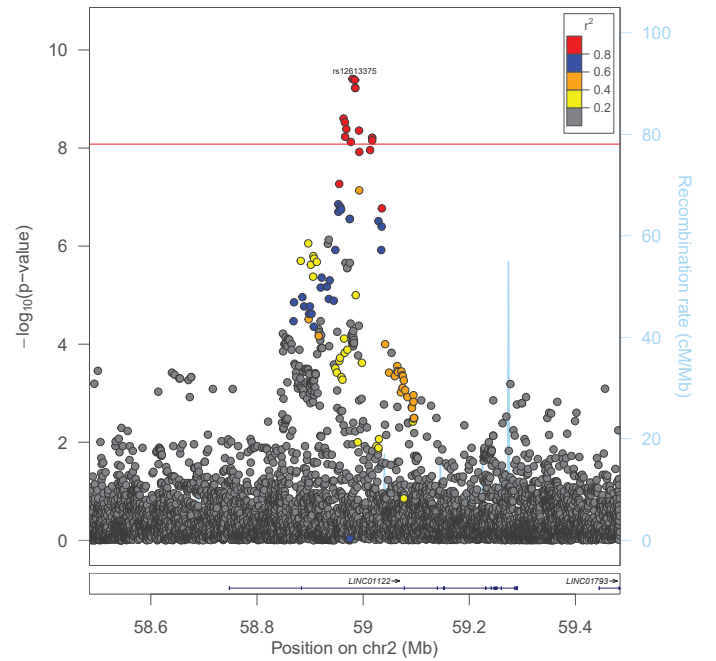

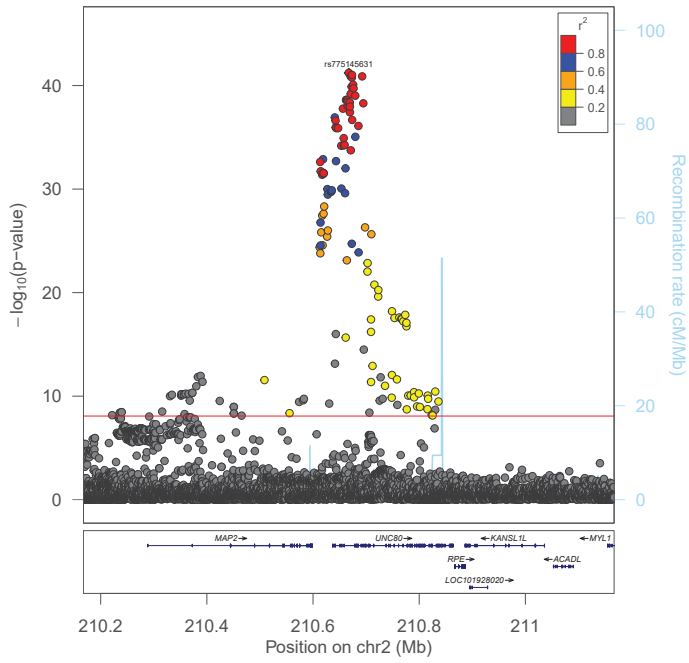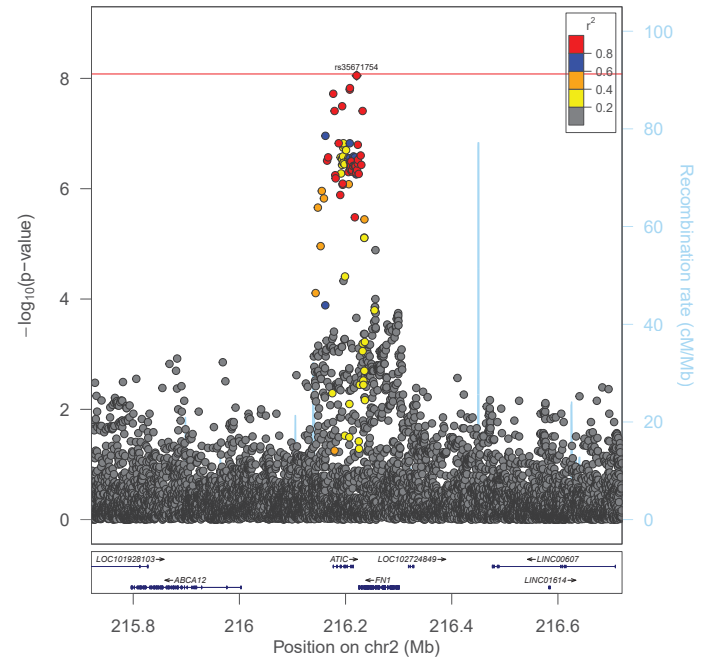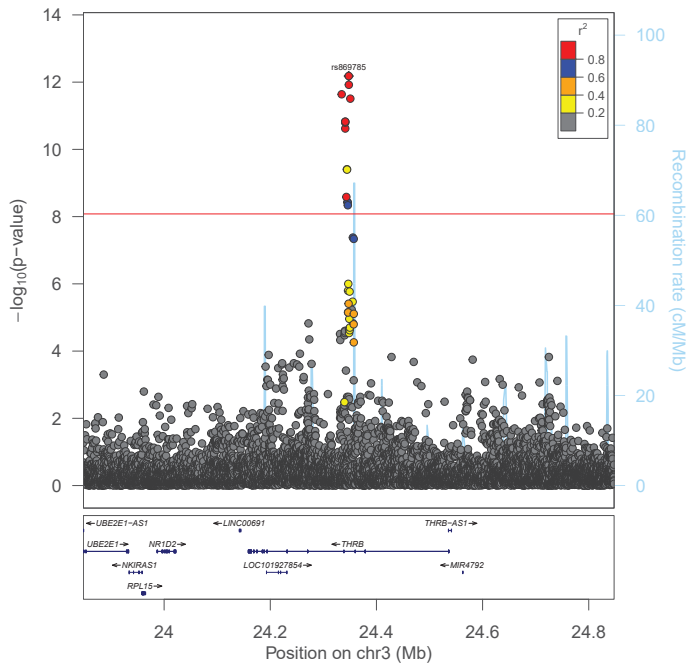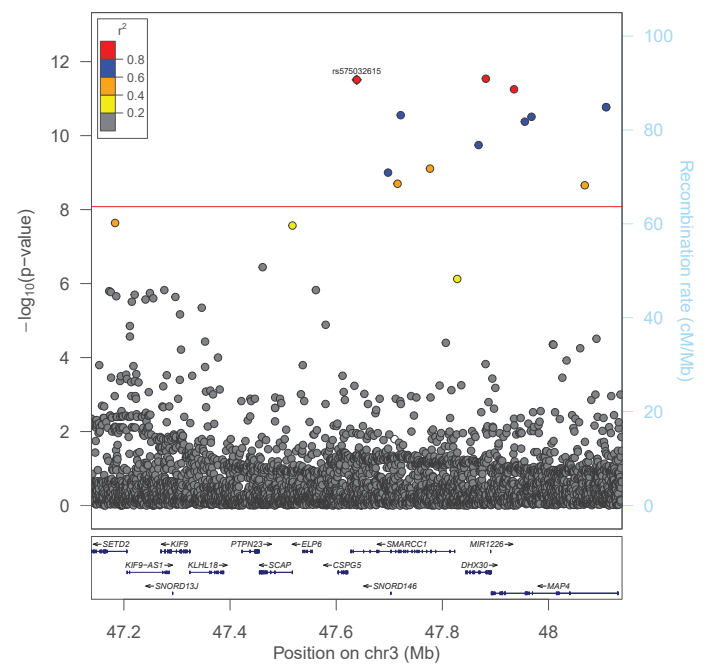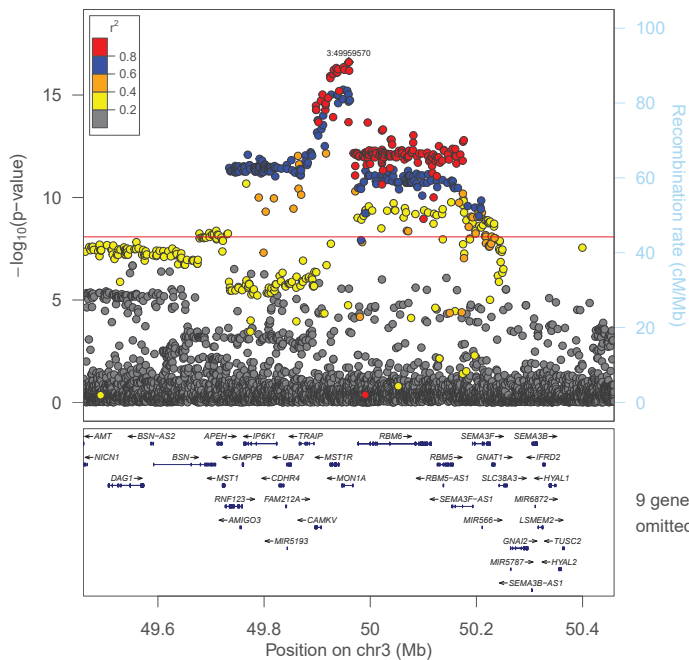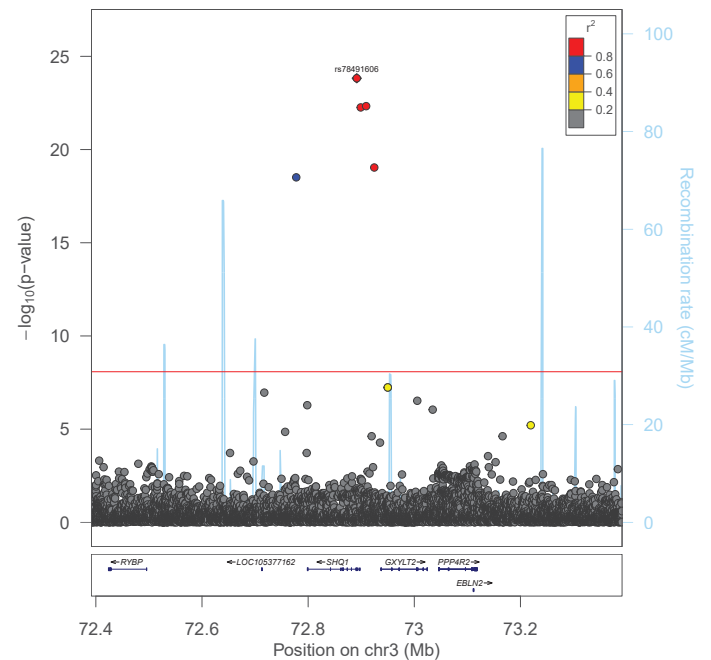

9 genes omitted



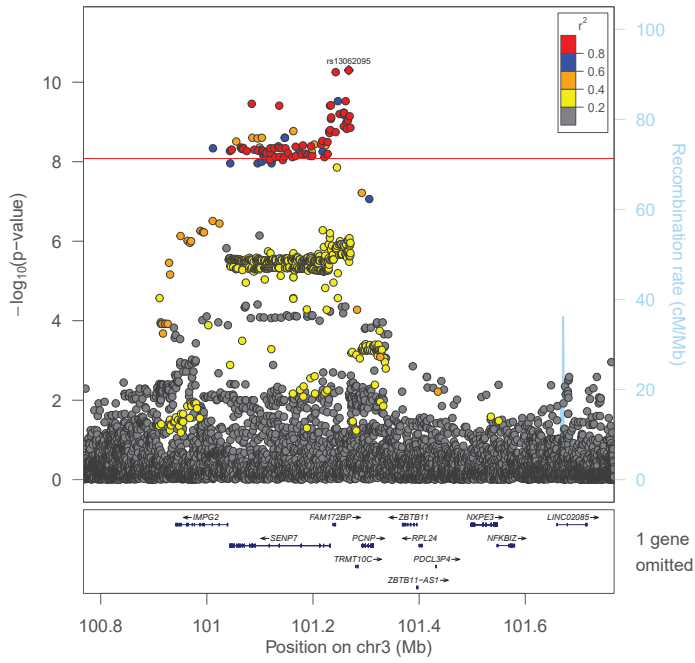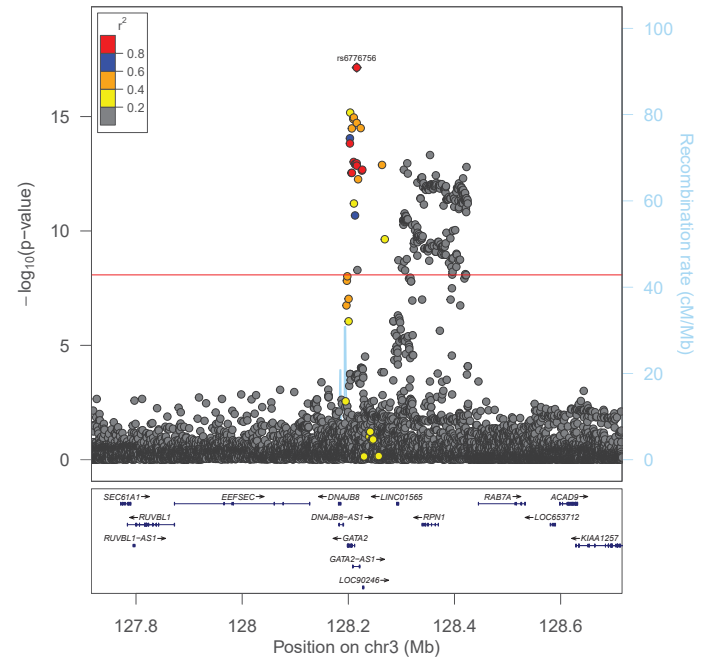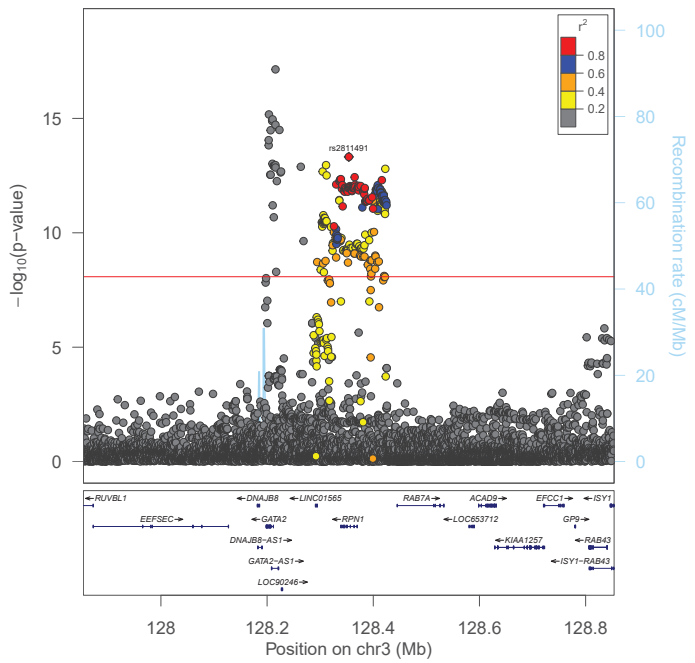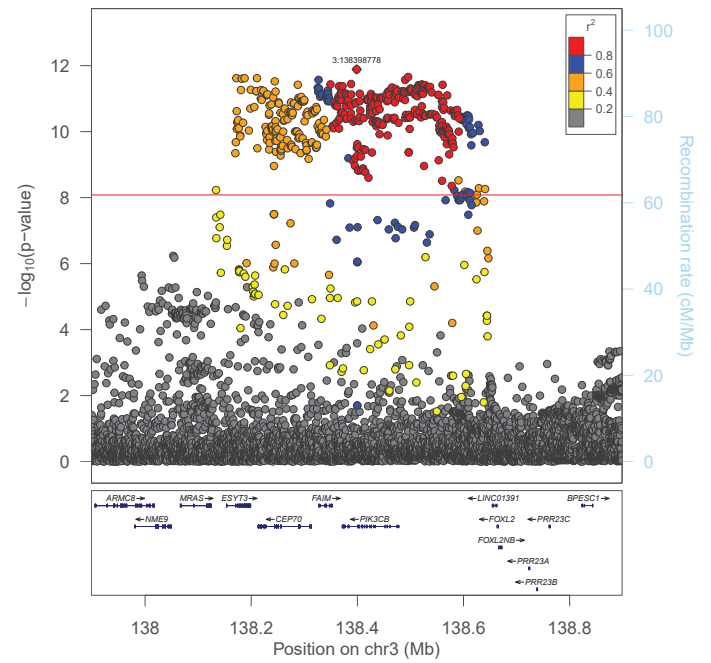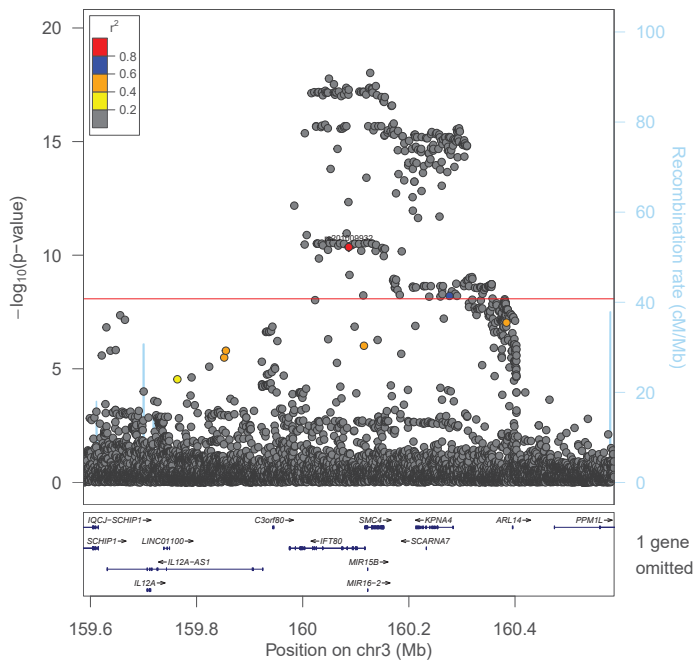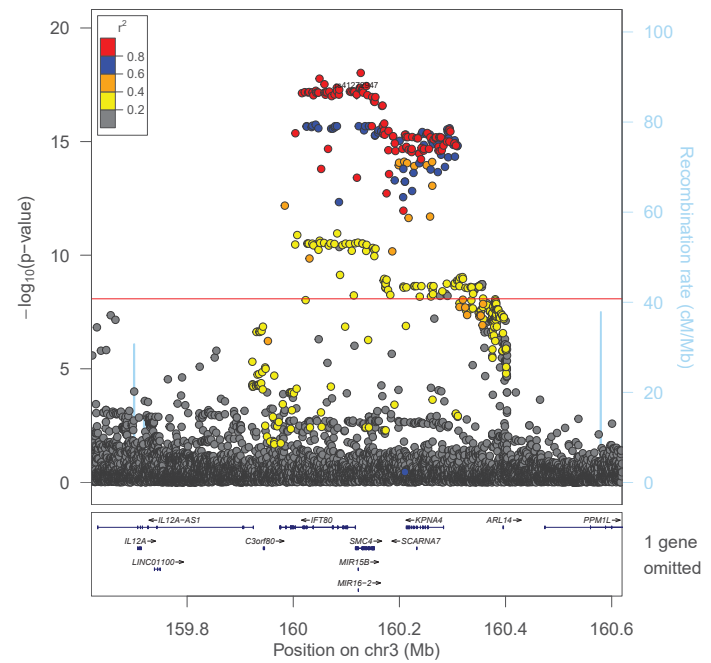

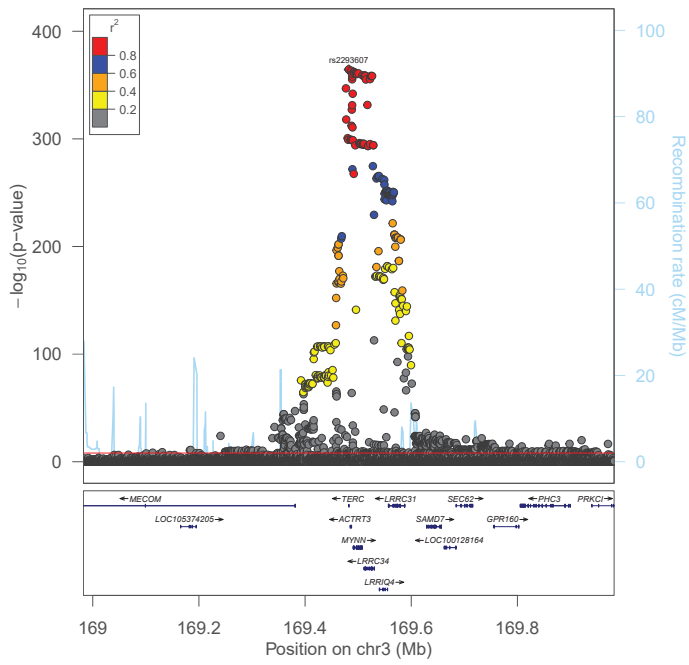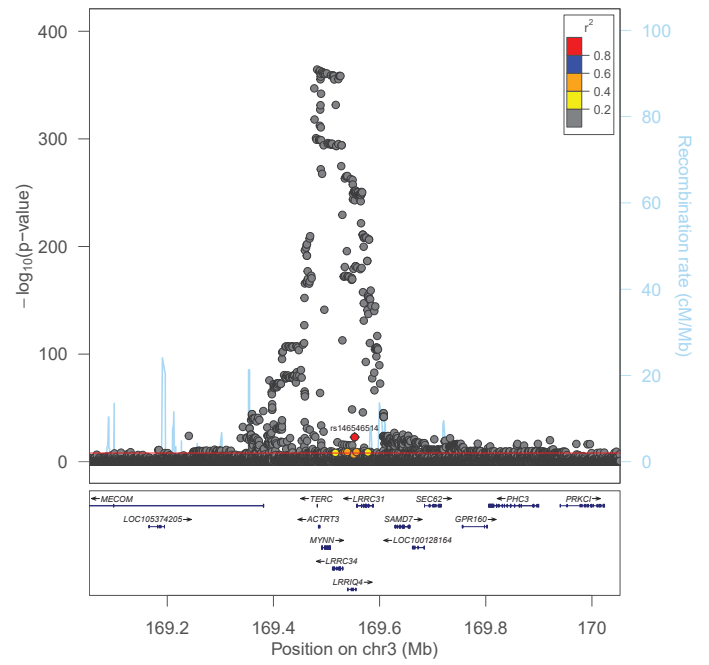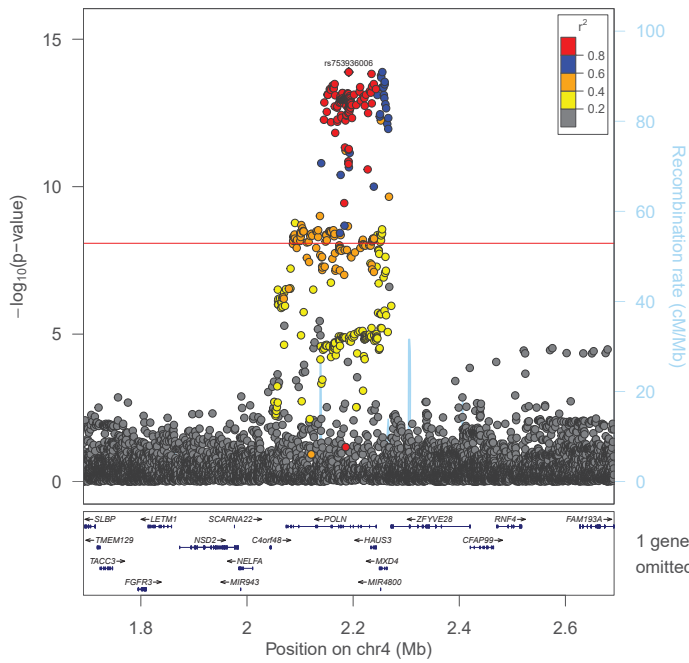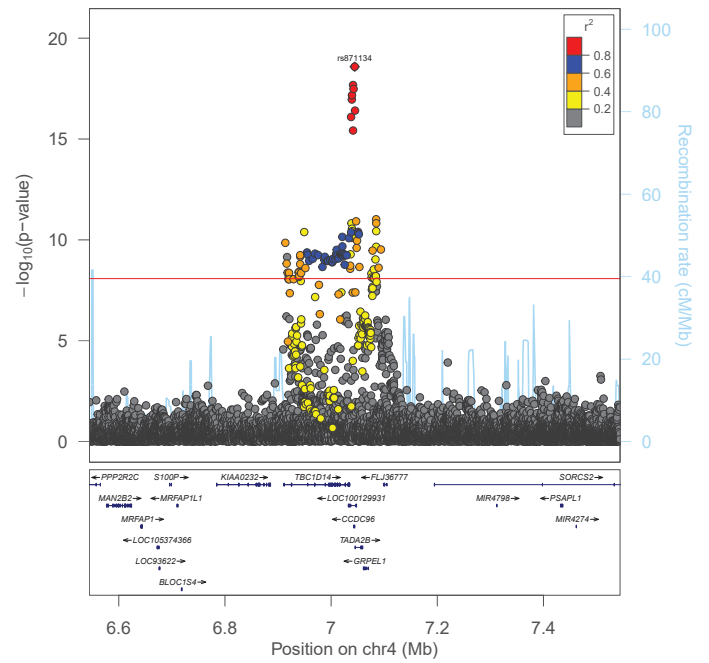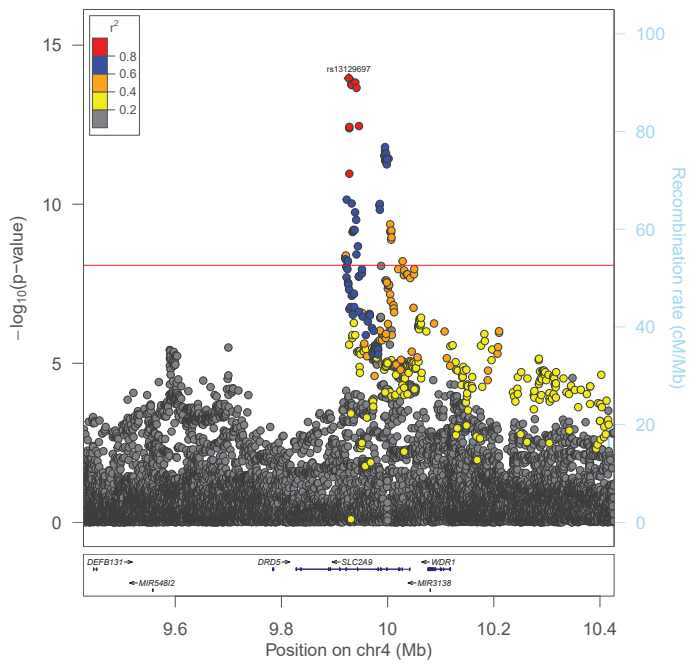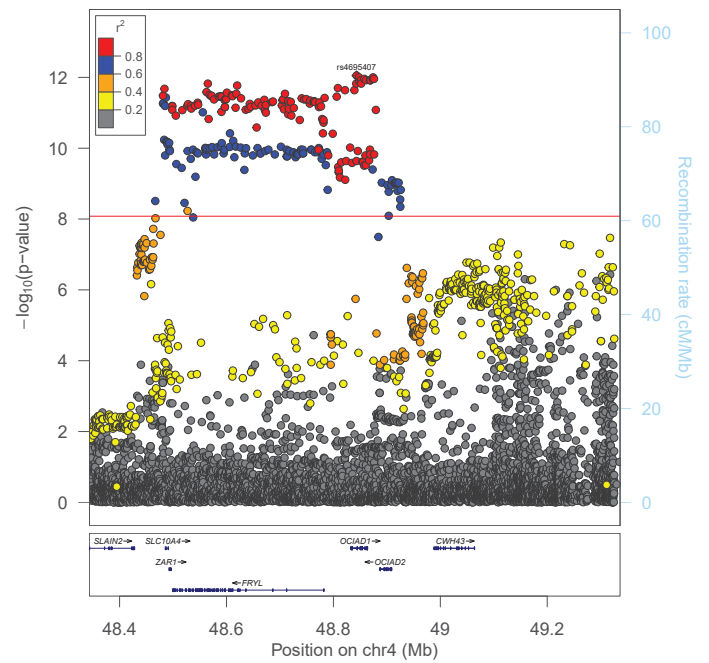

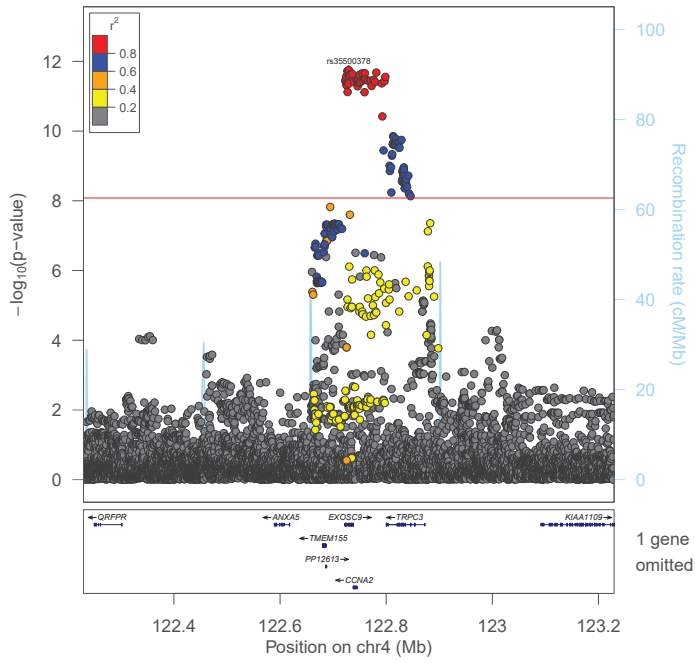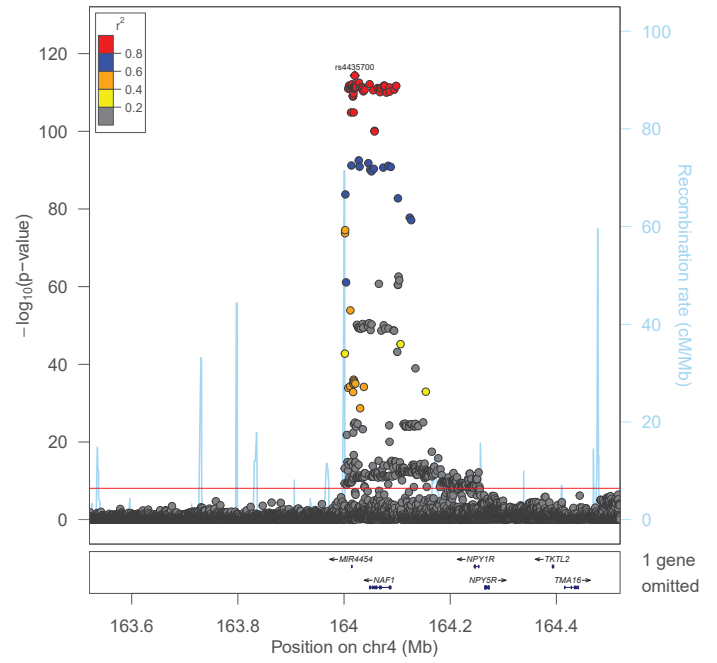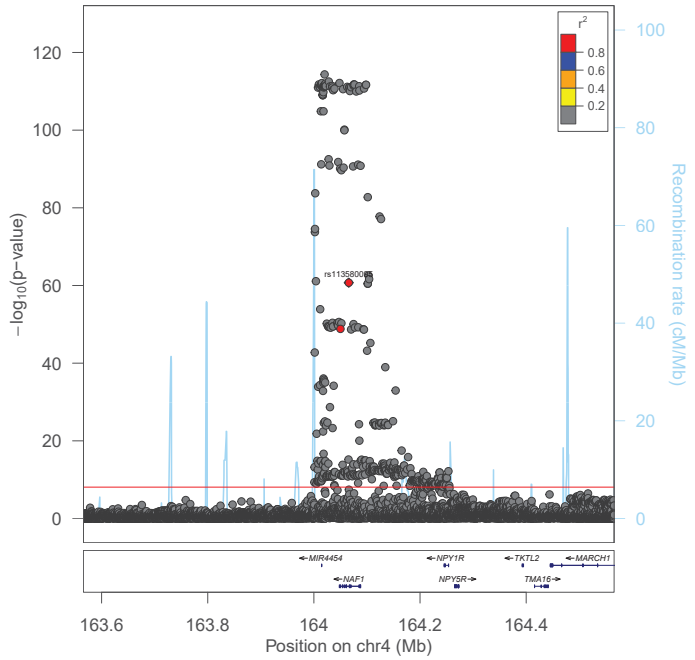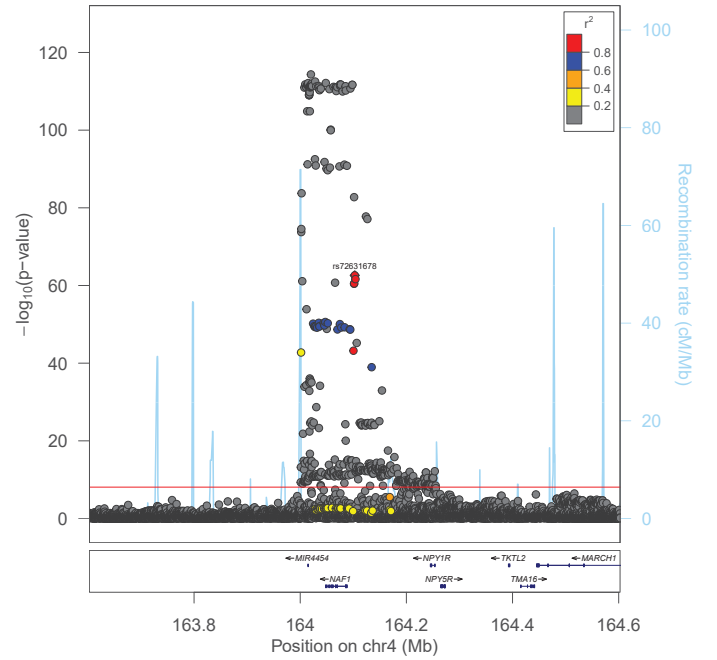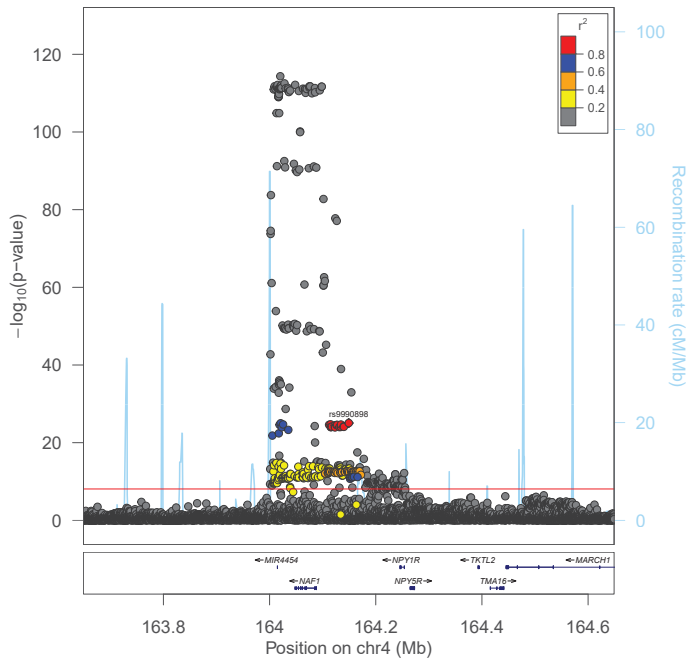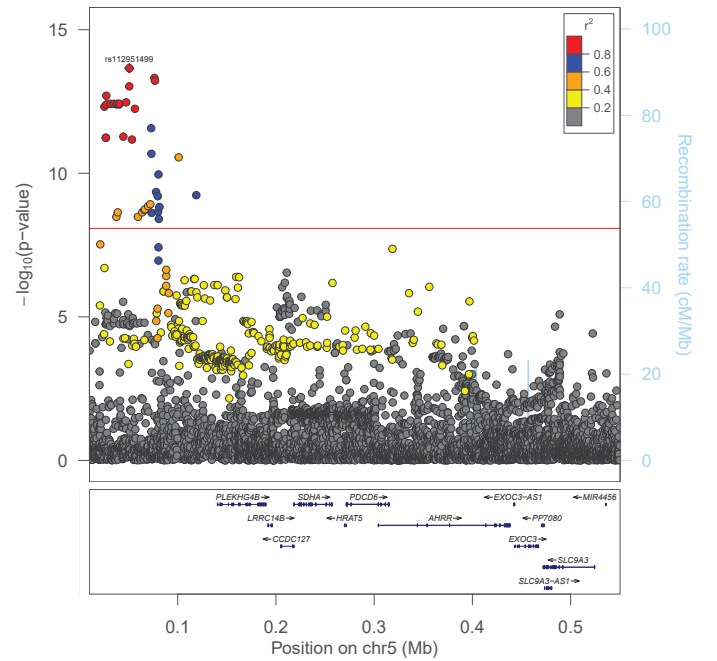

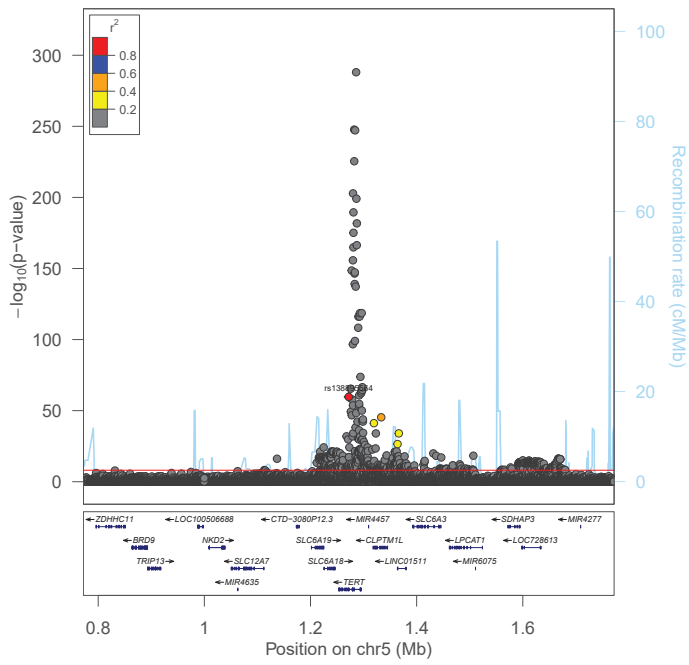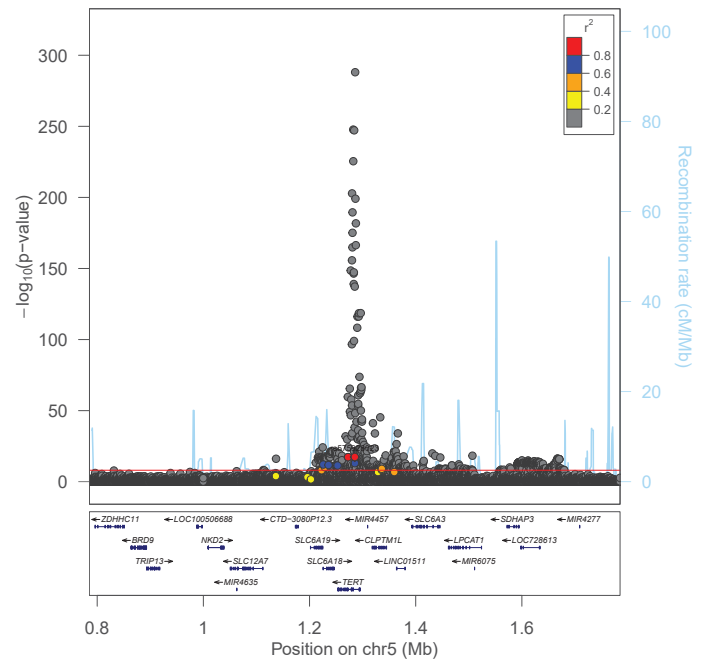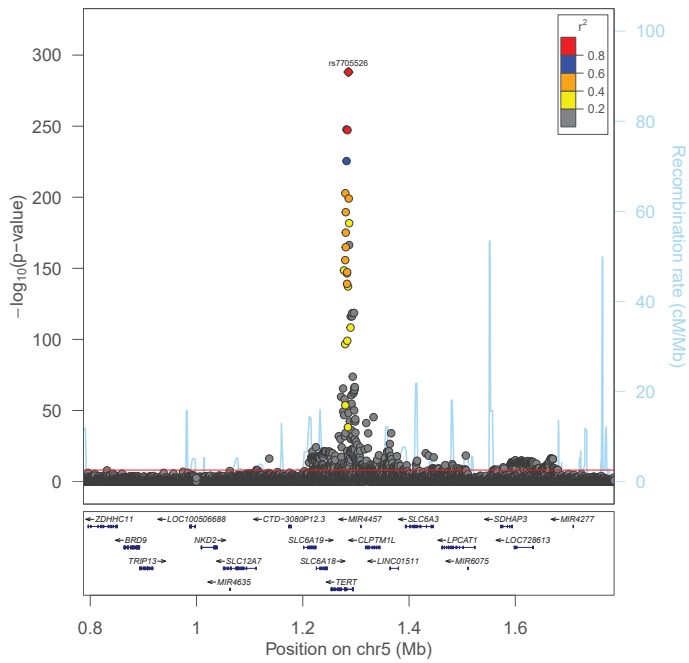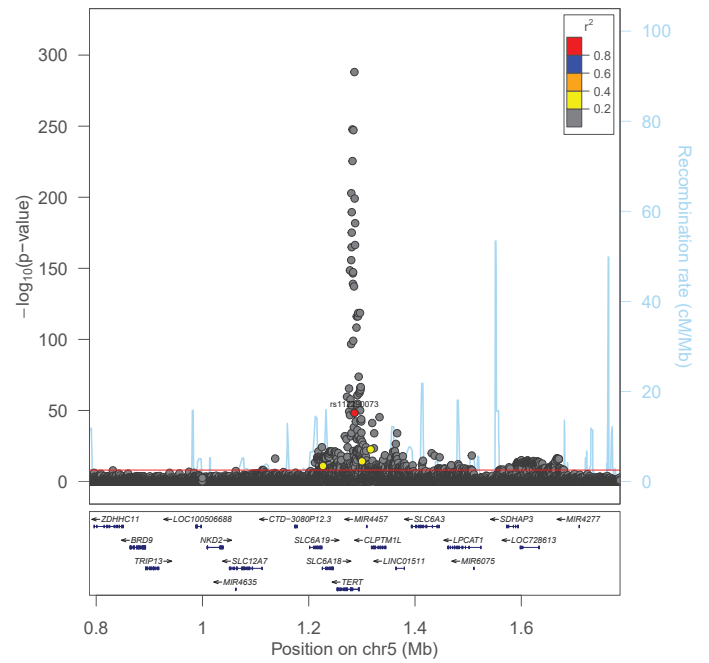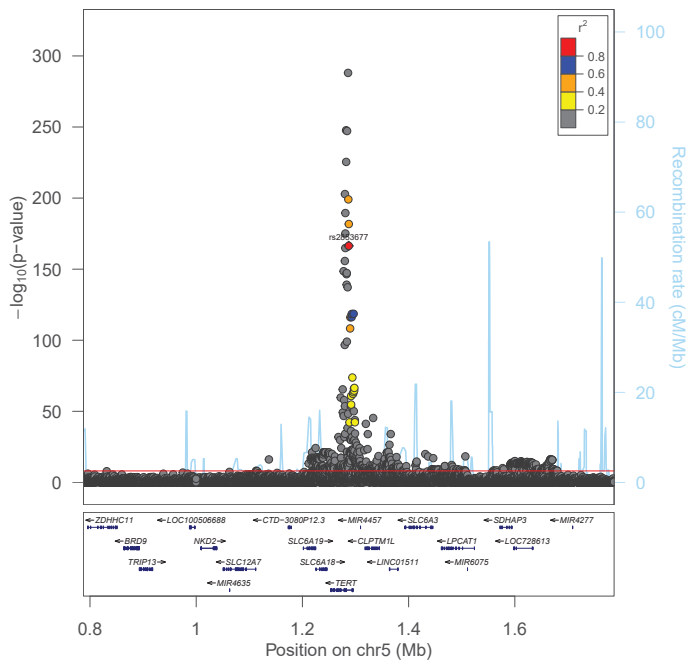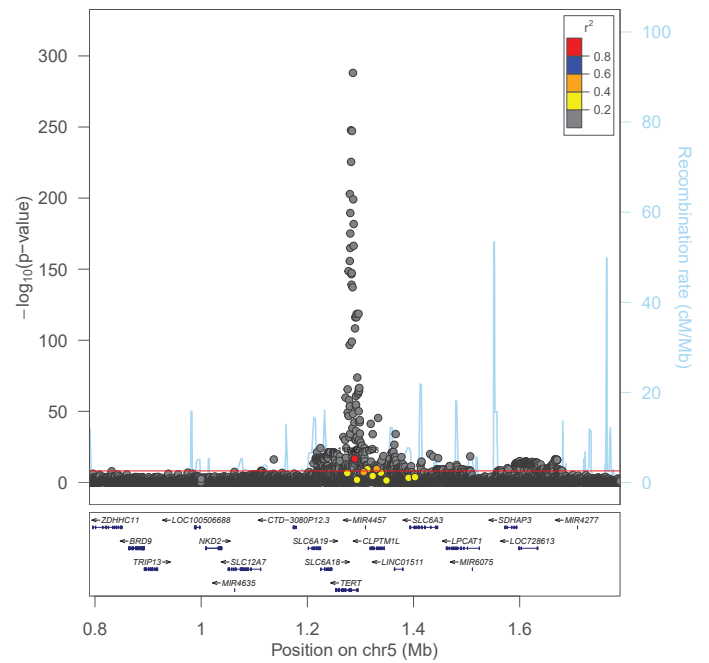



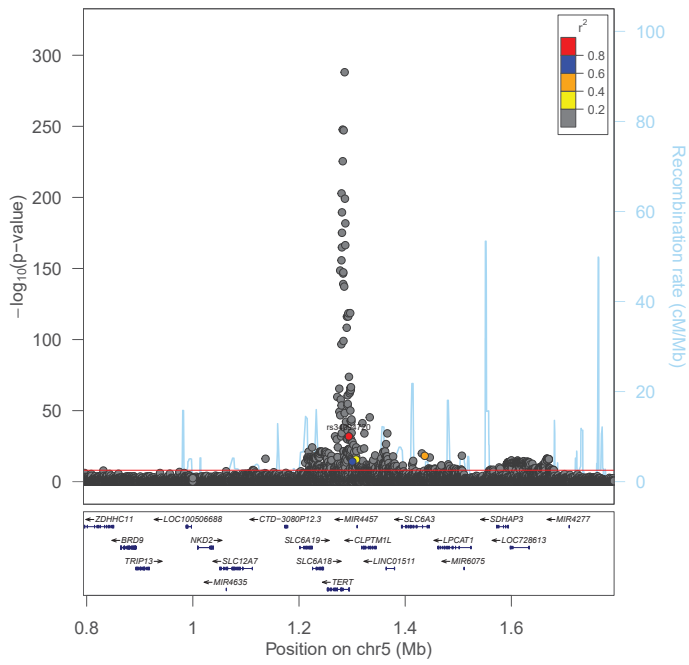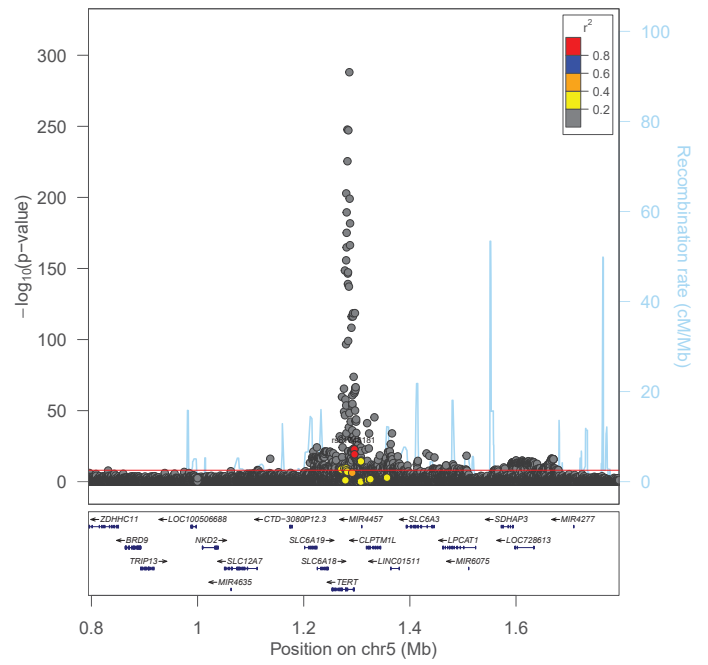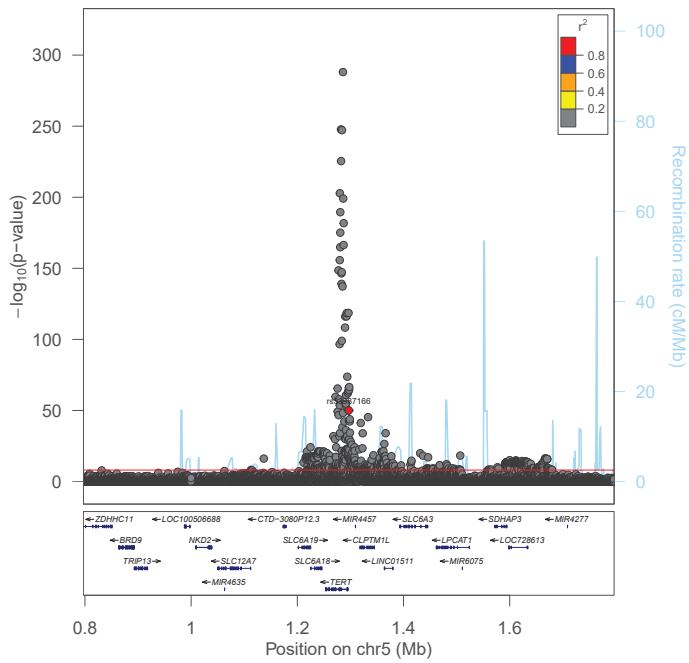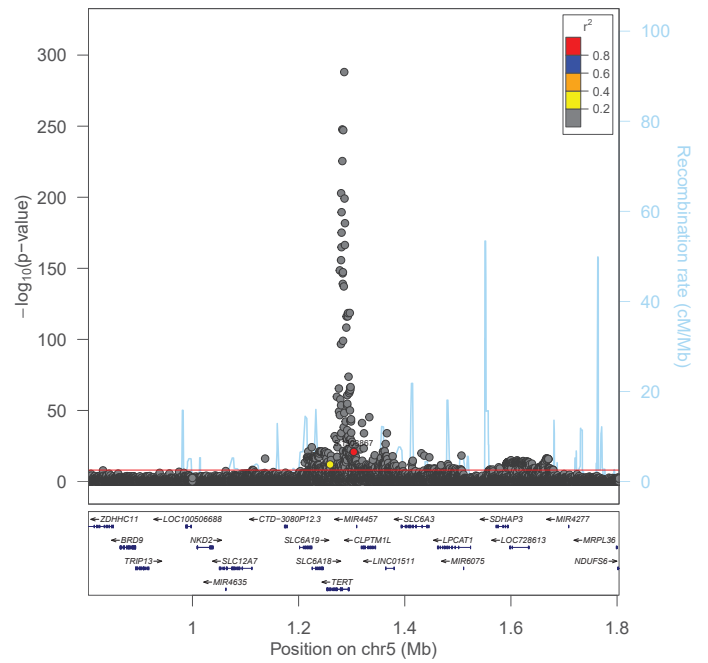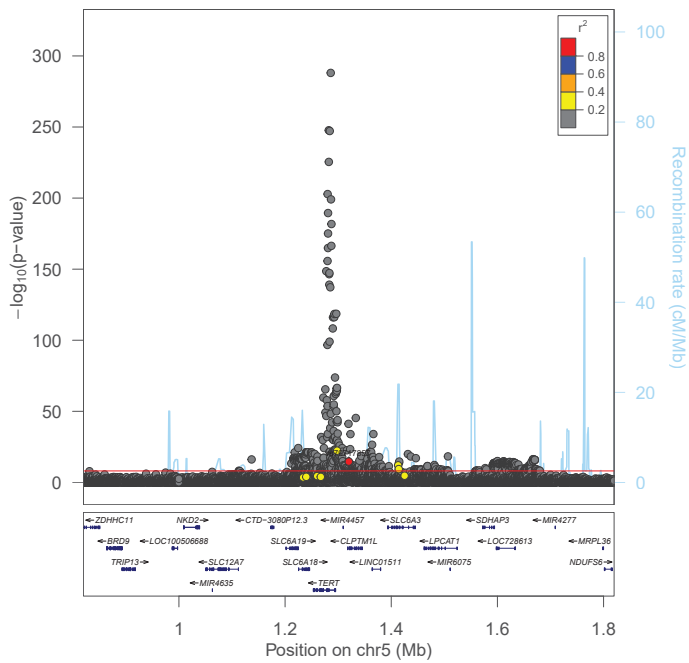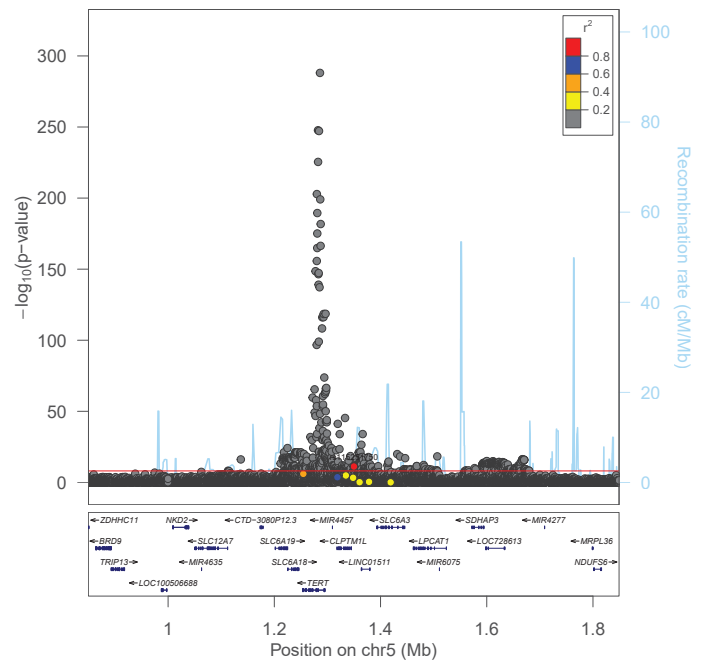

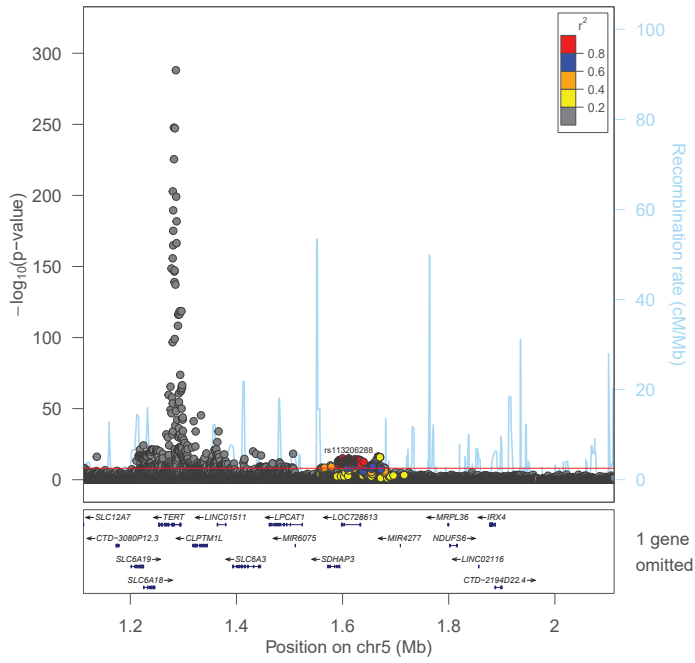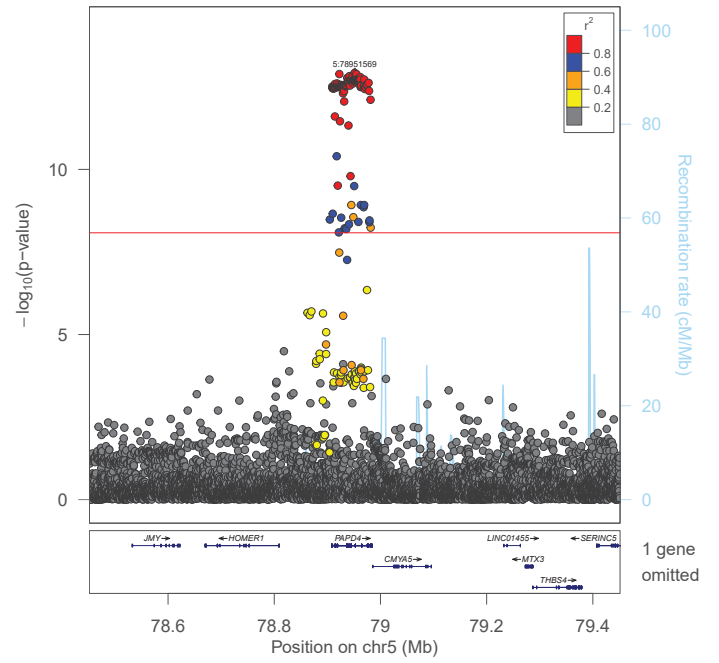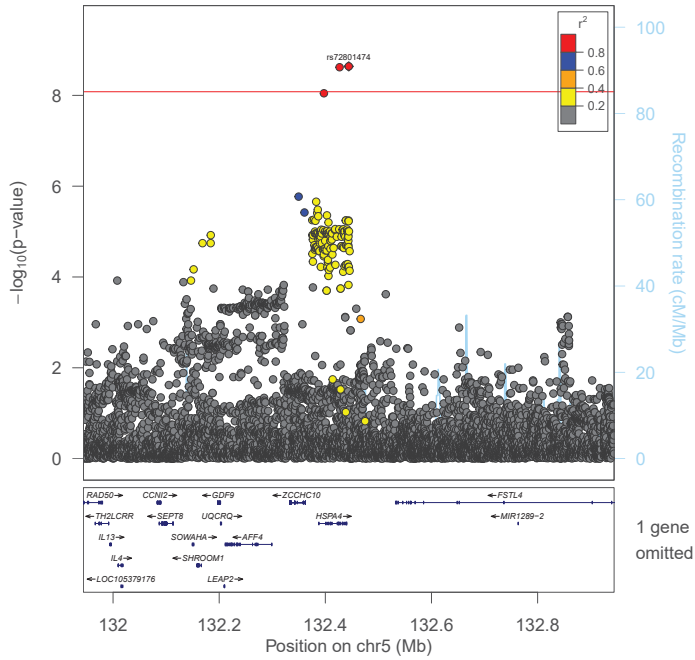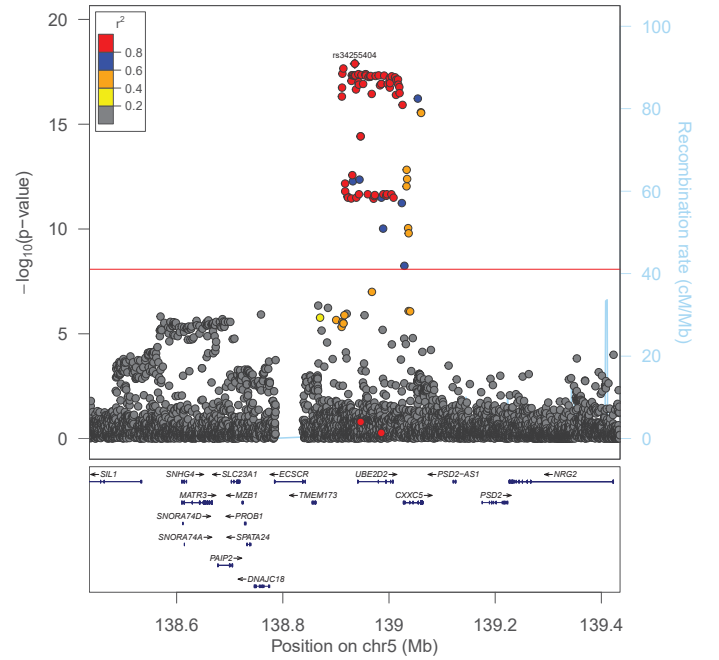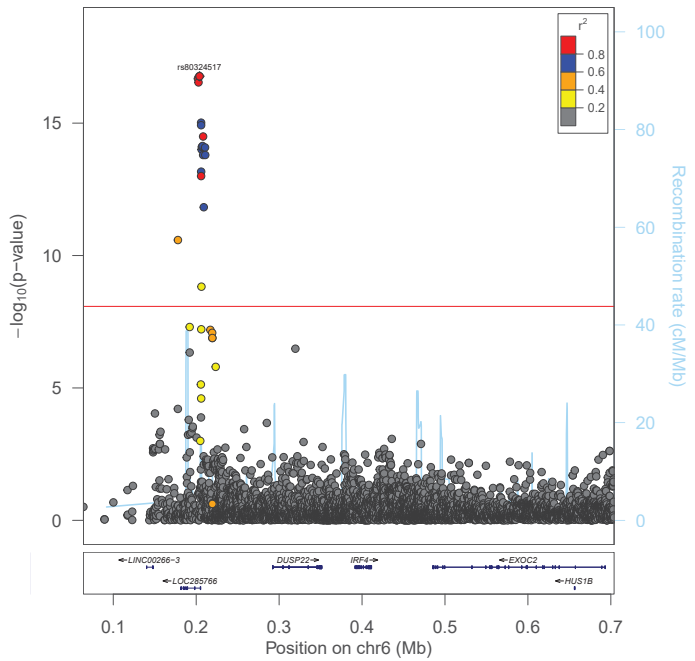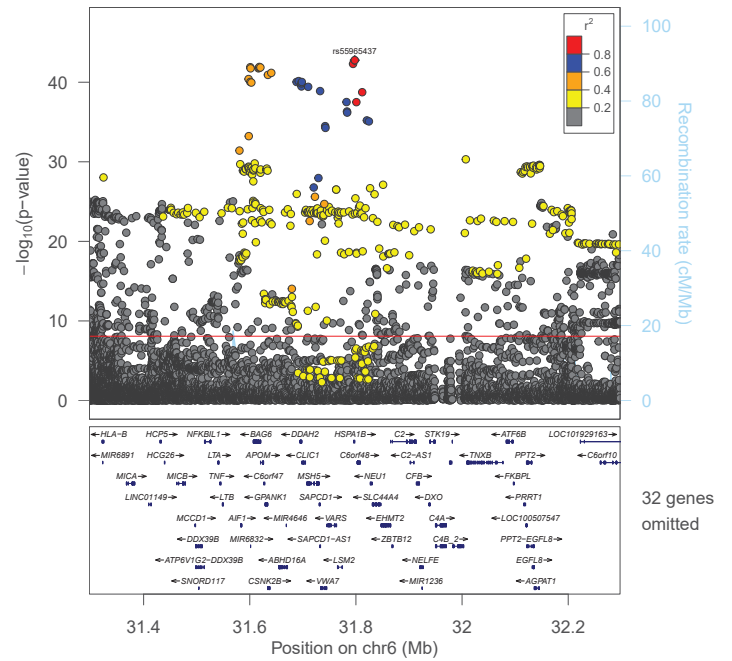

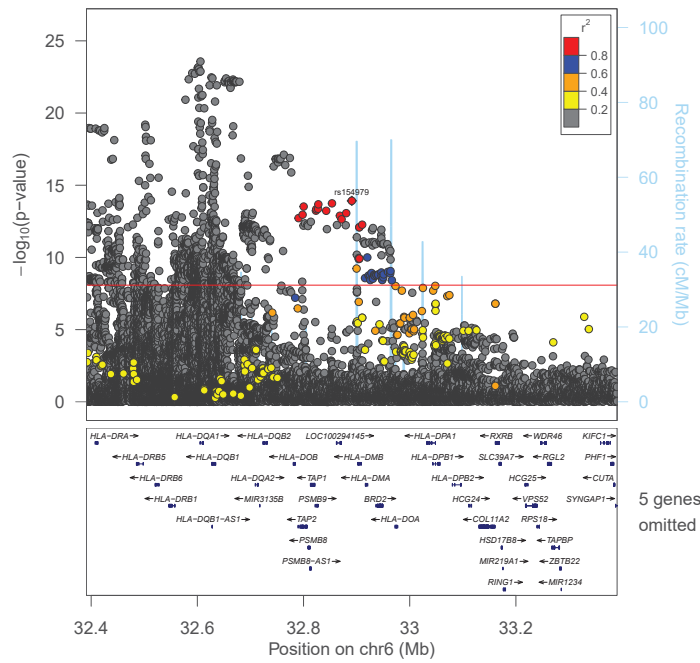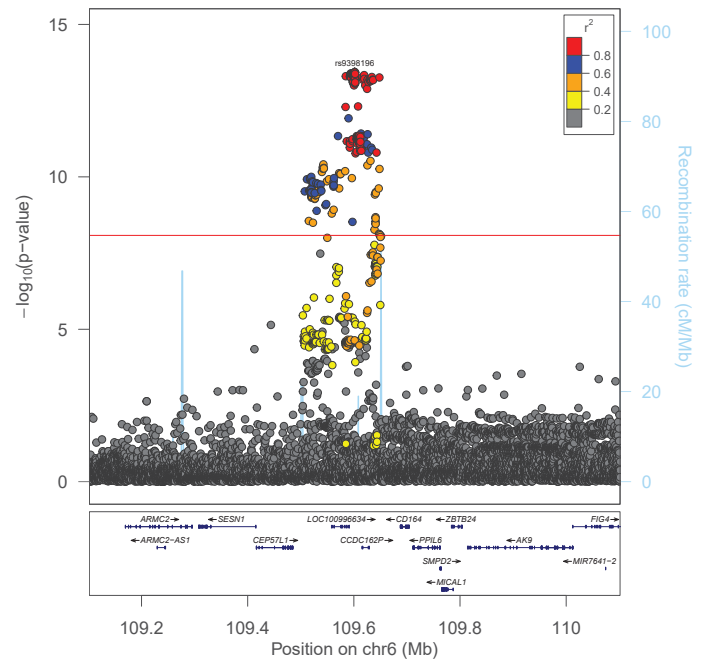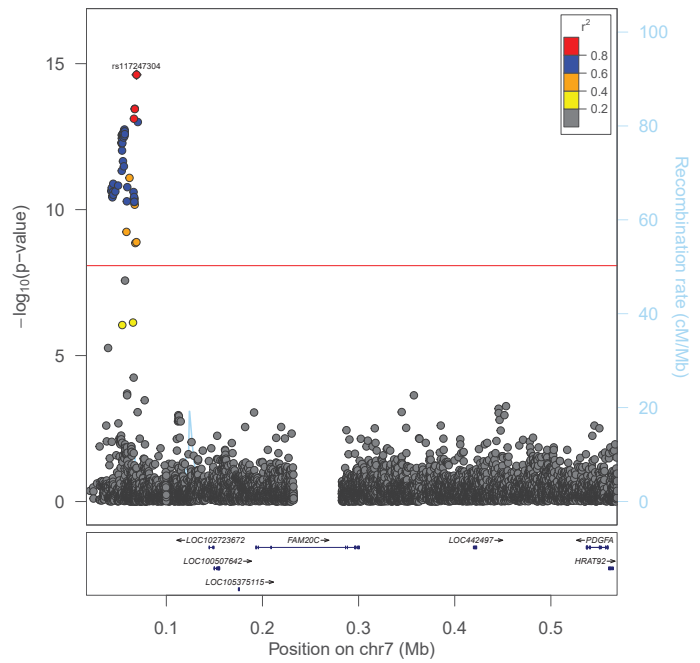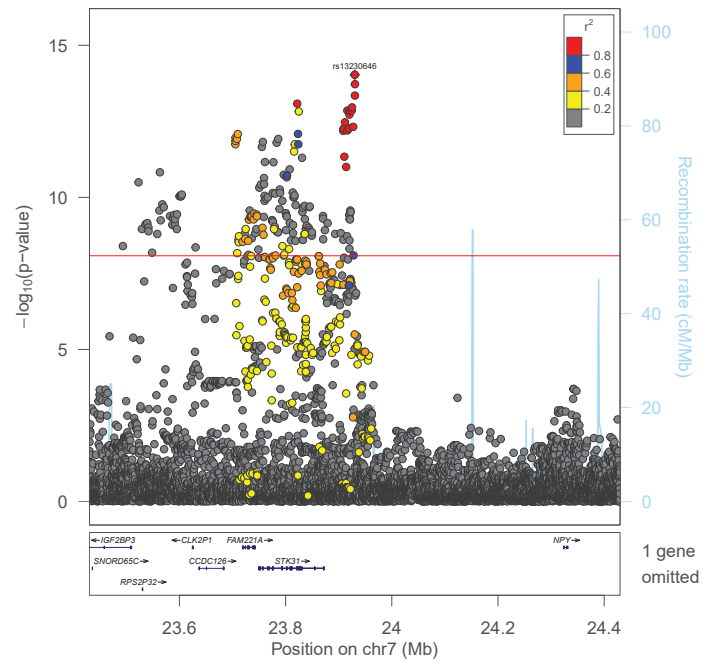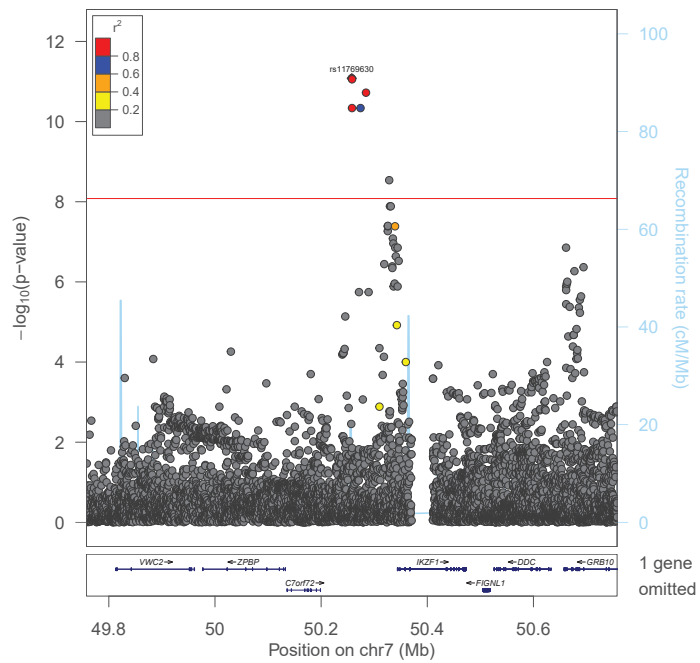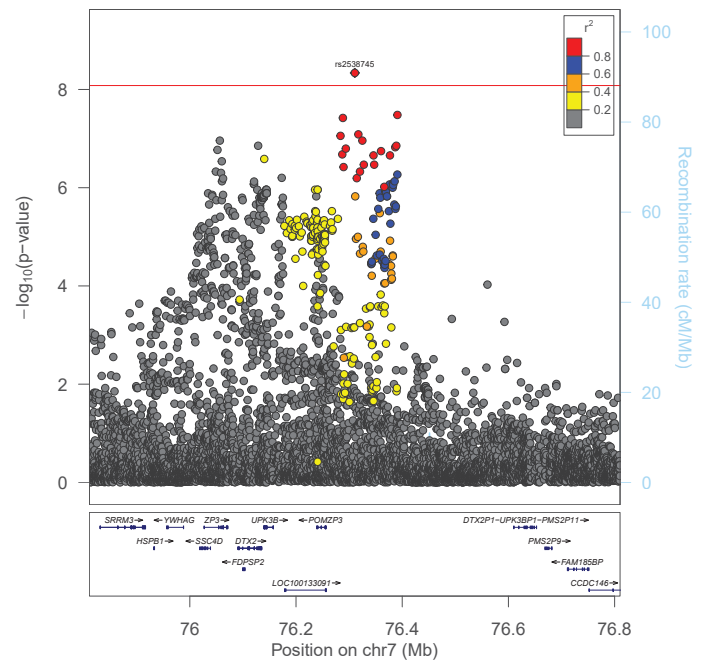

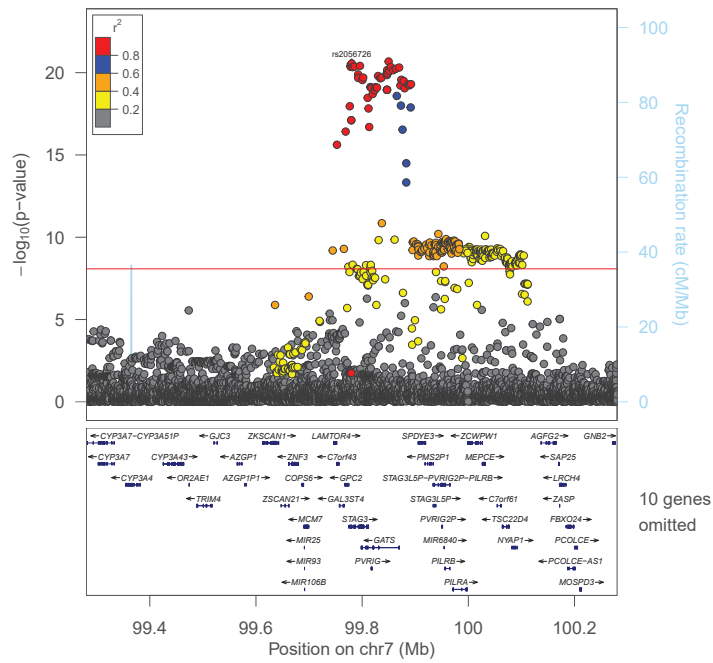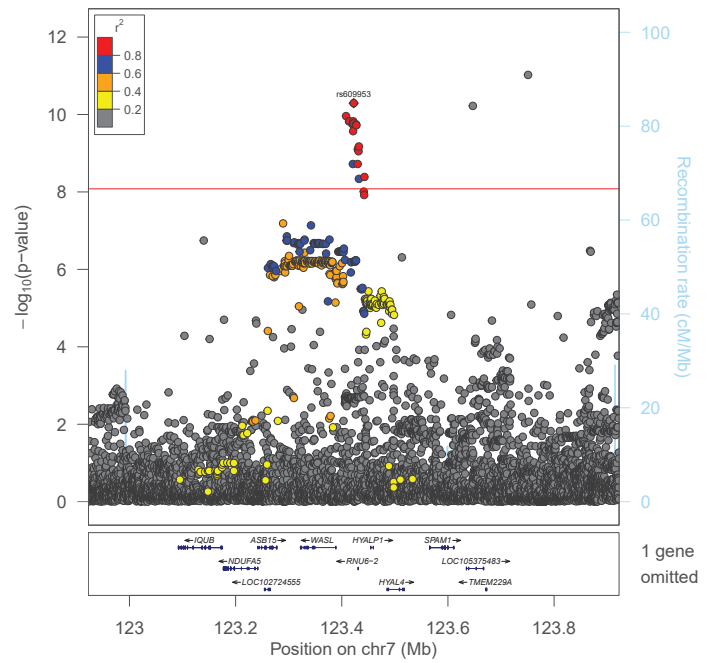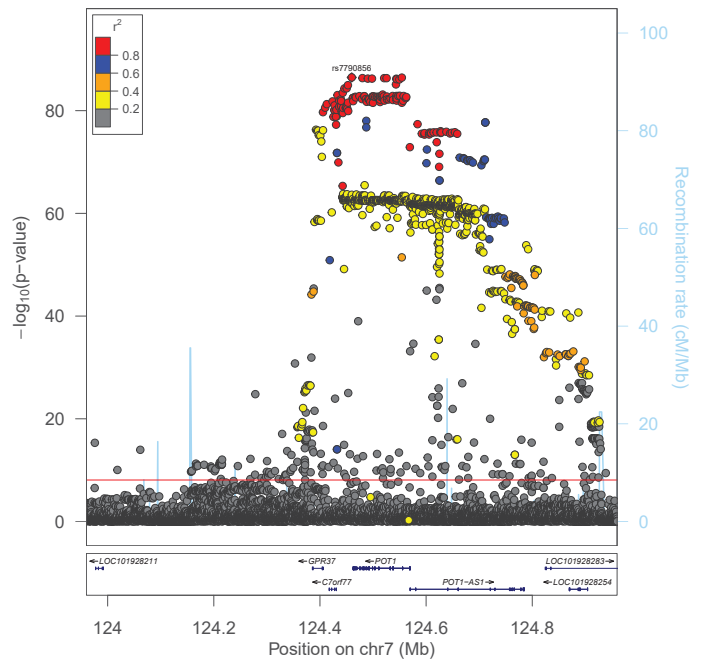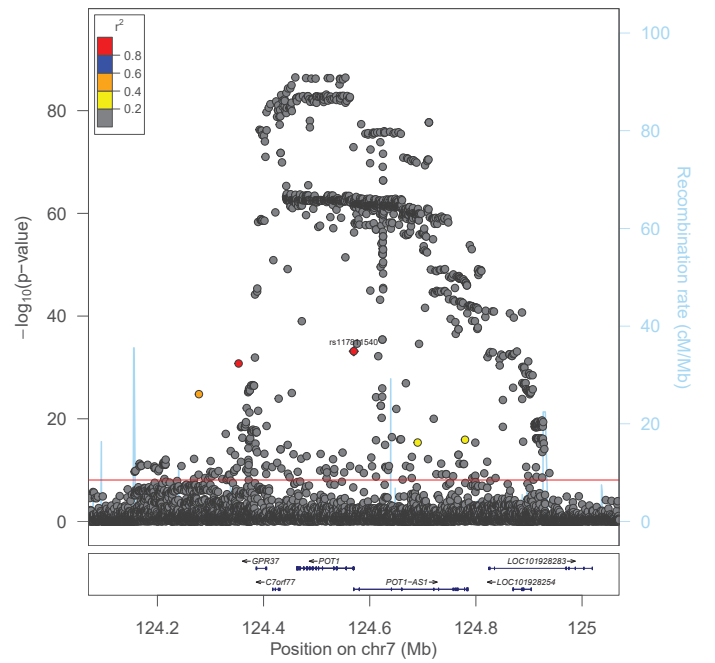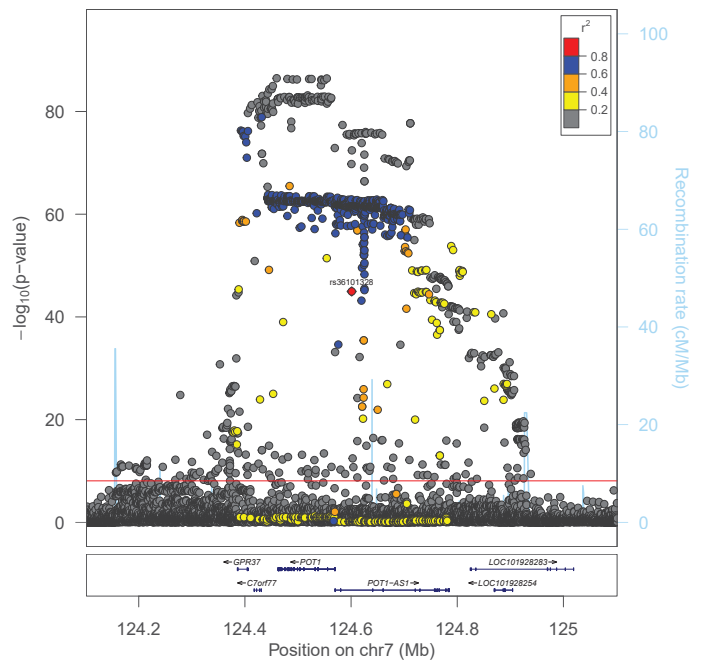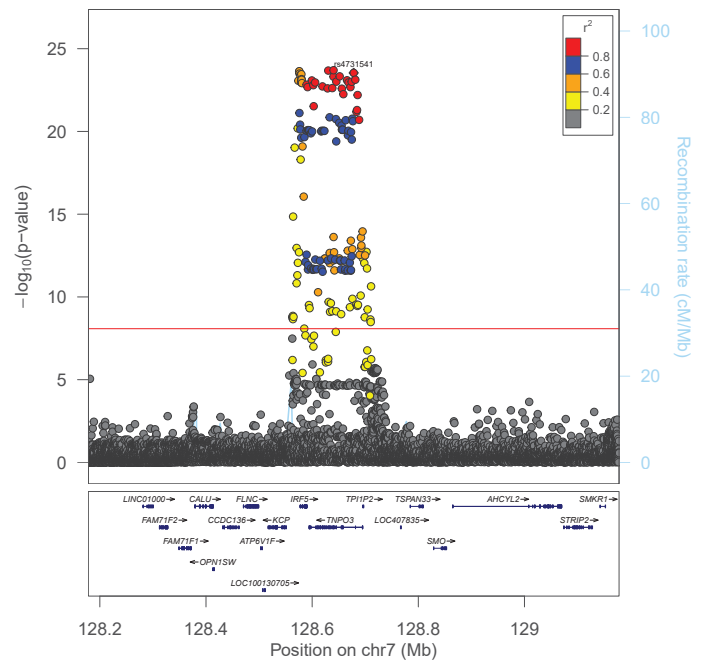



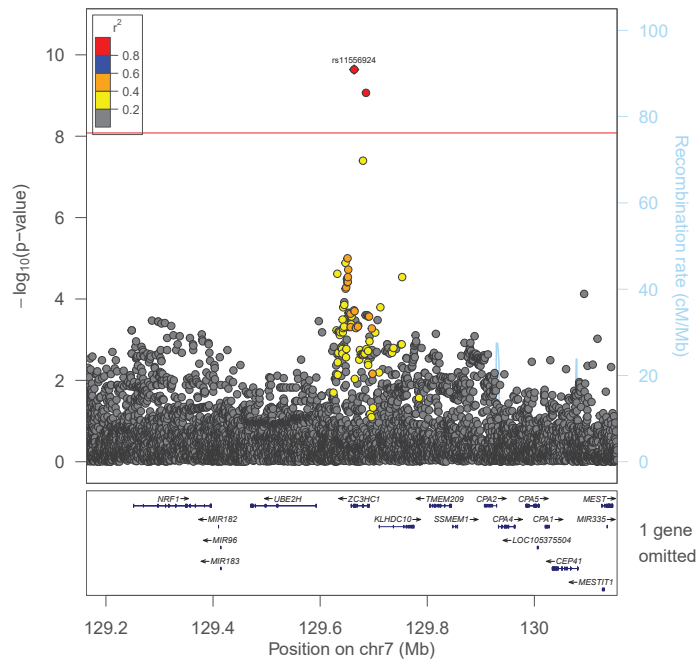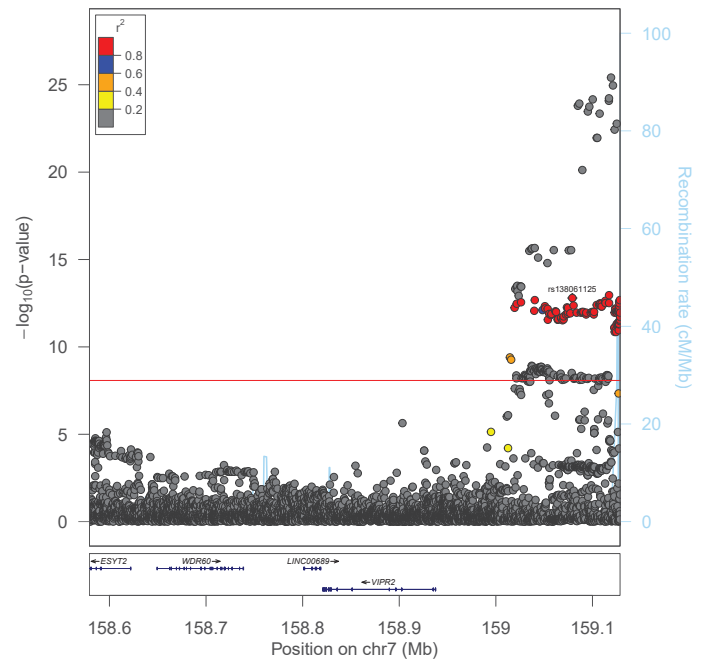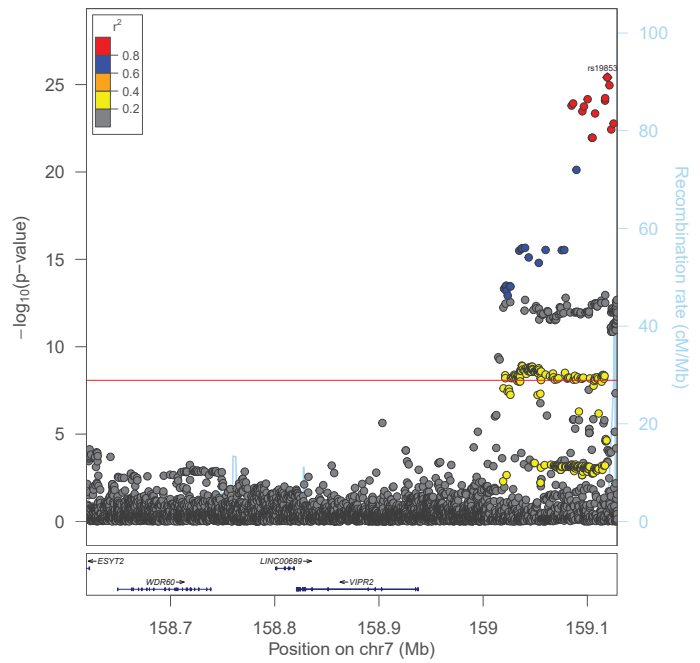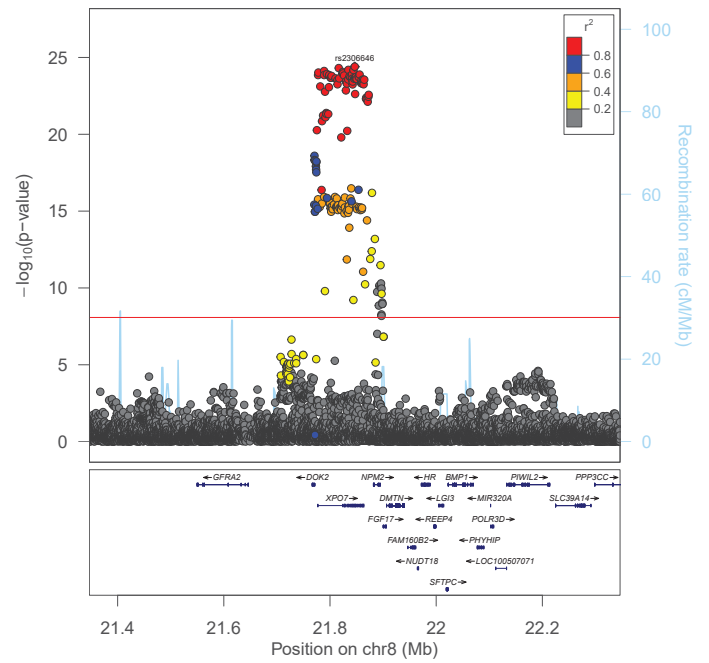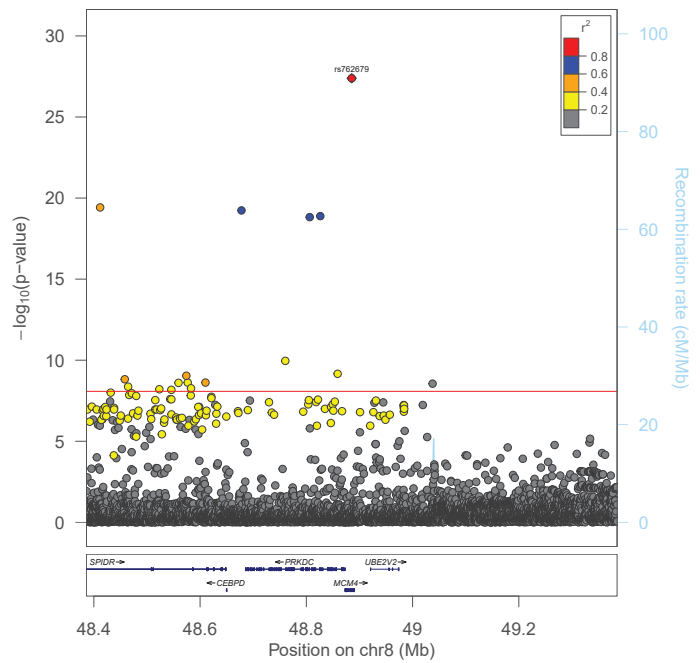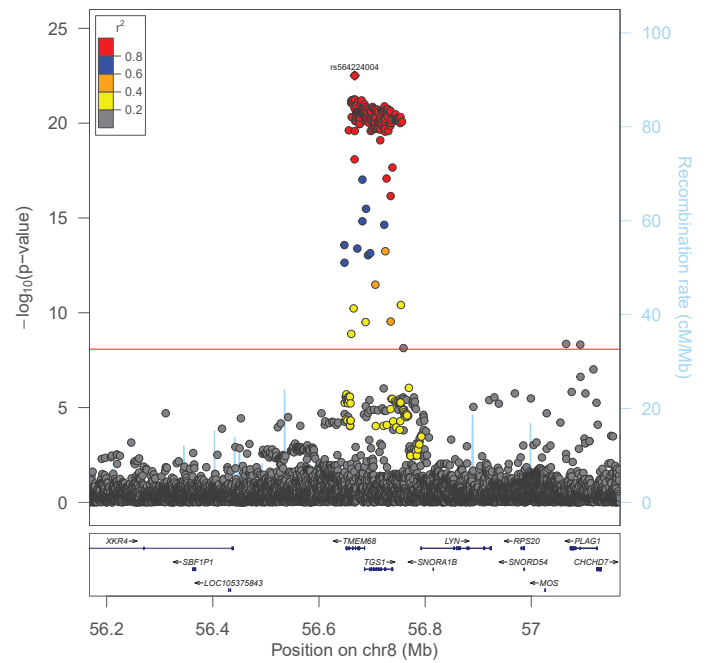

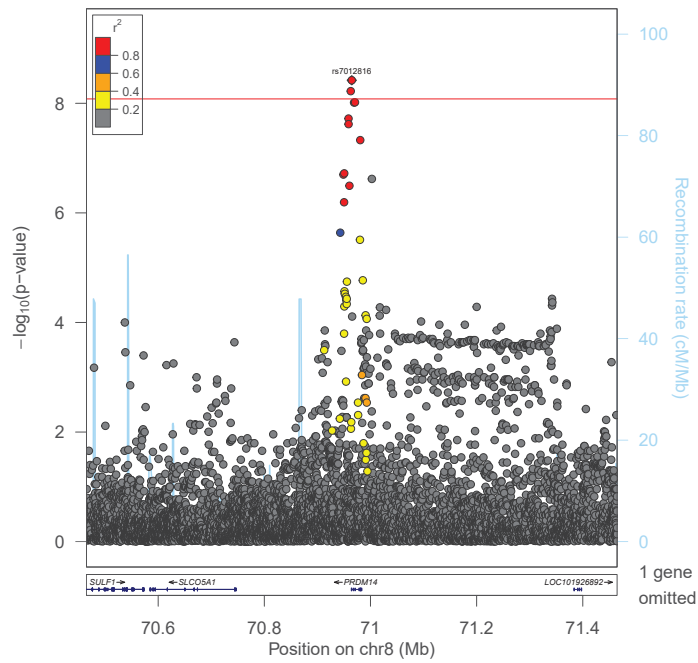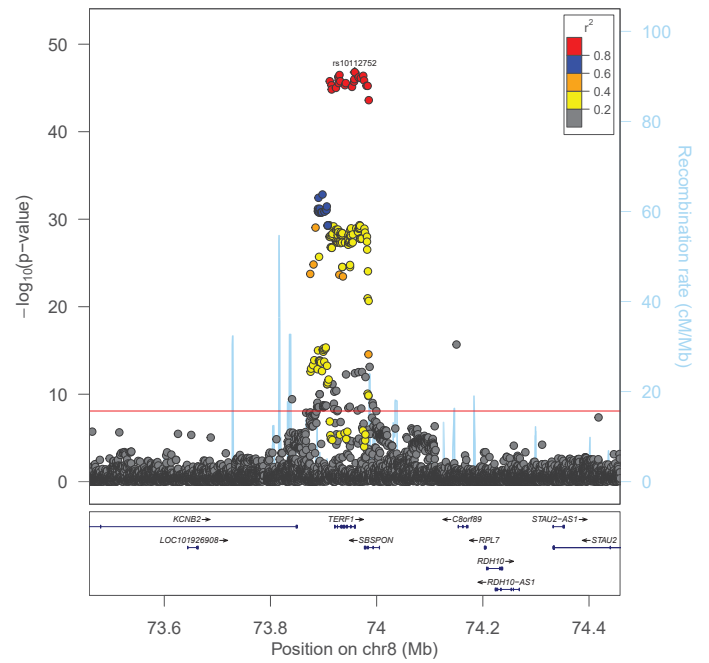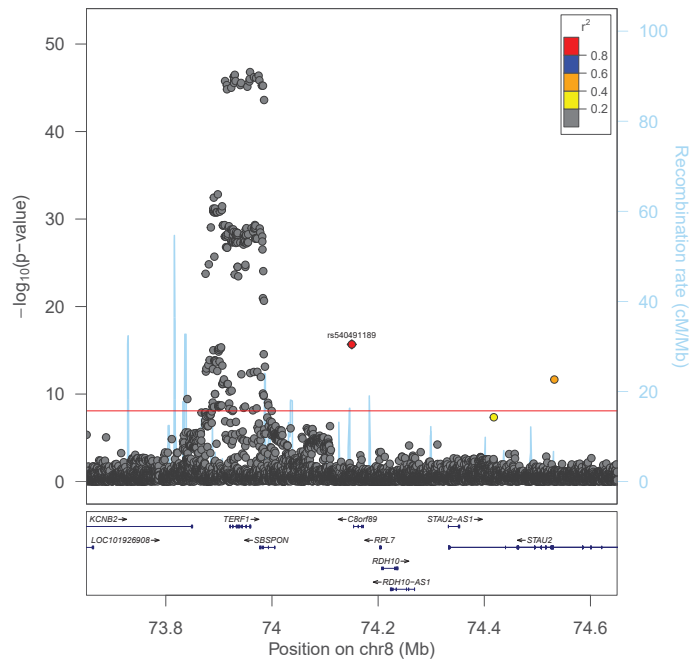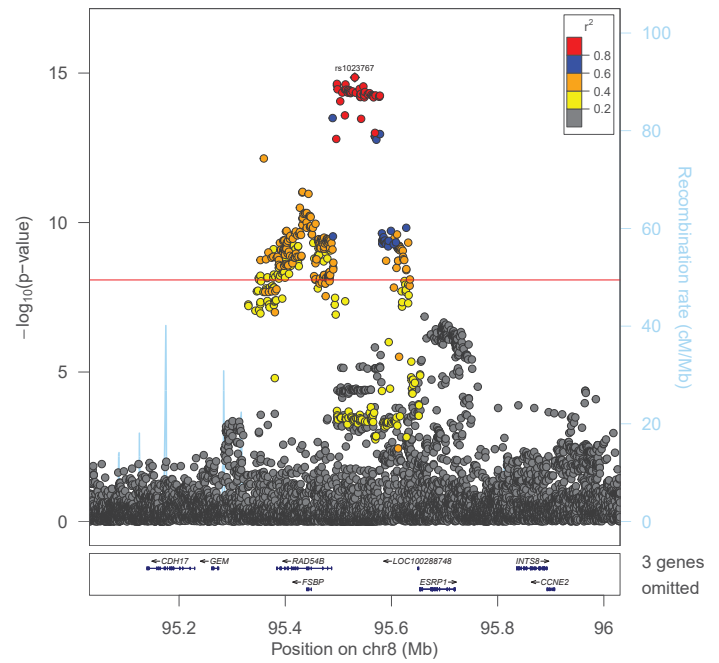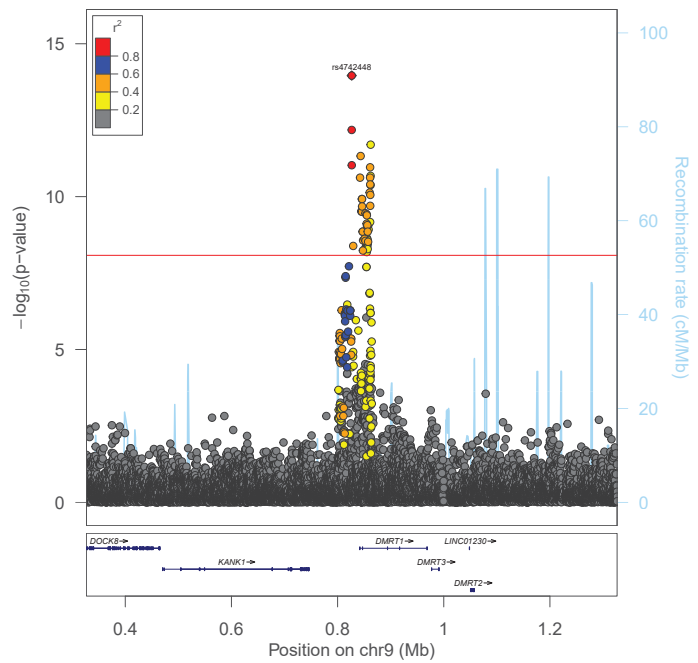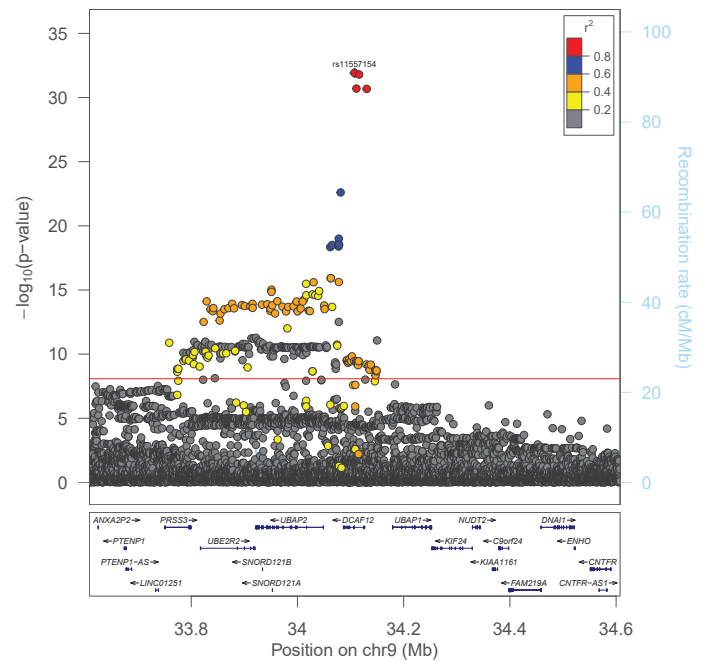

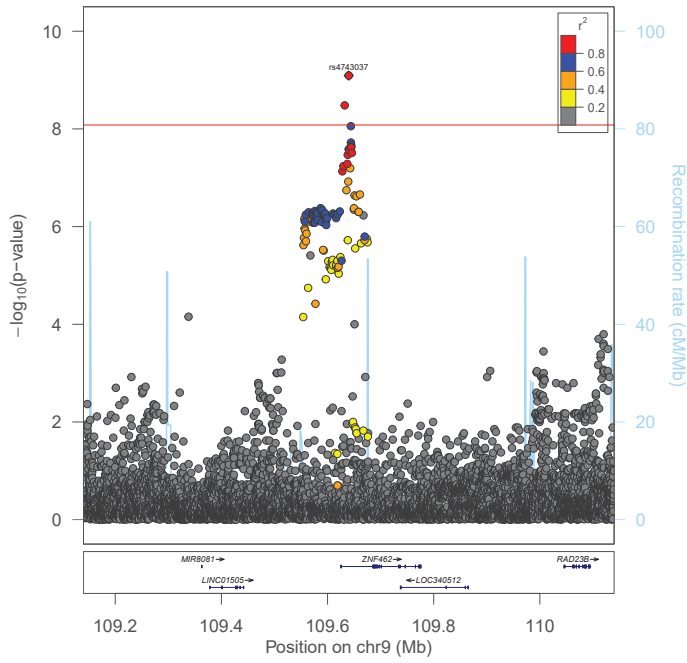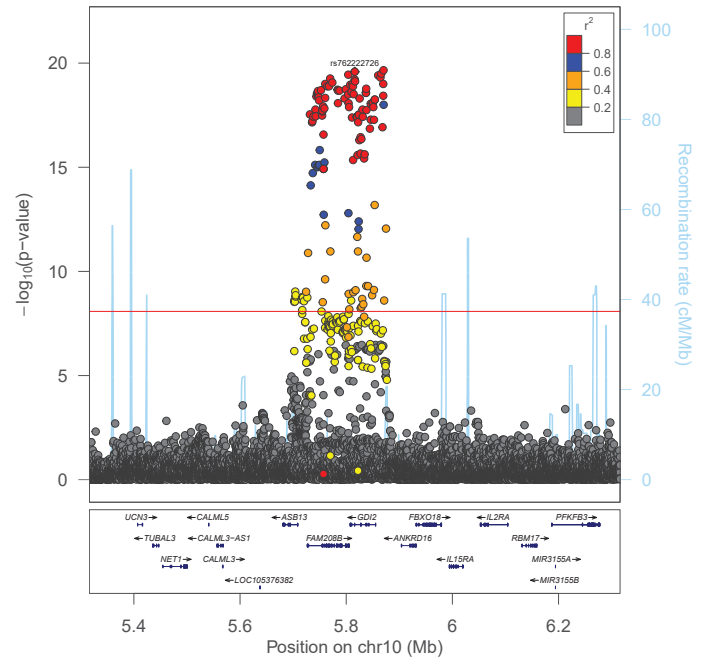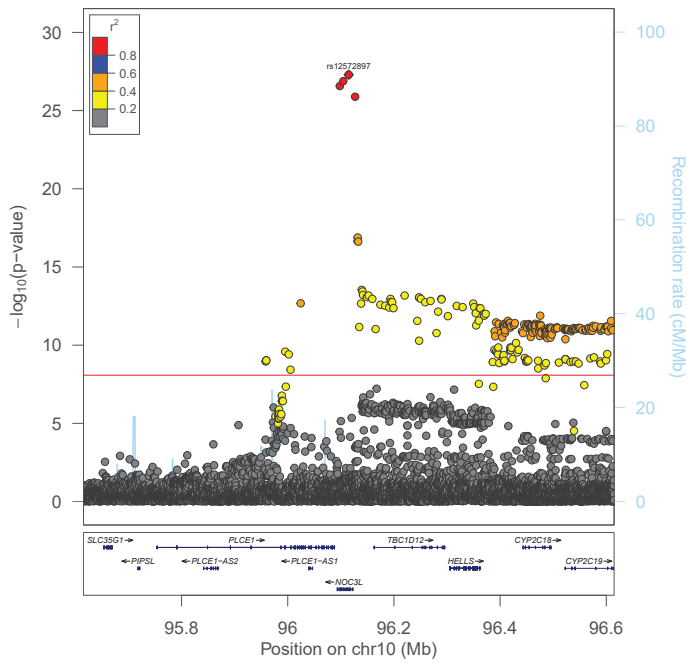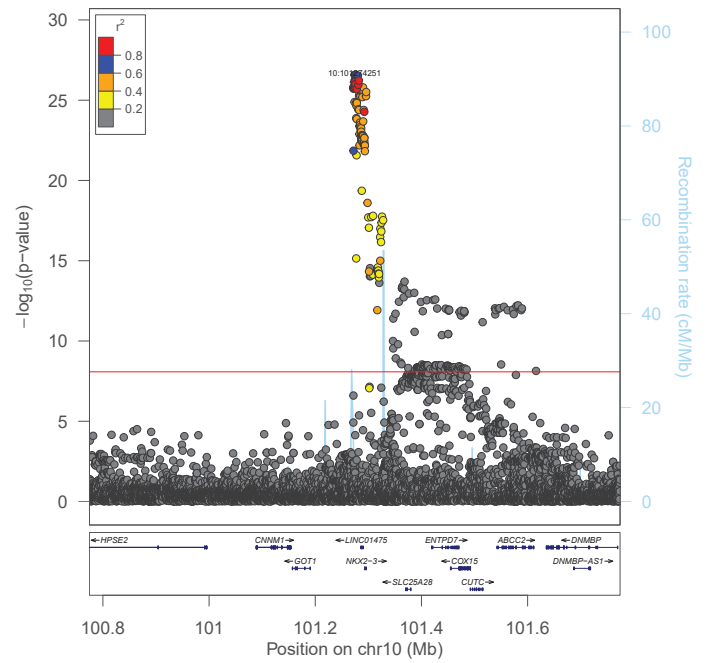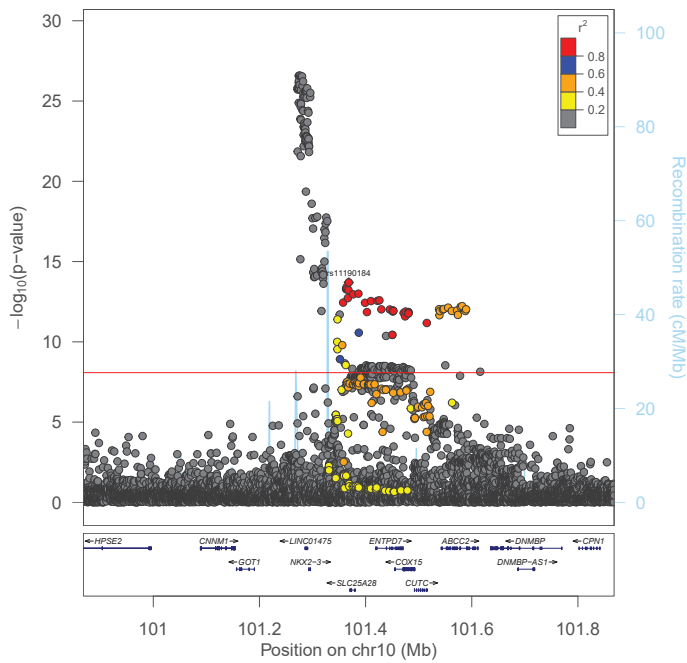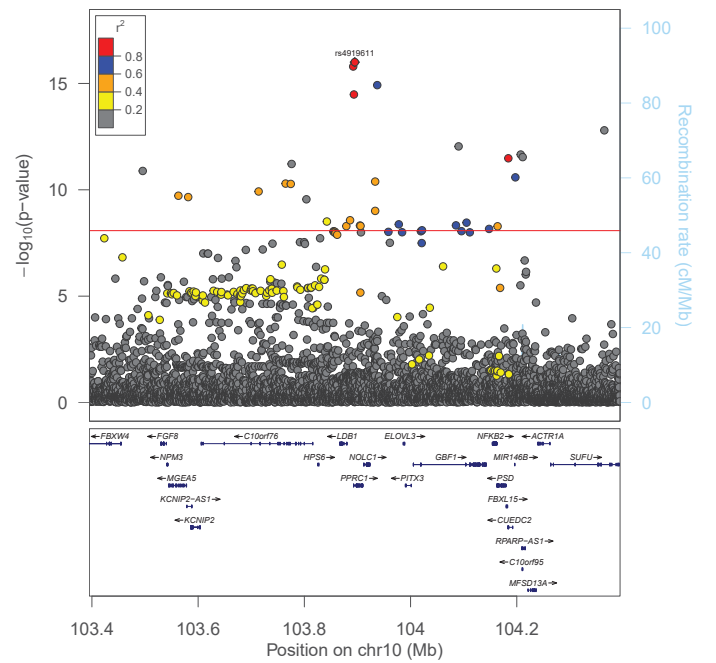

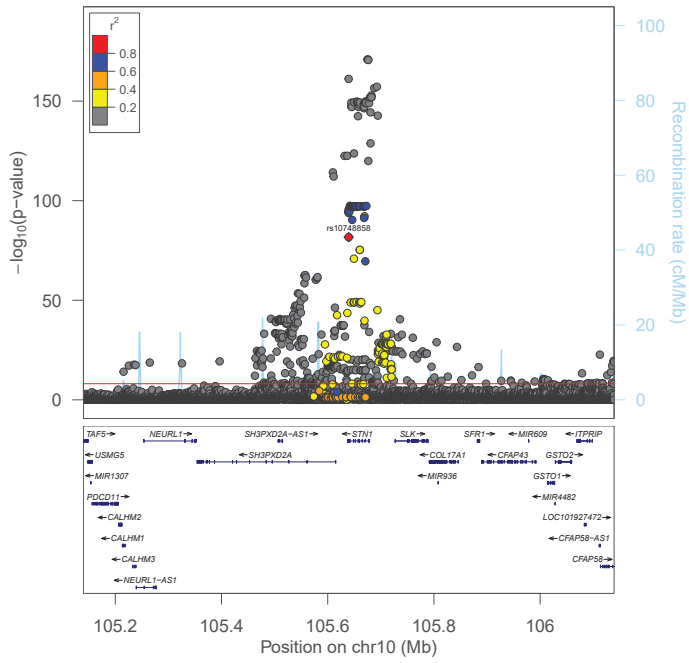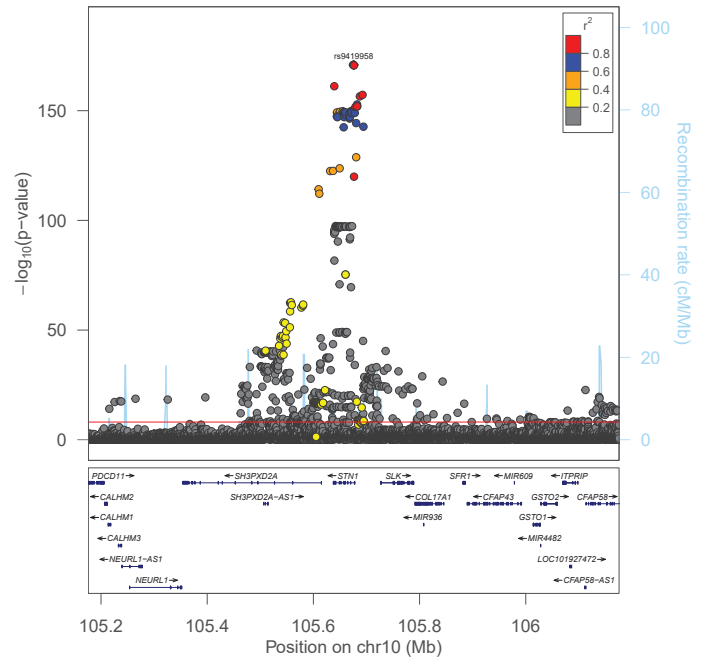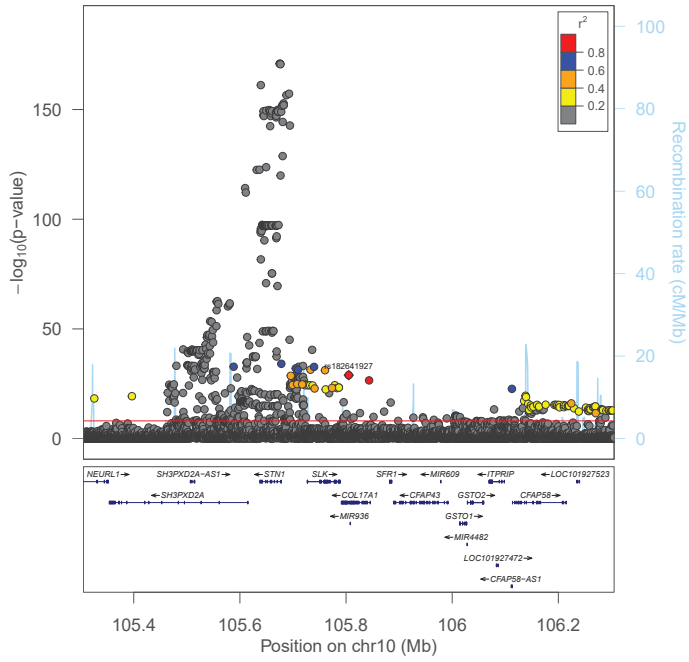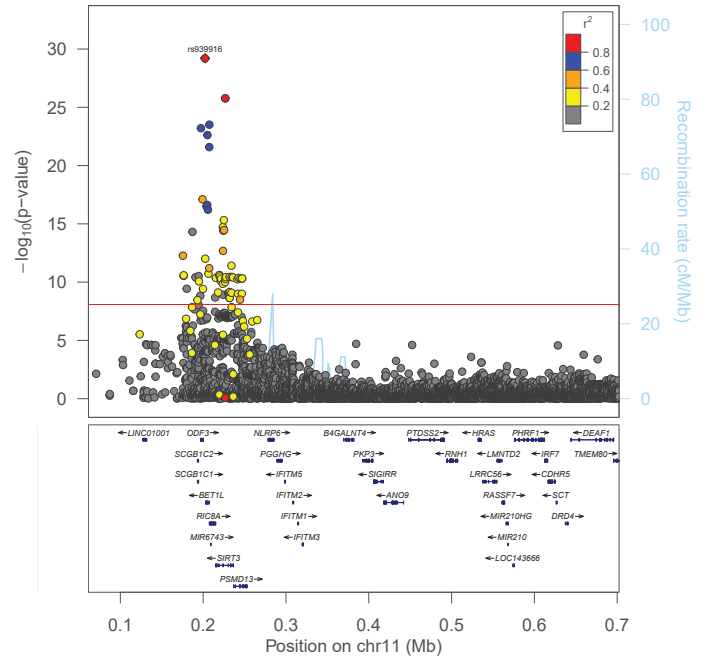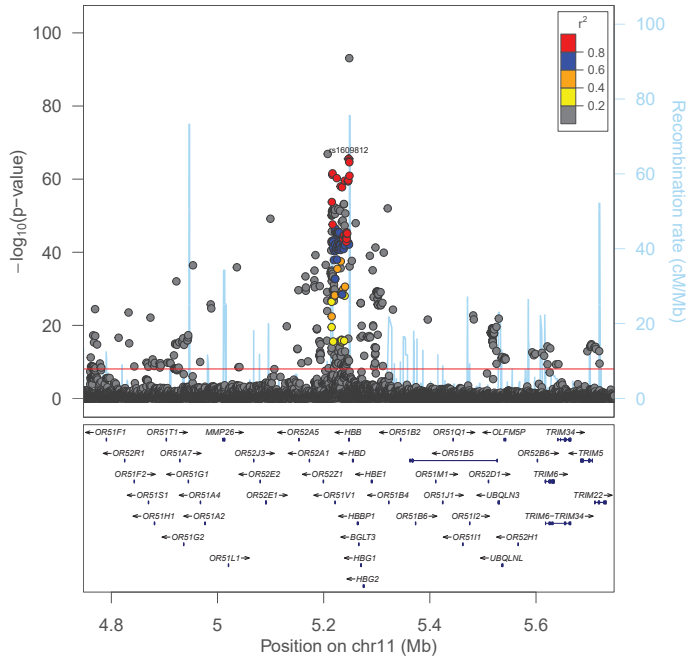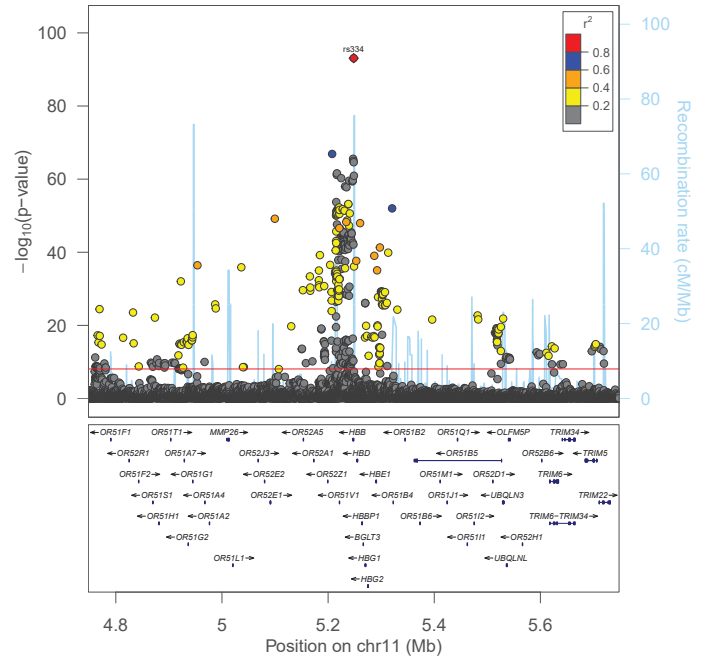



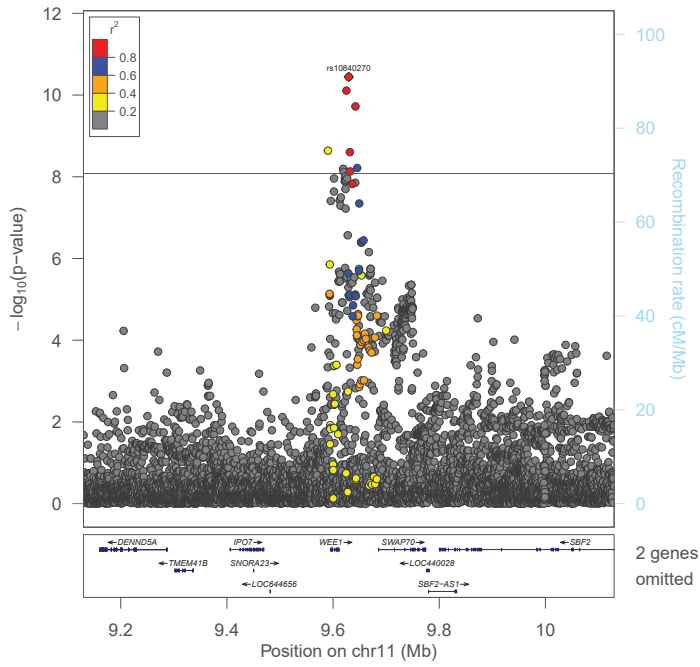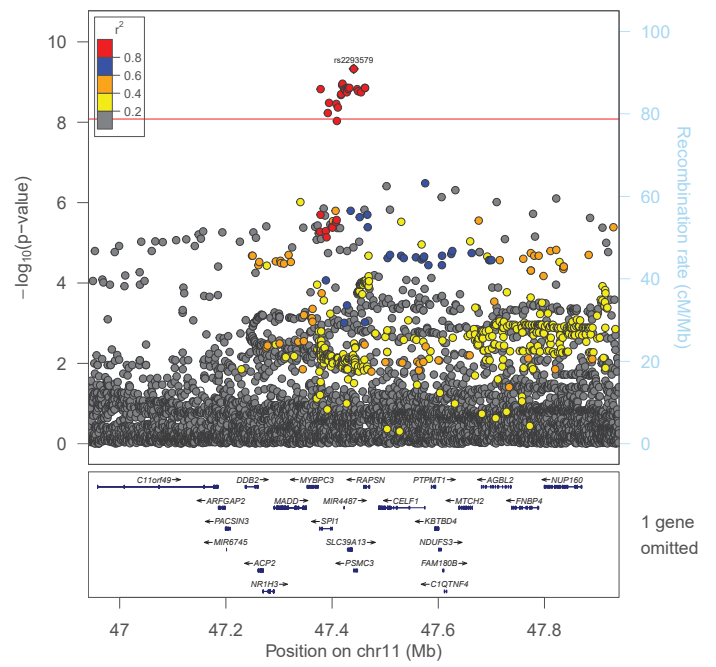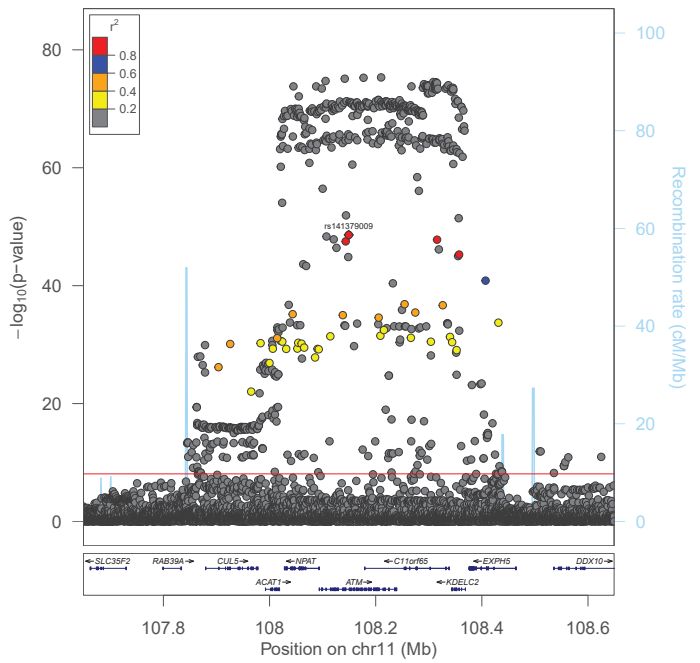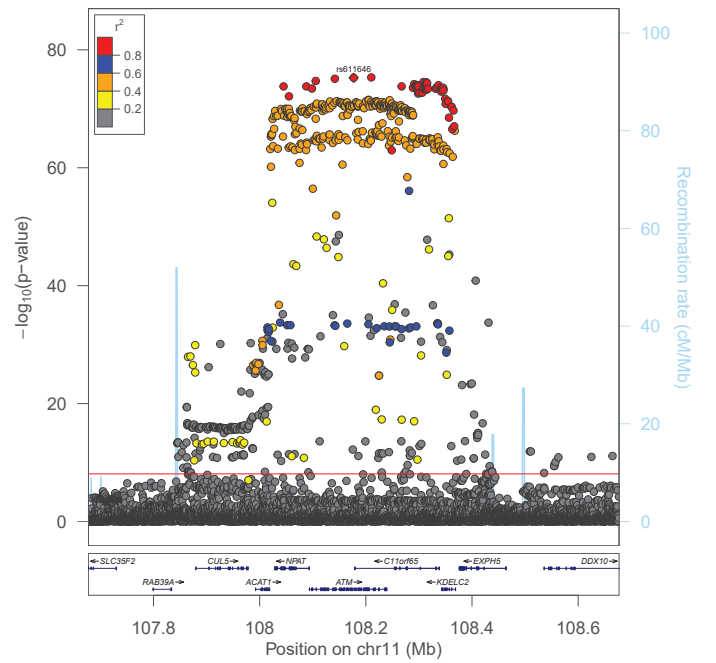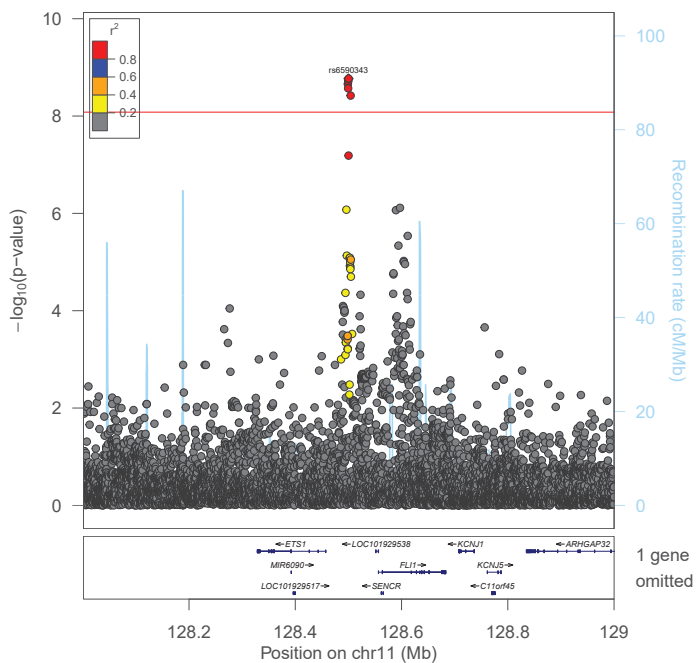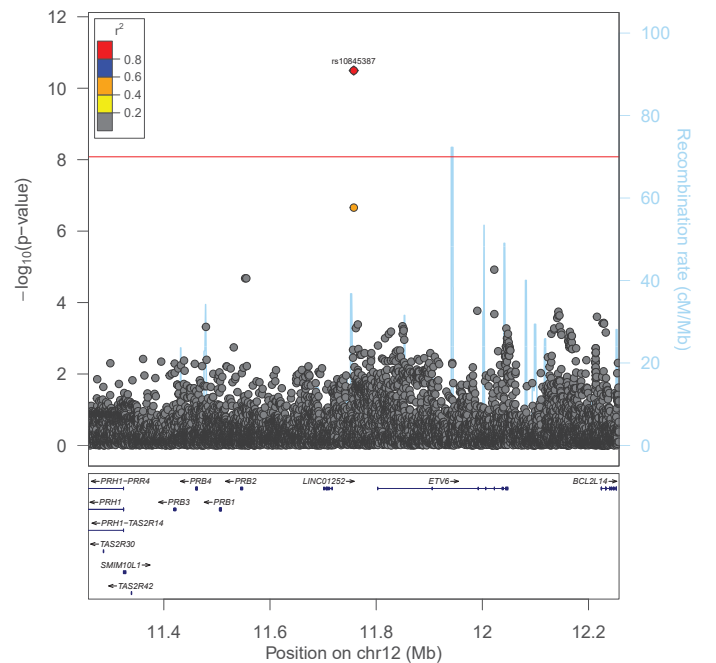

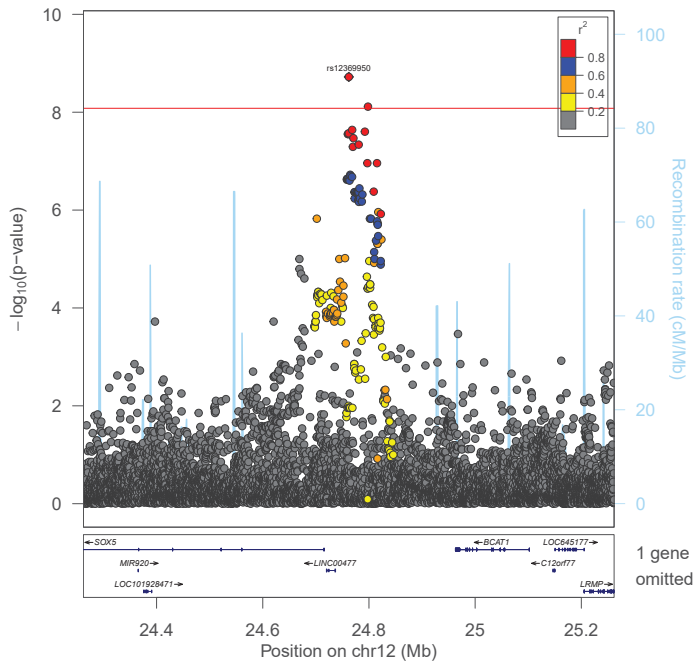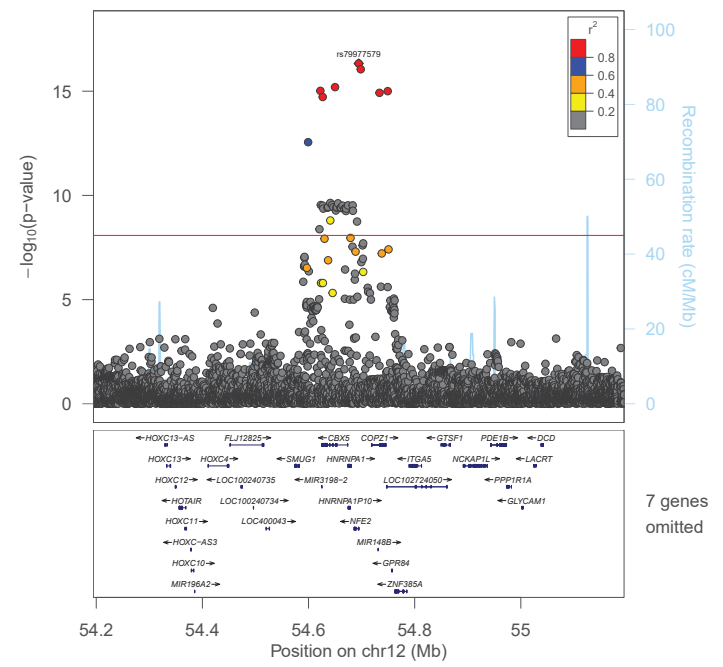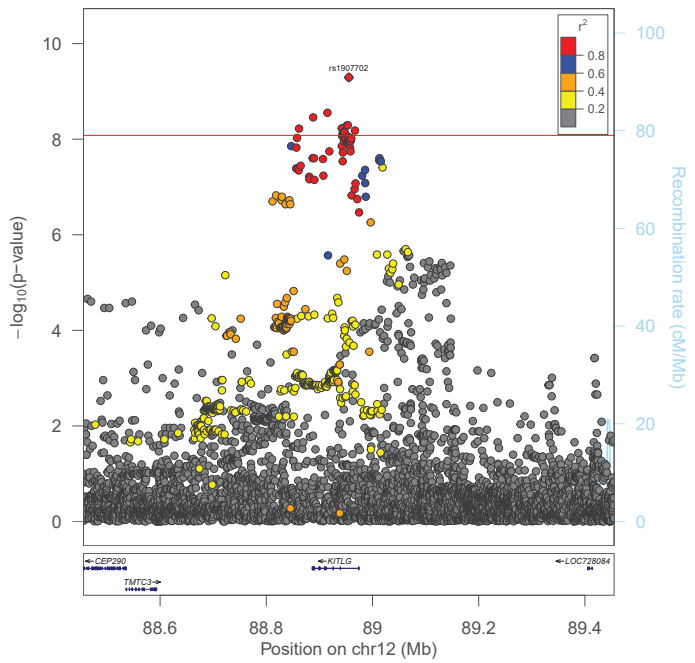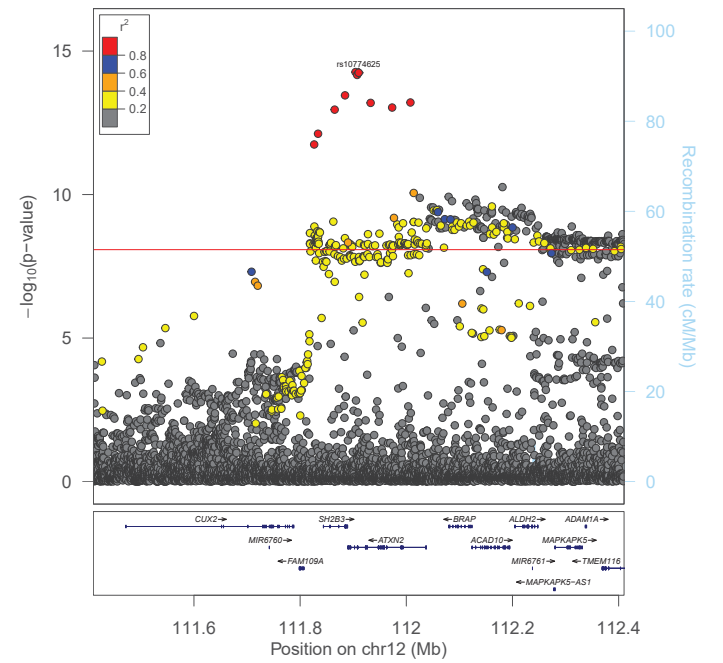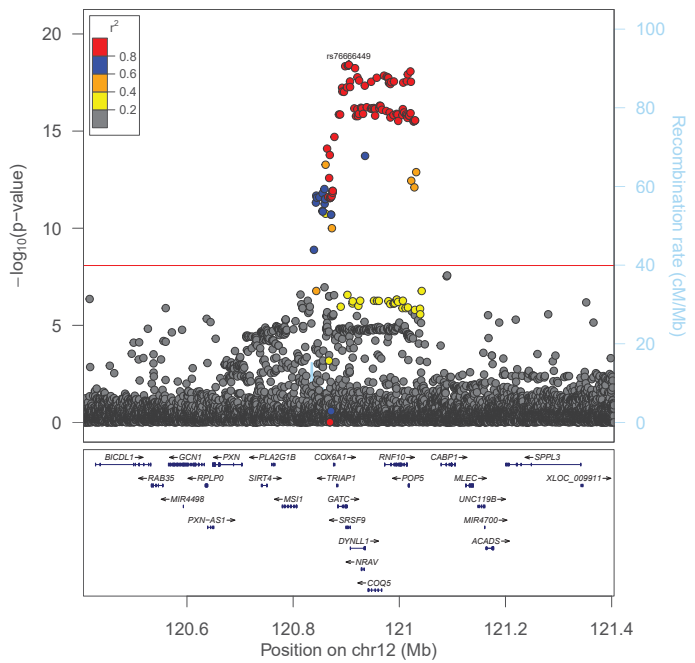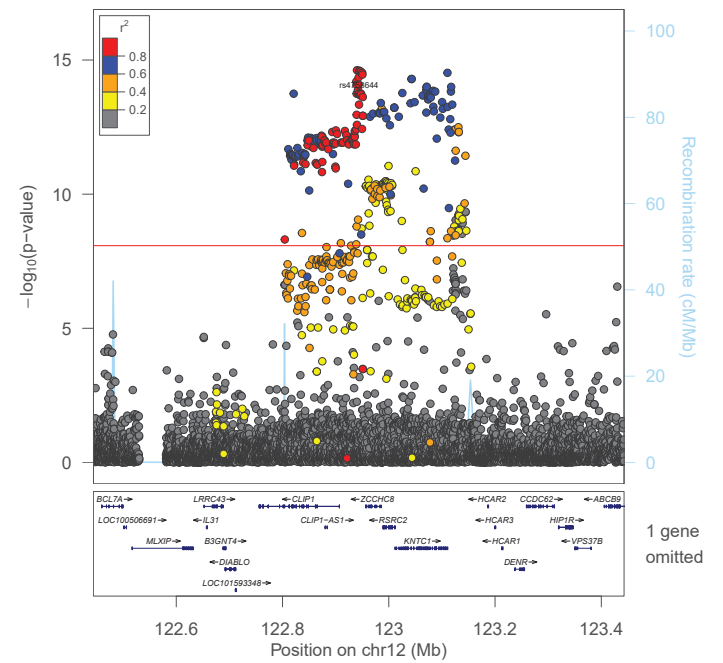

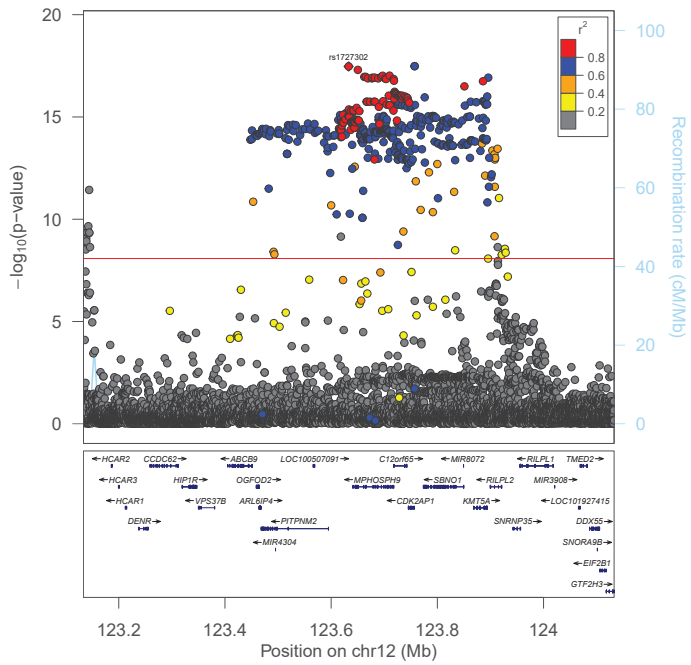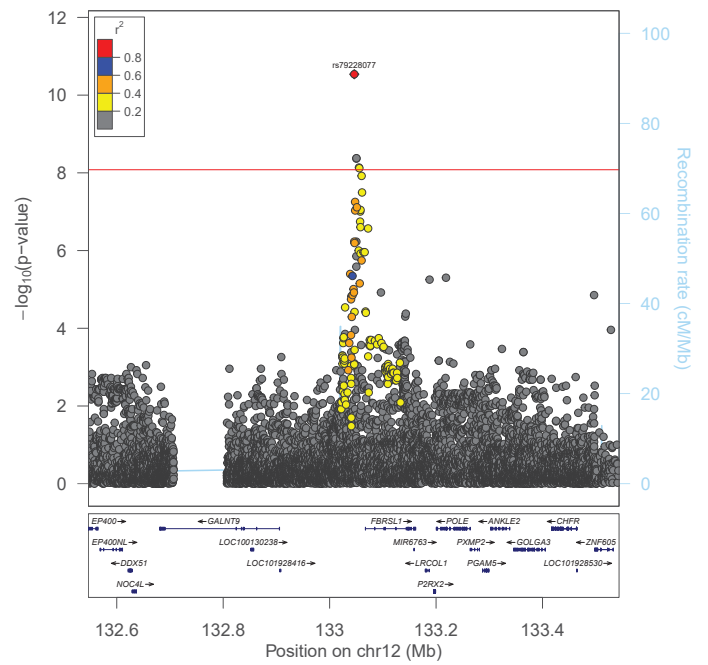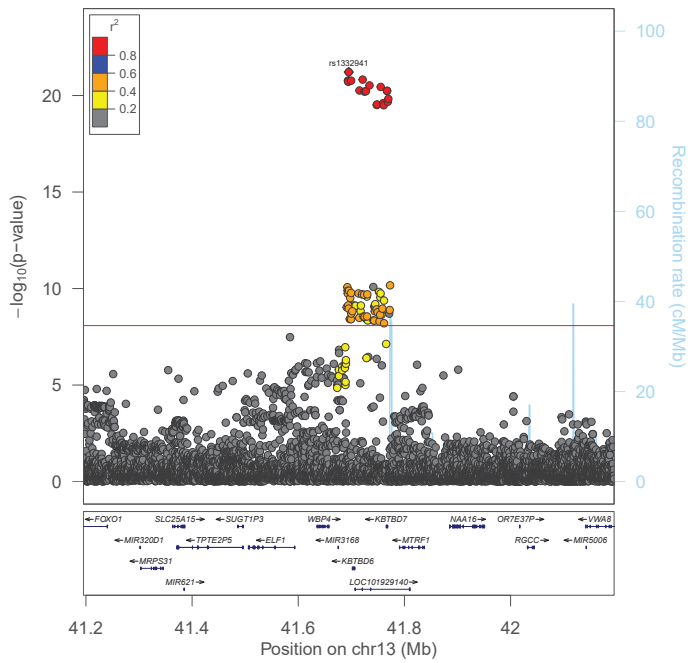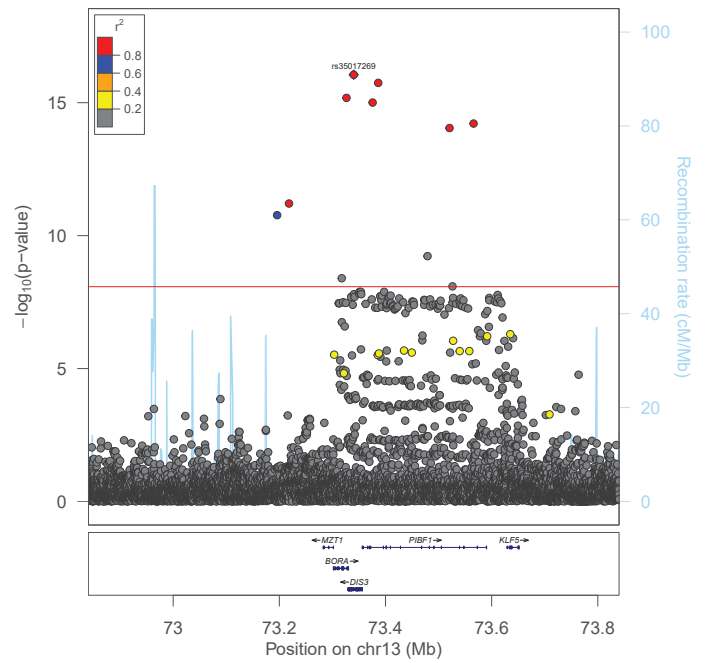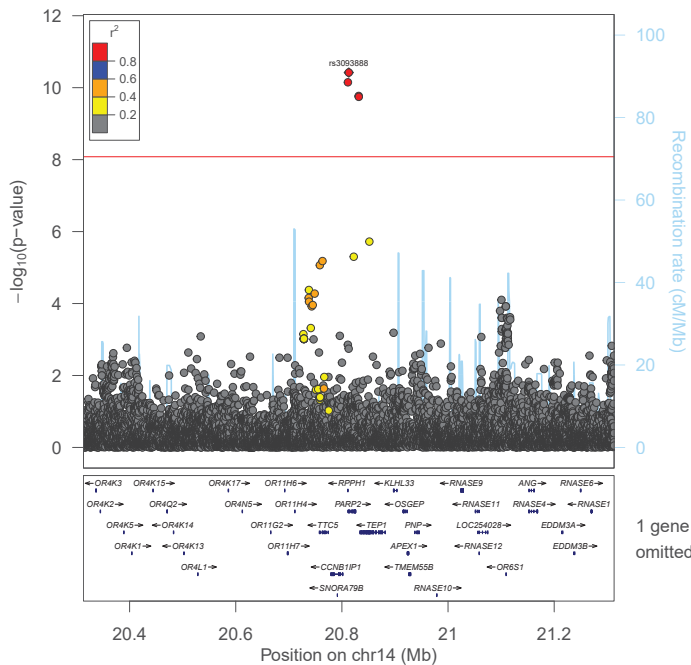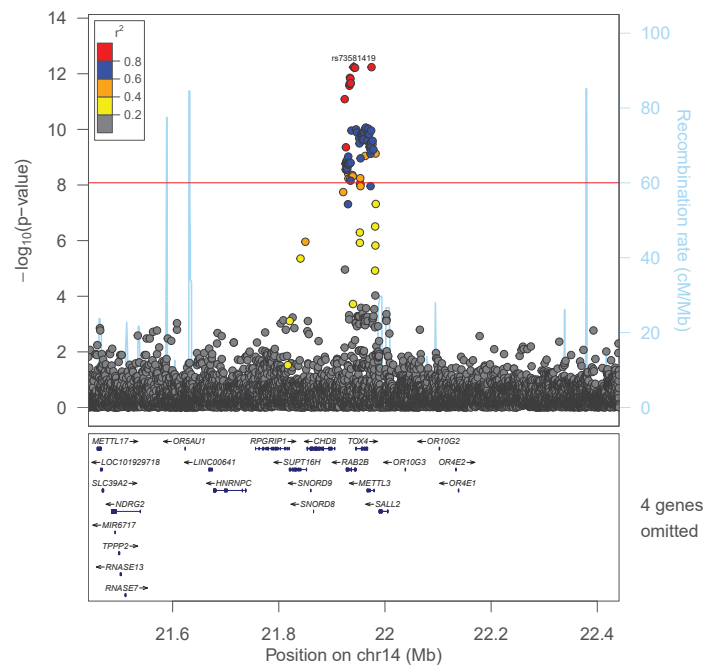

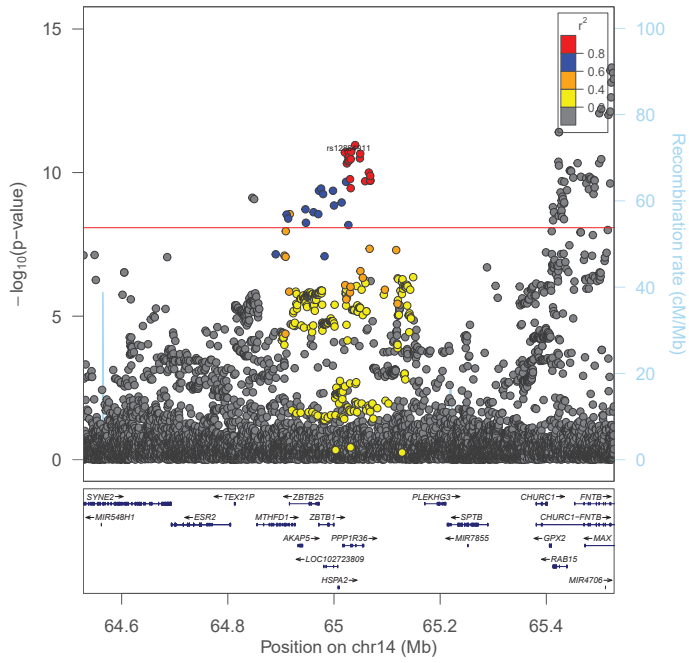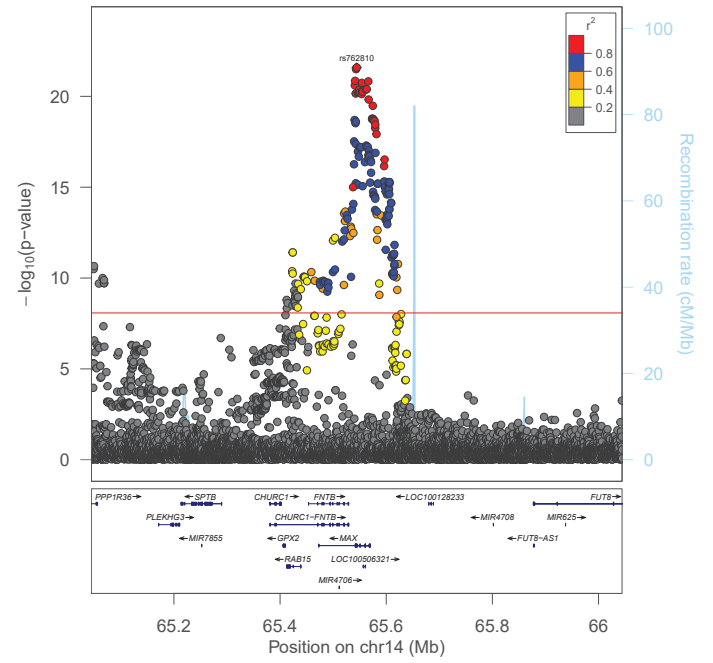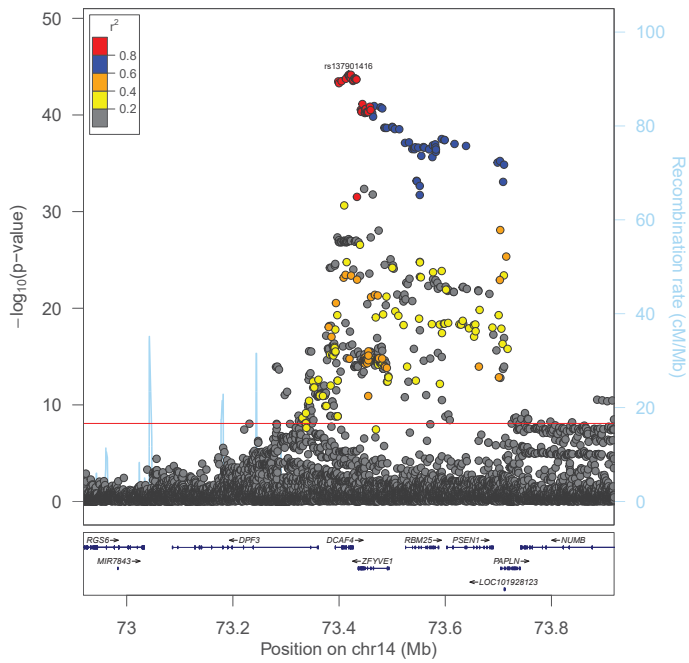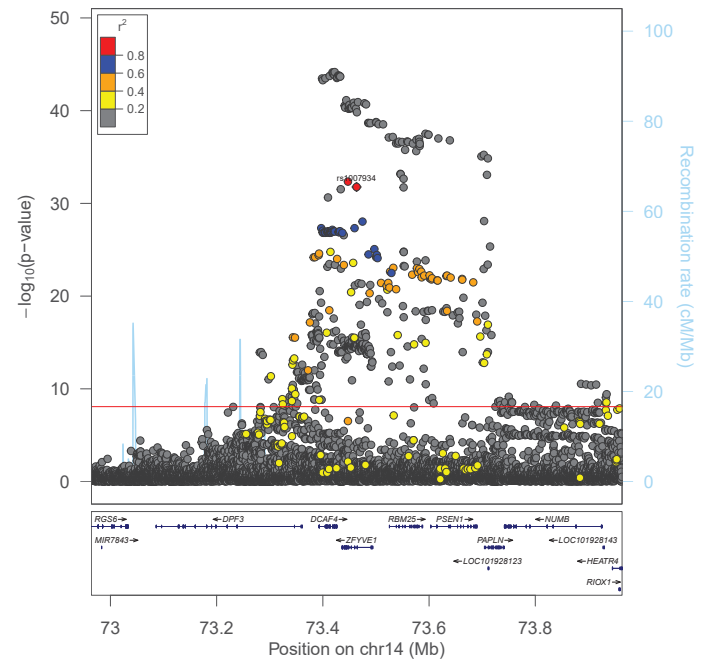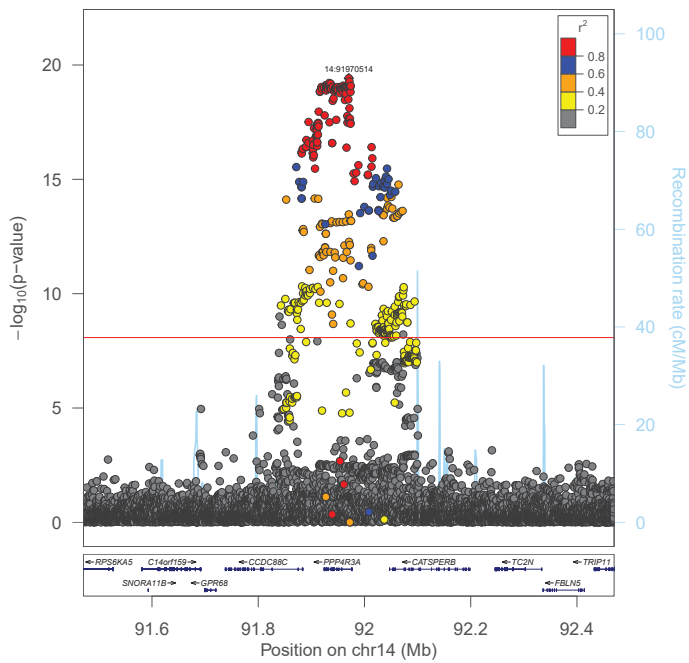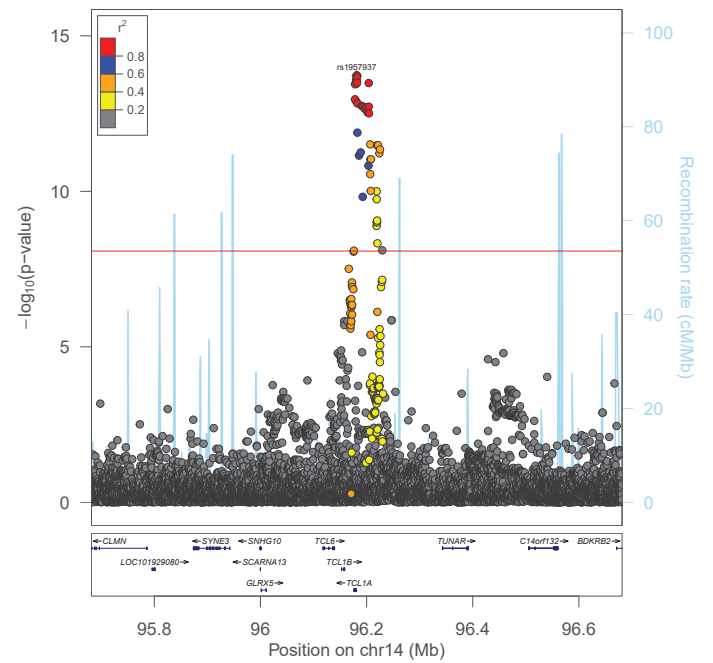



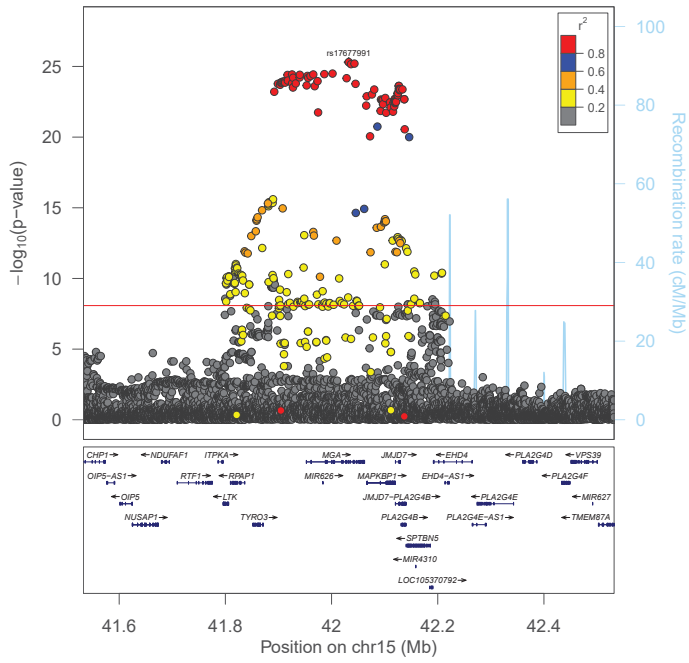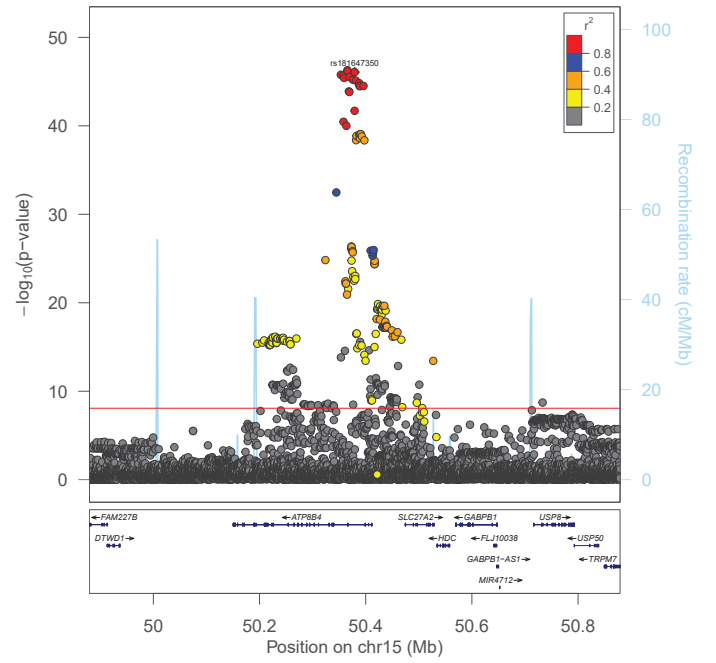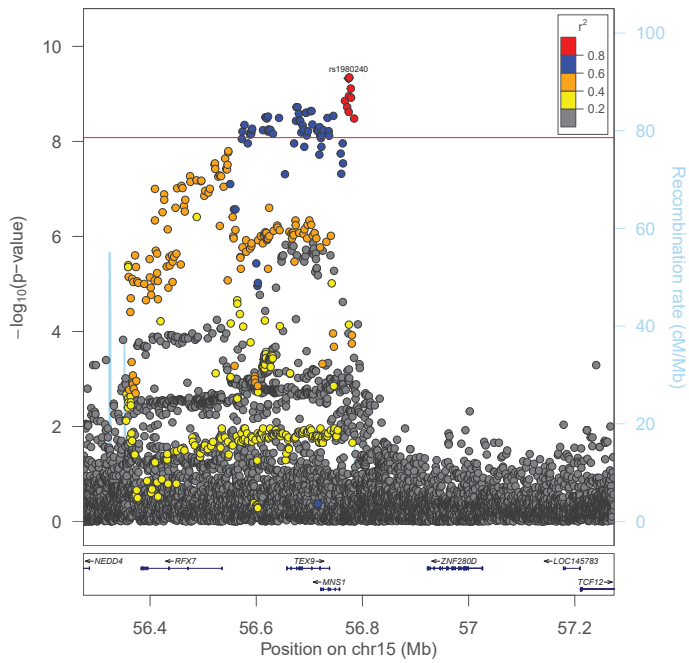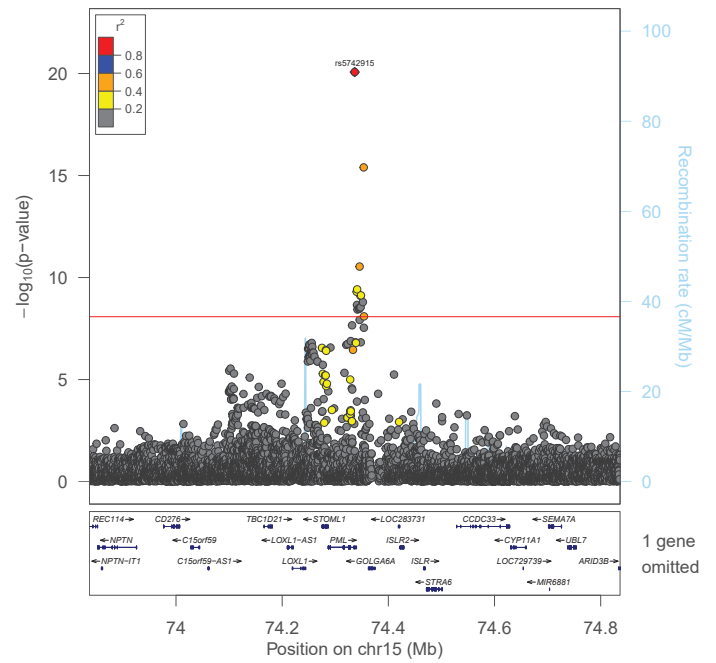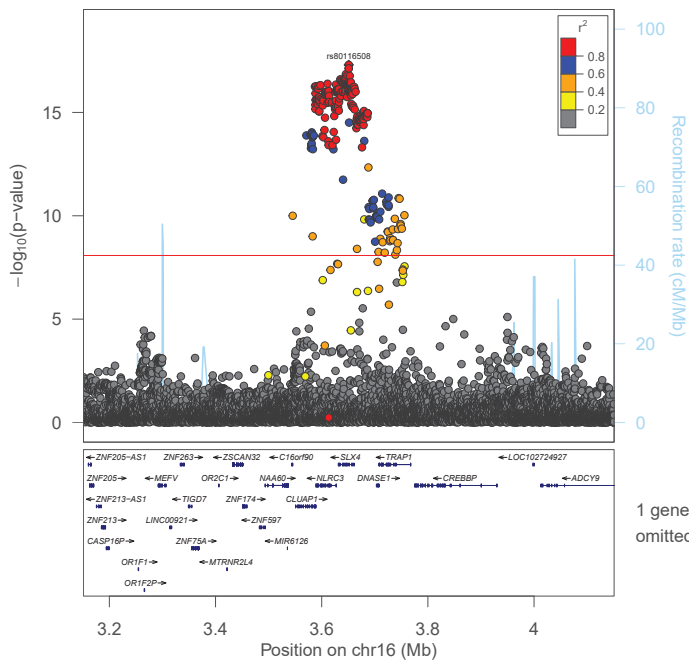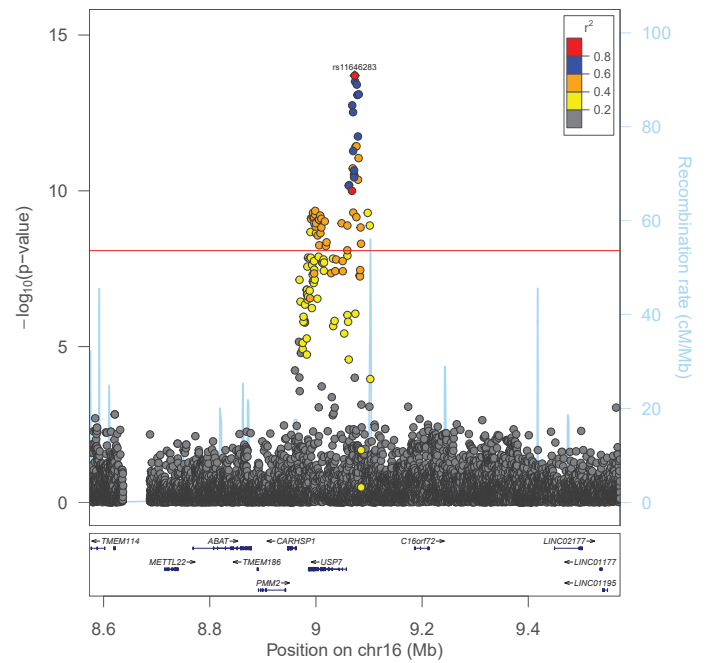

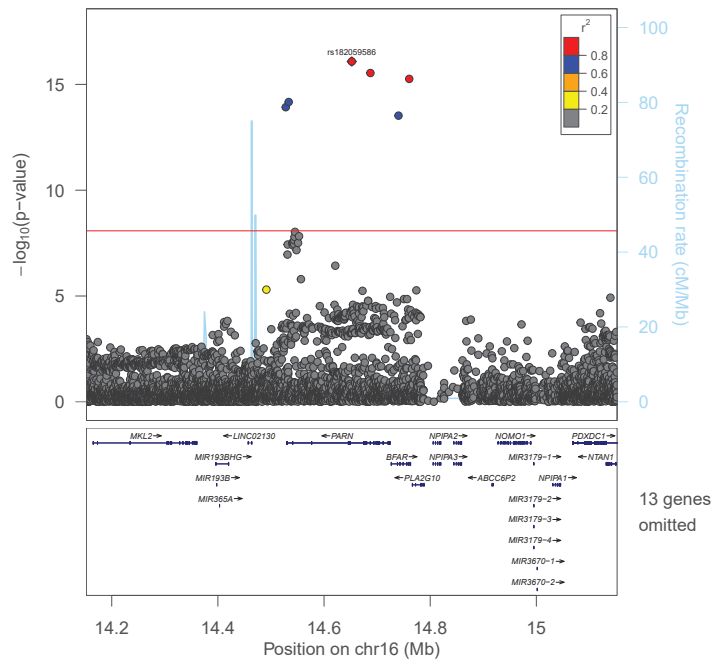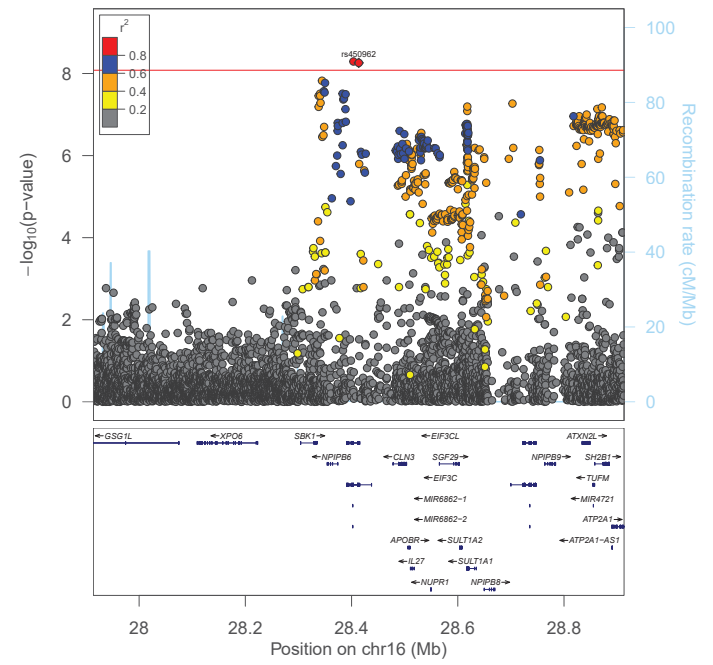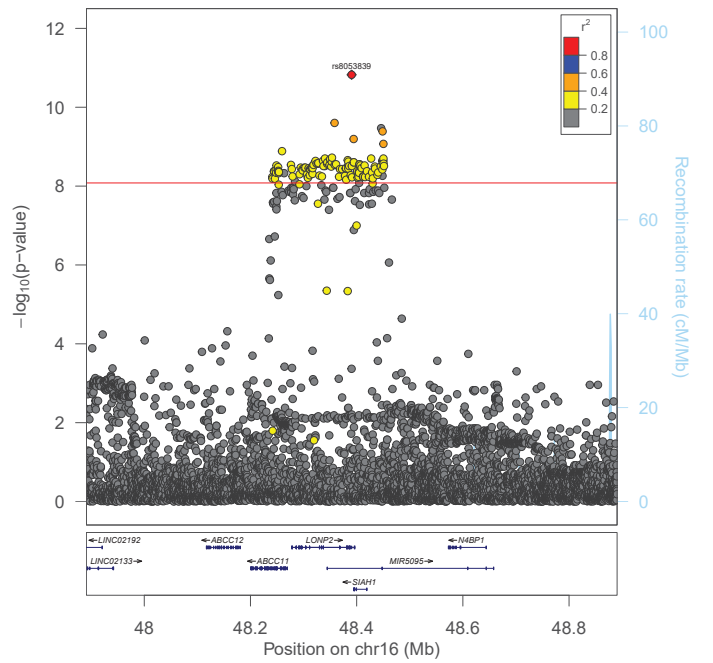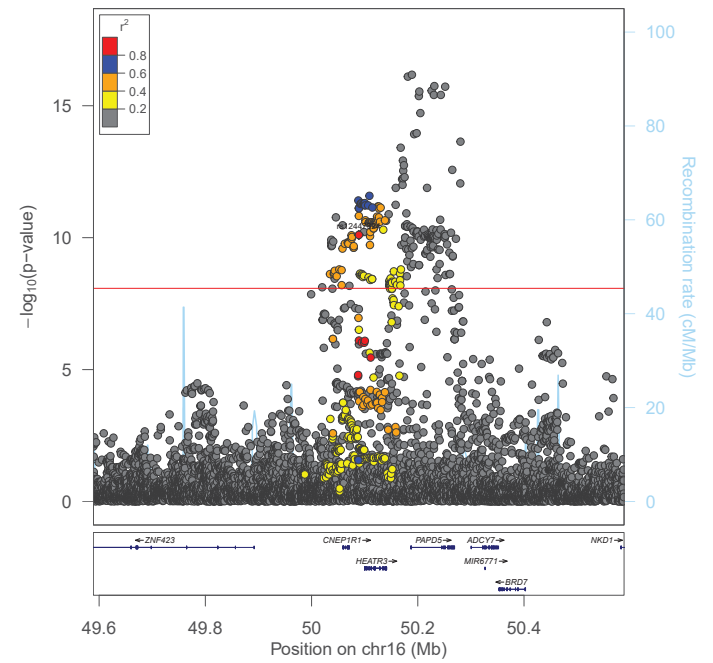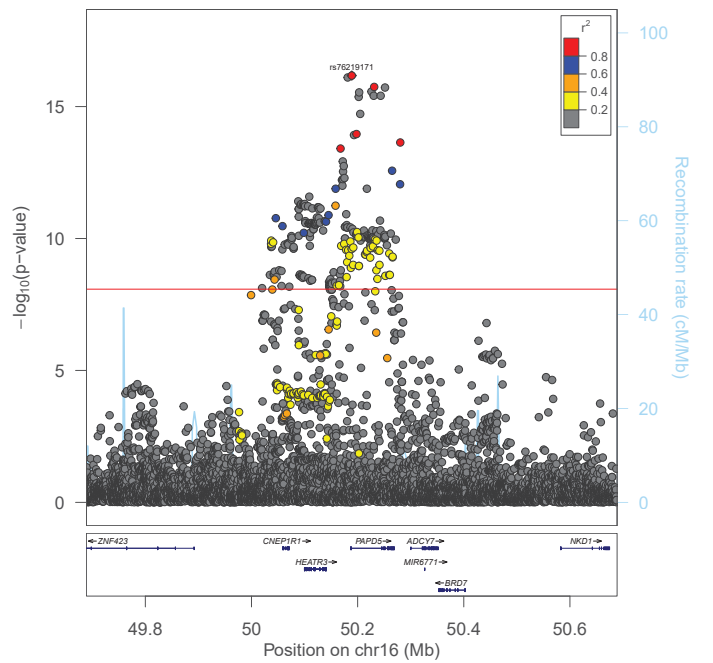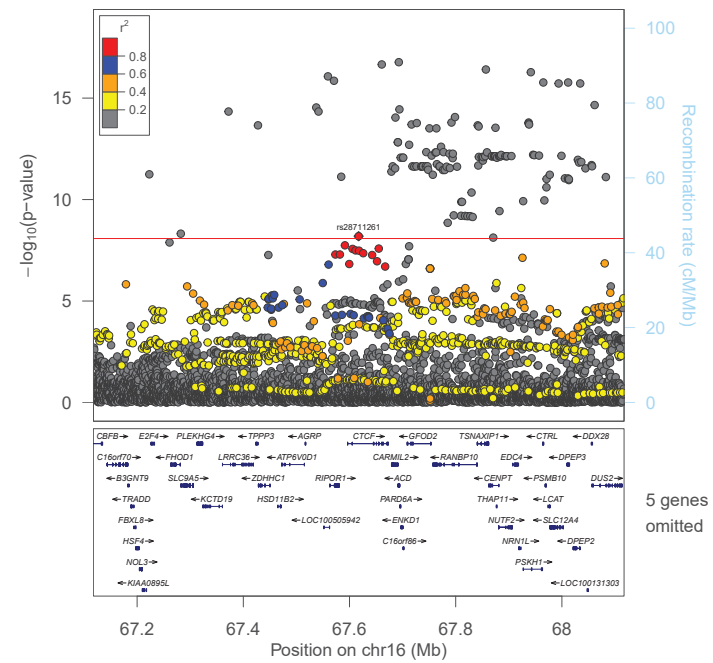

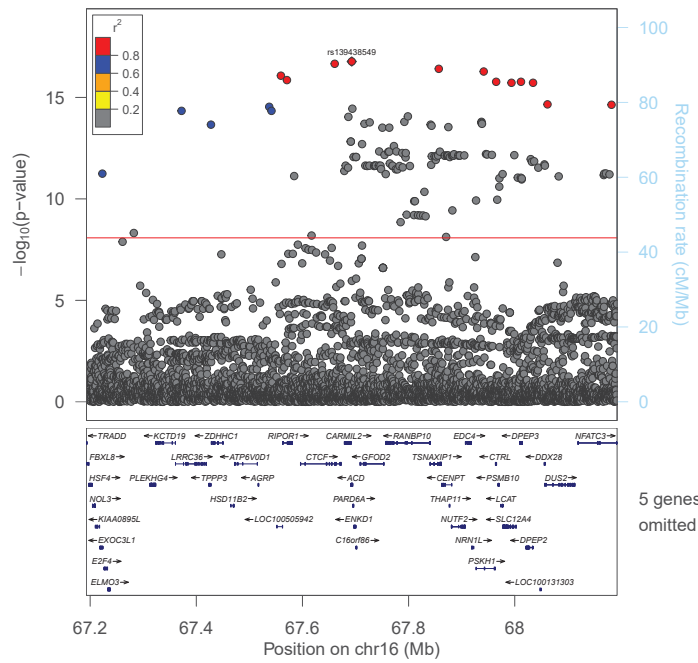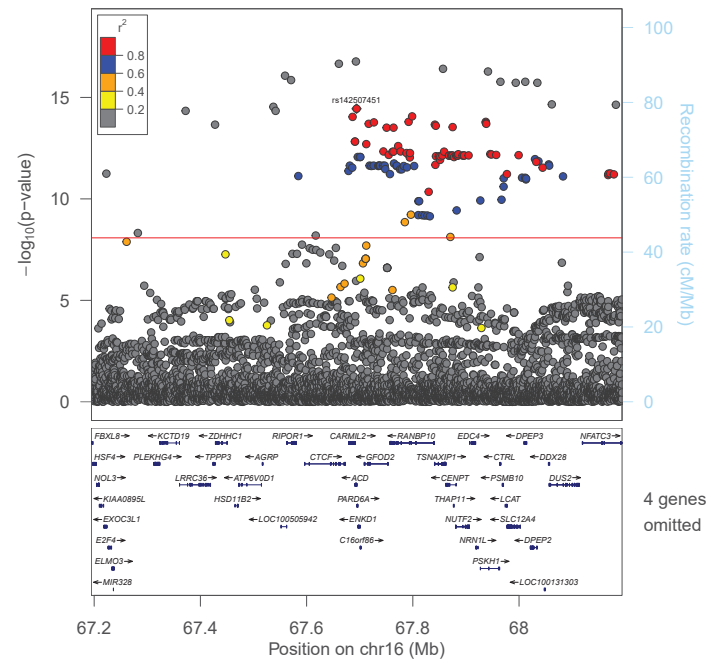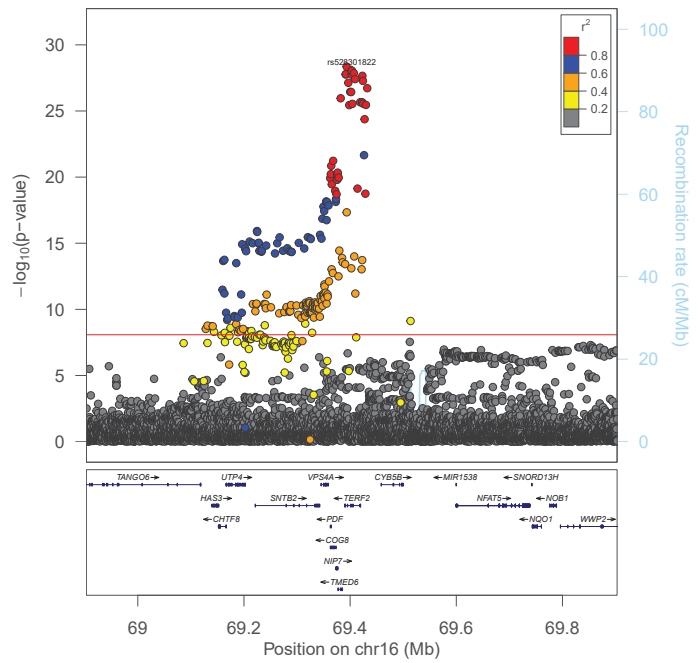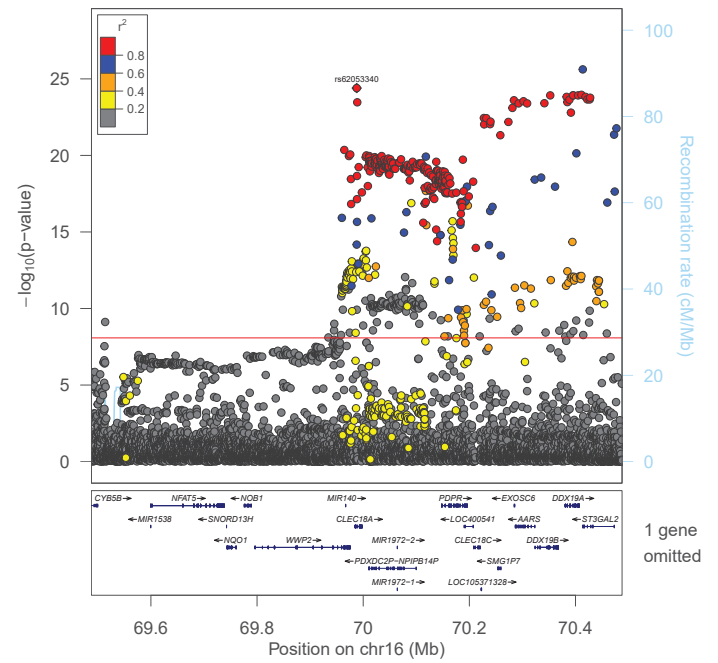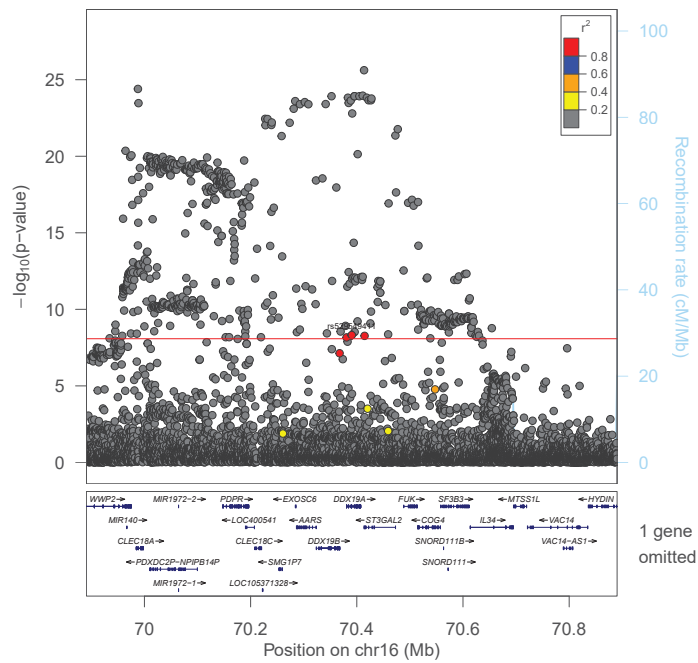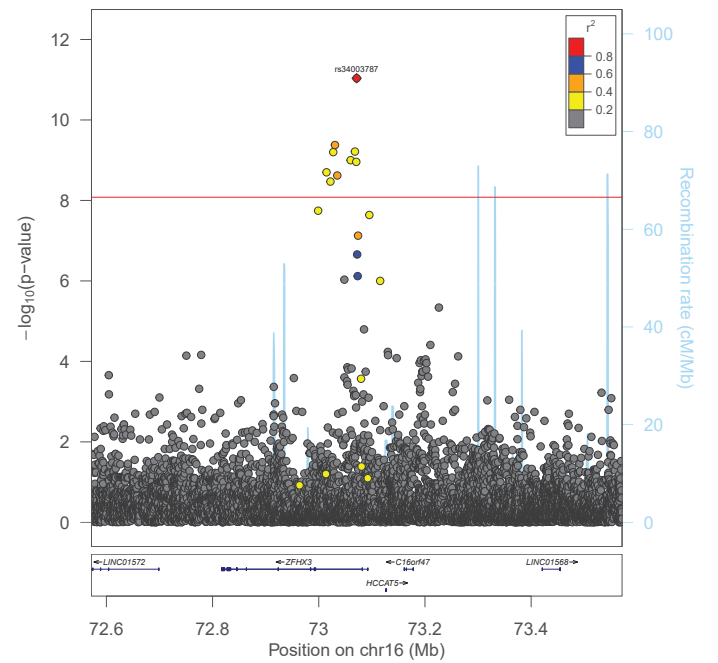

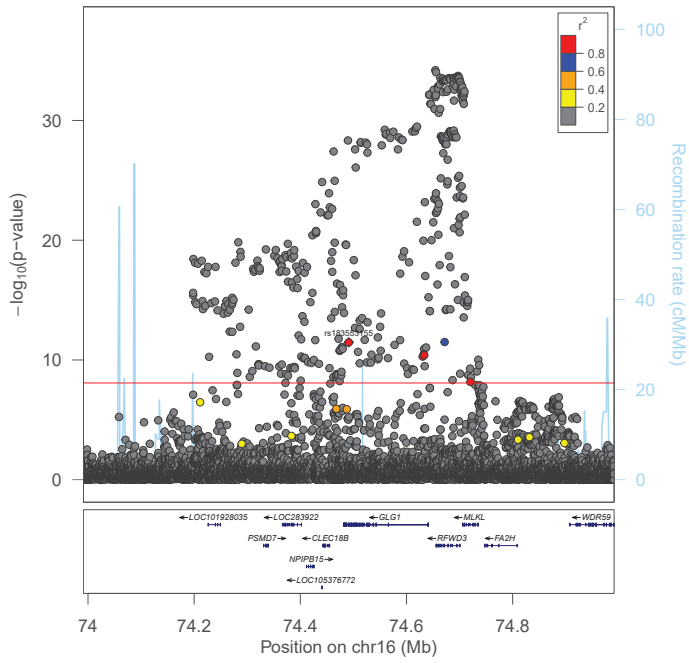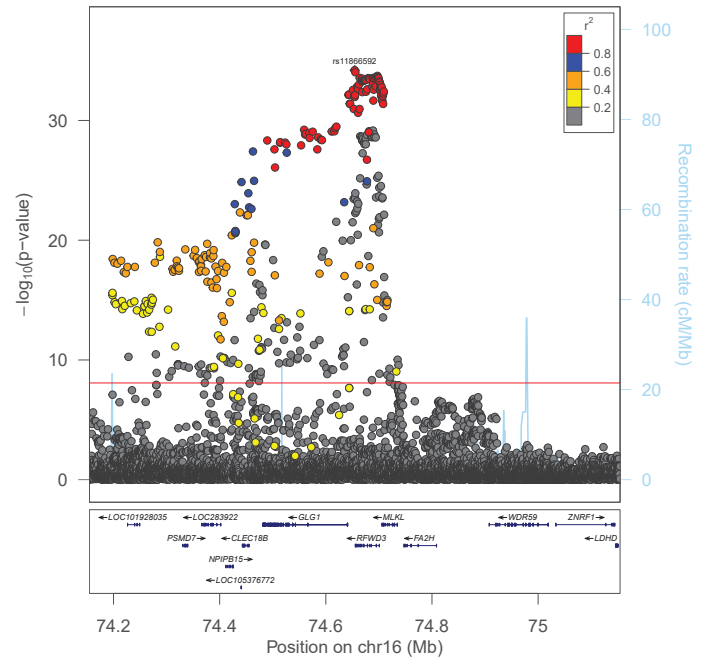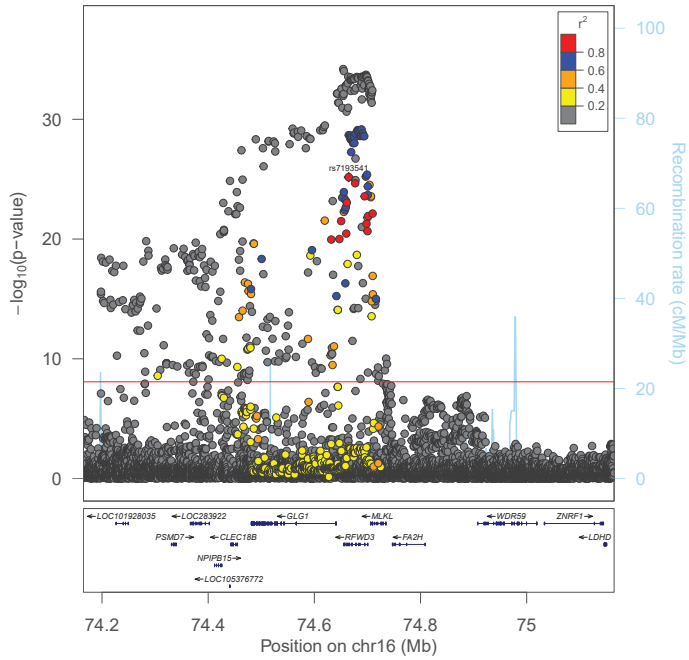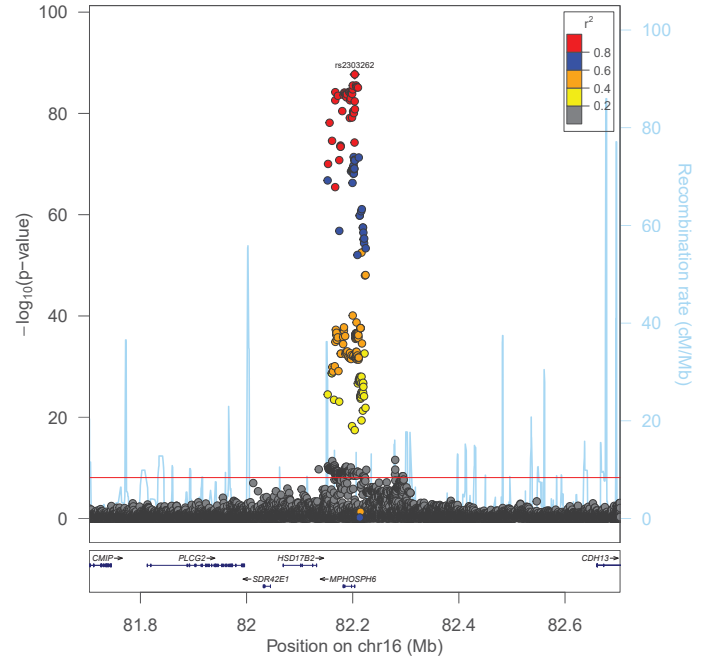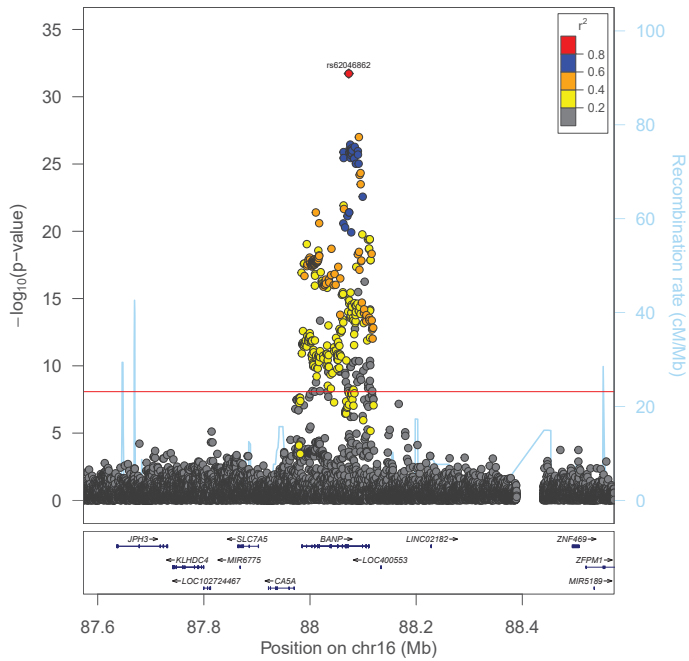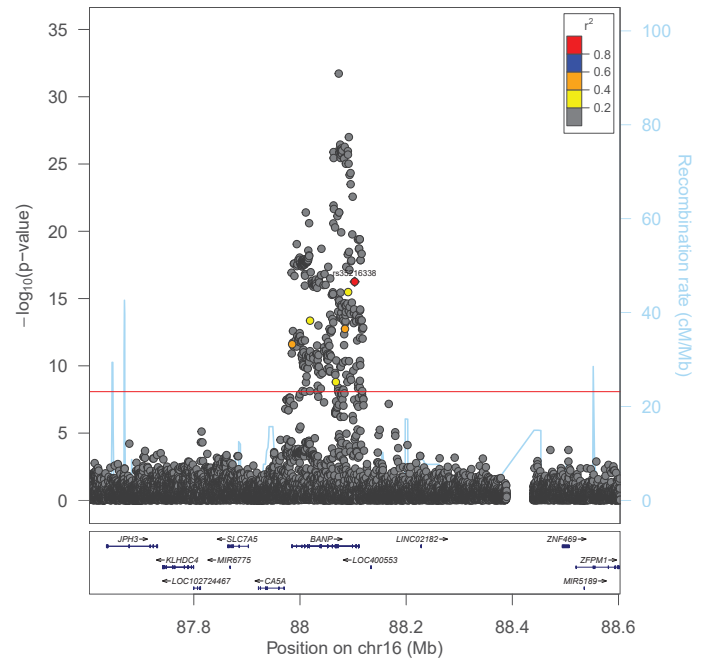



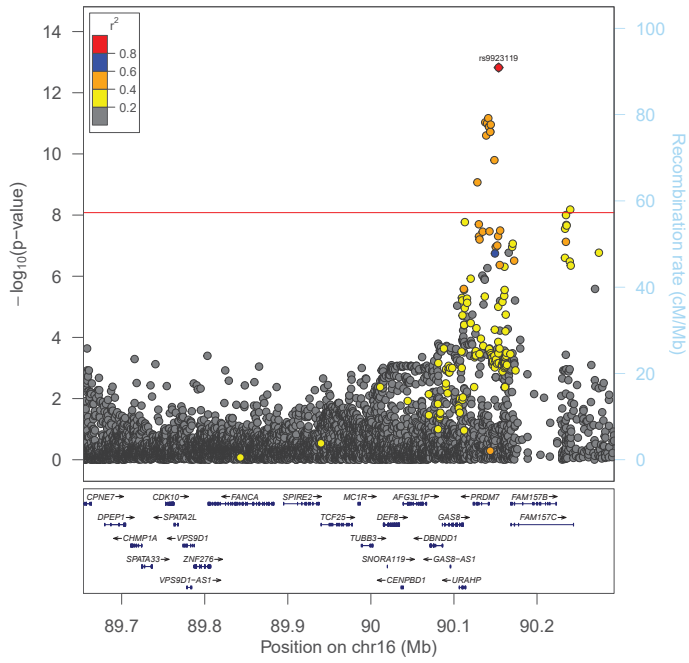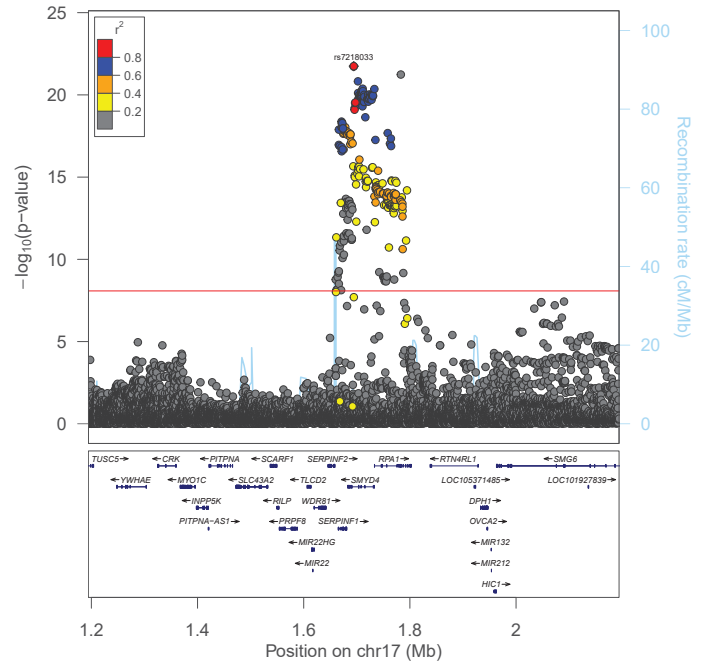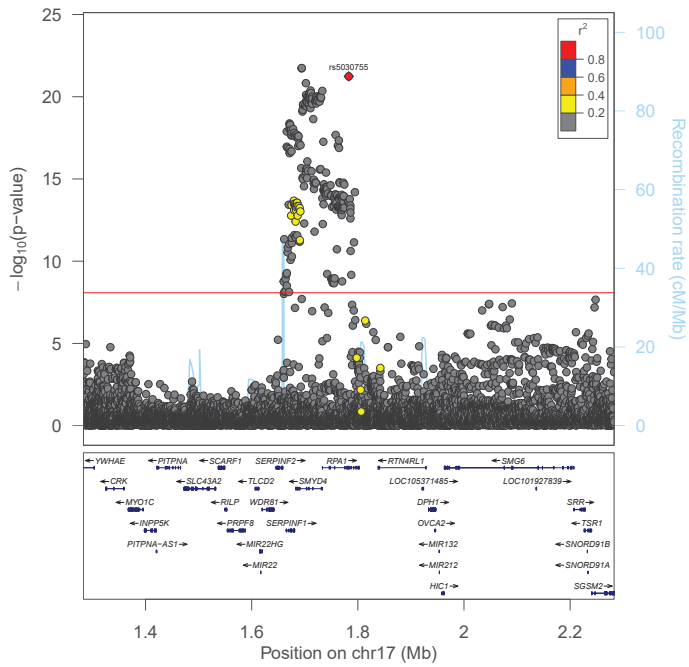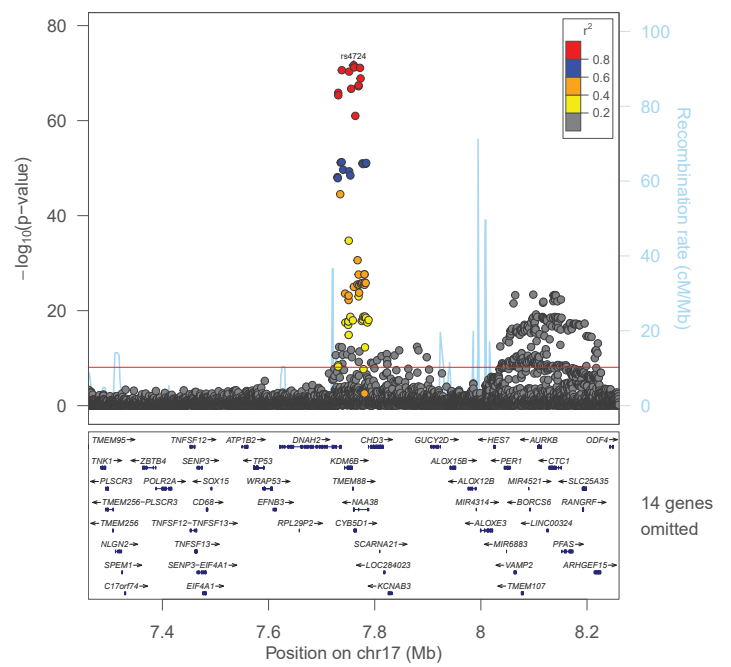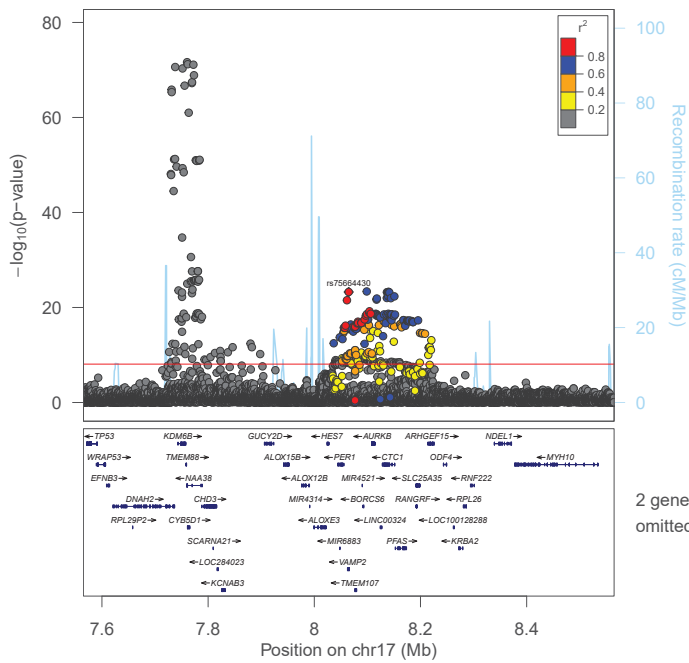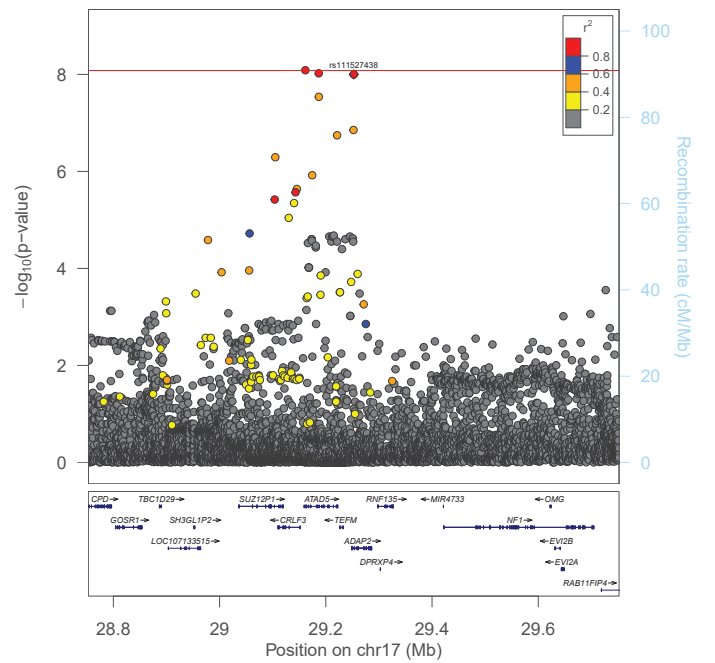

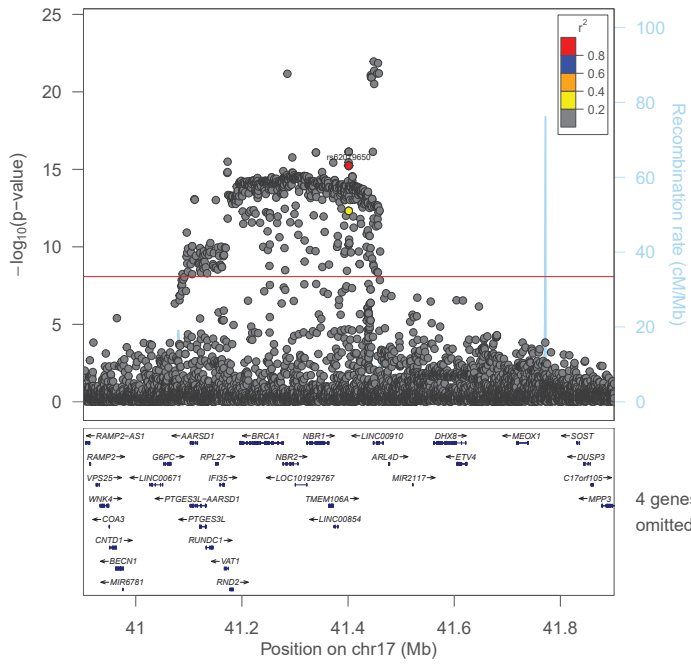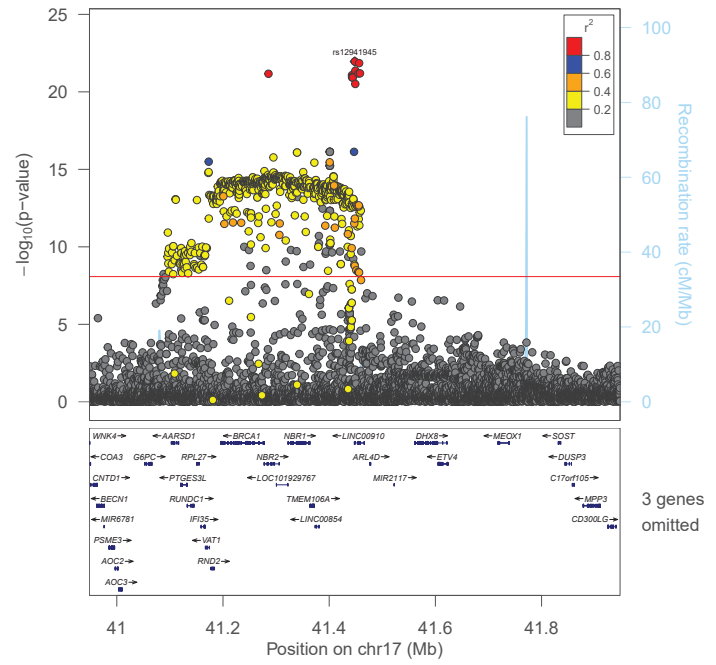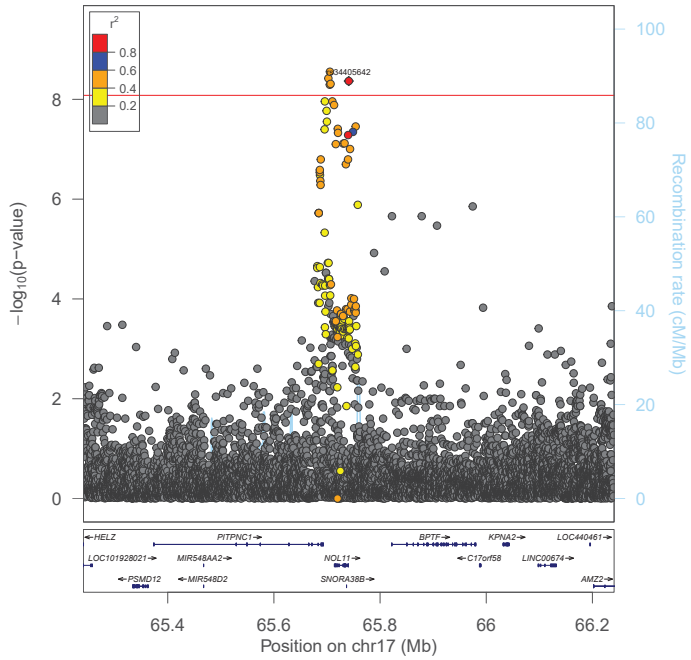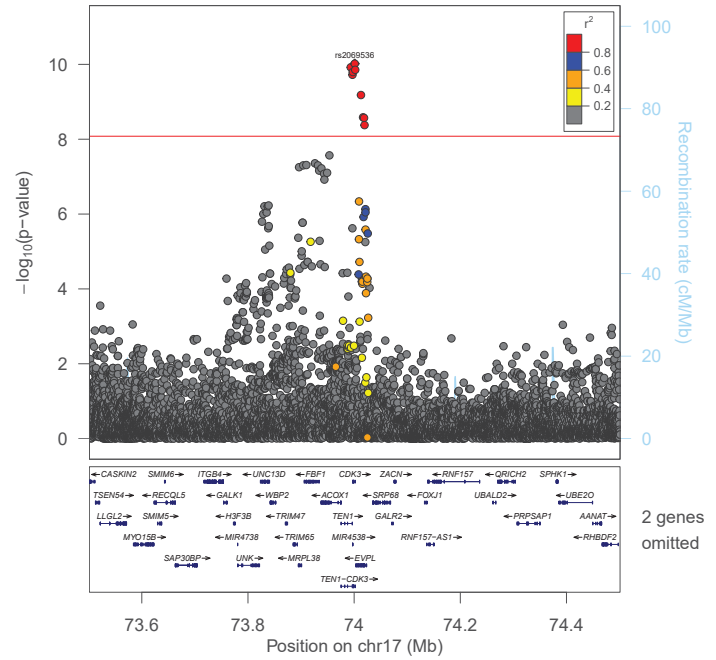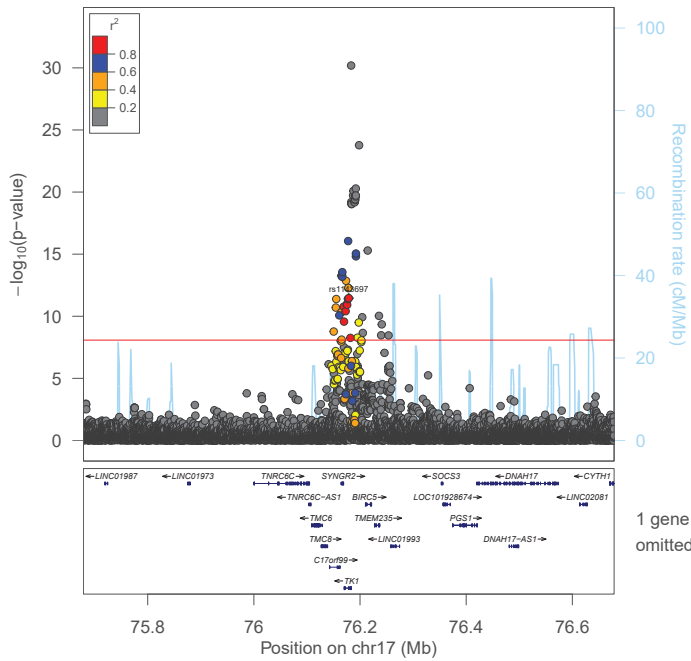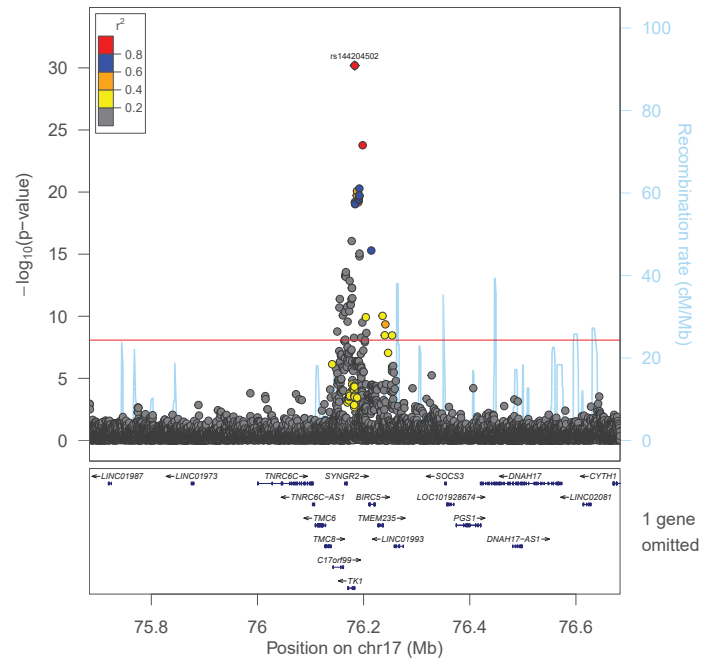

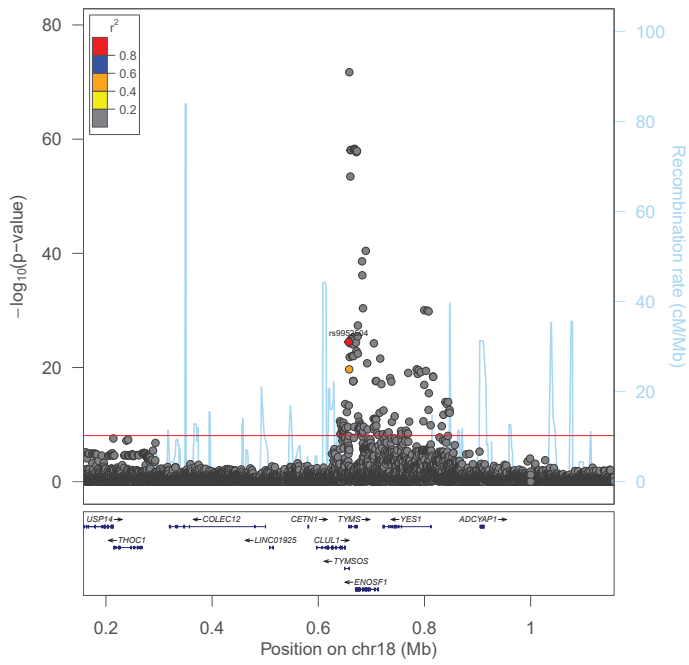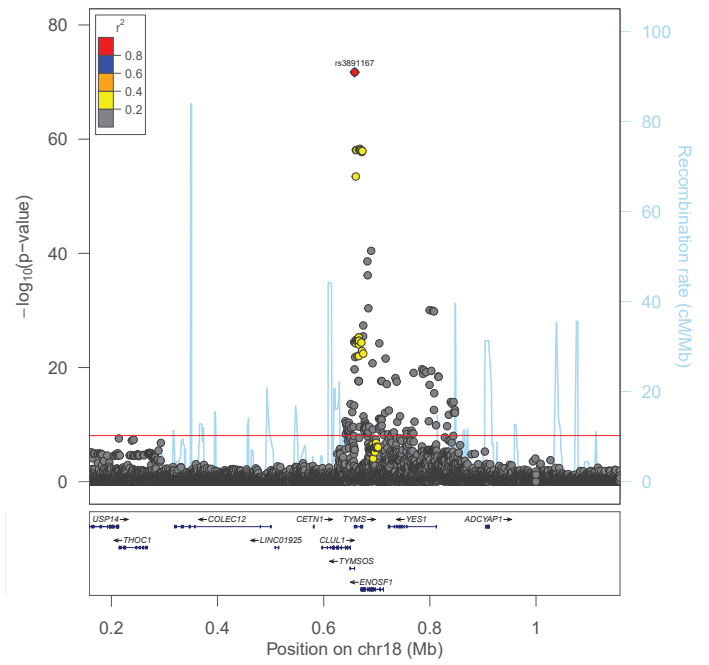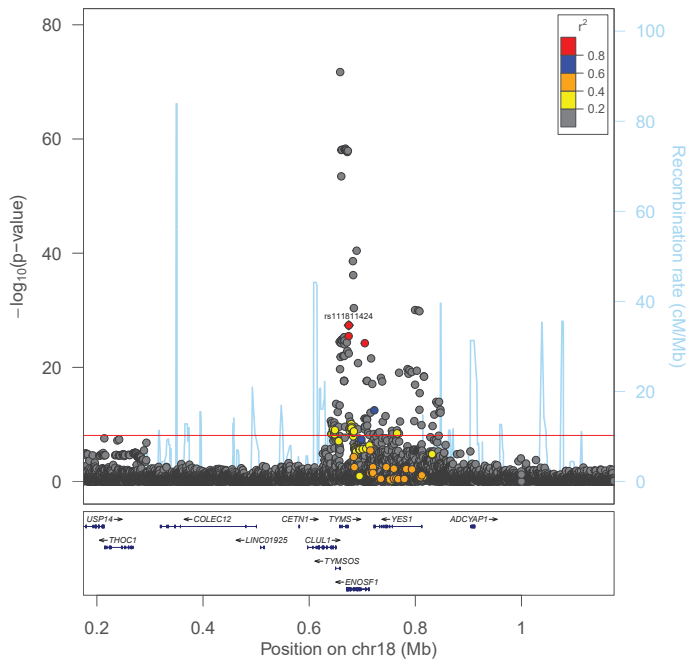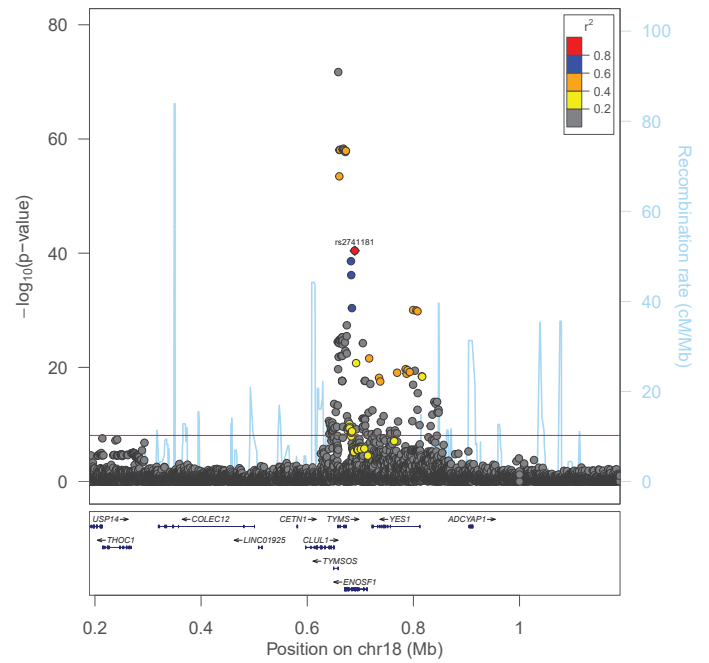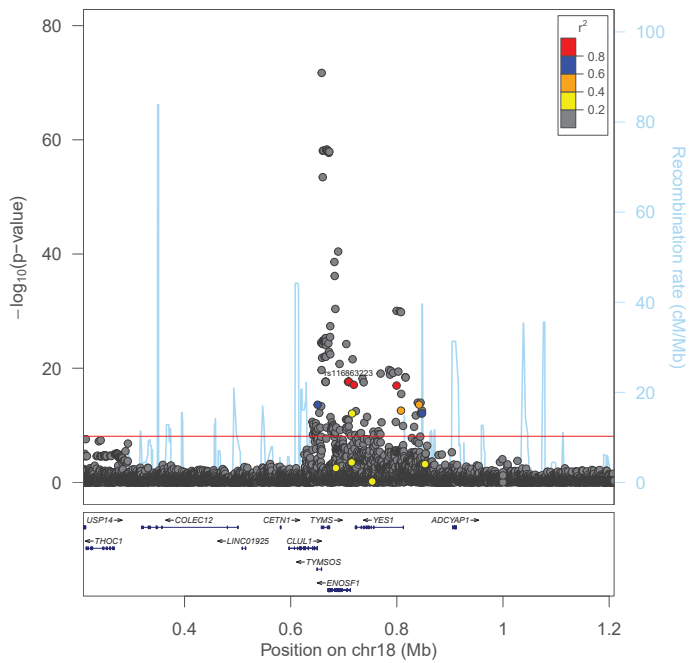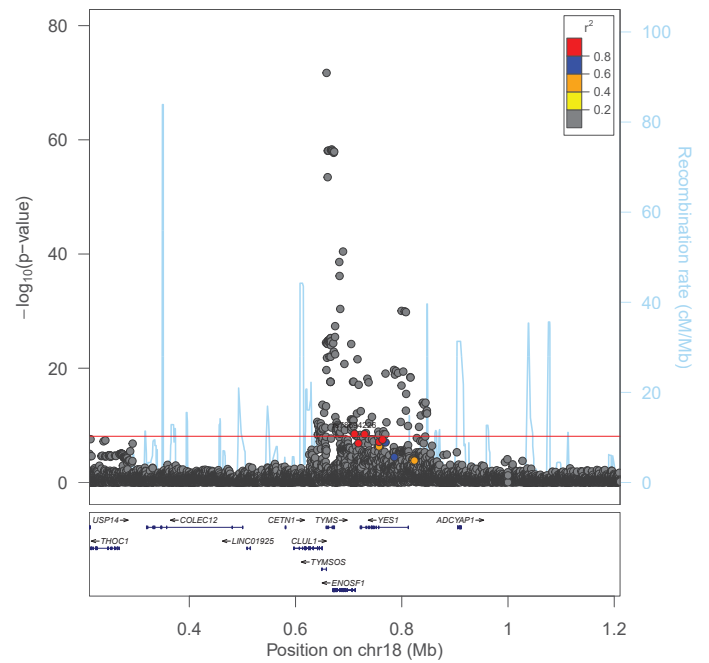

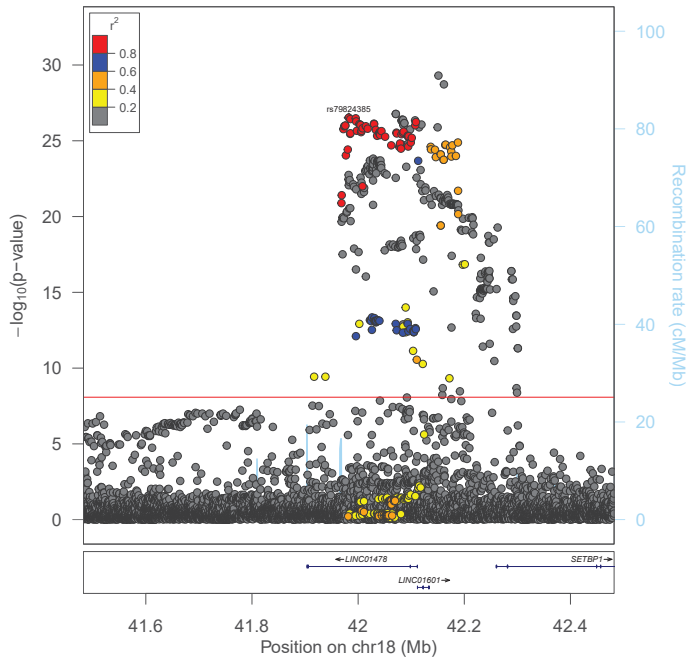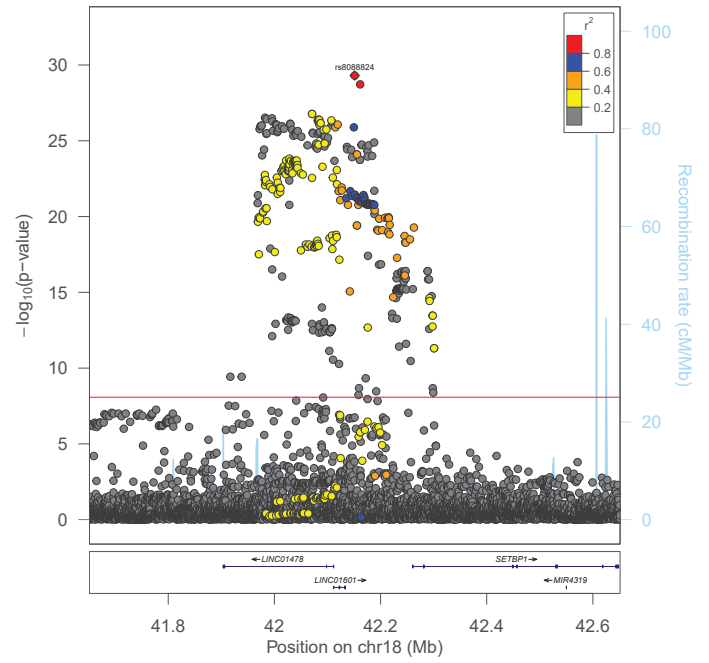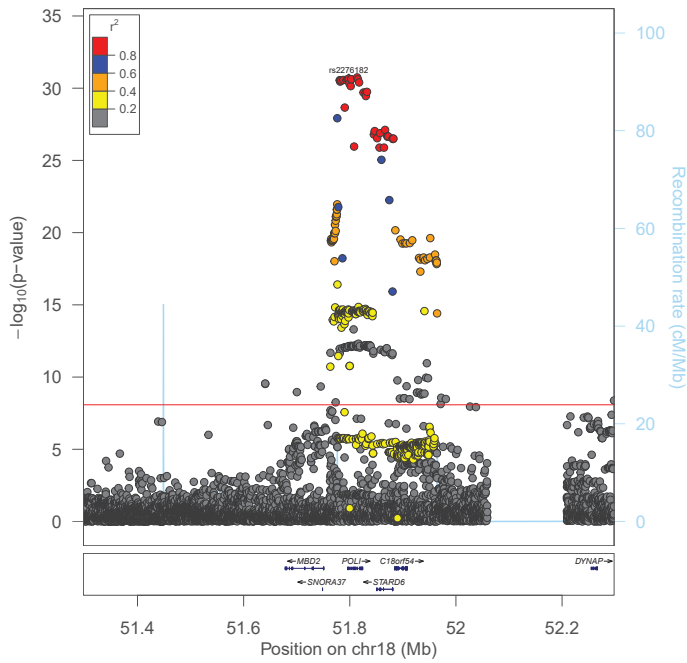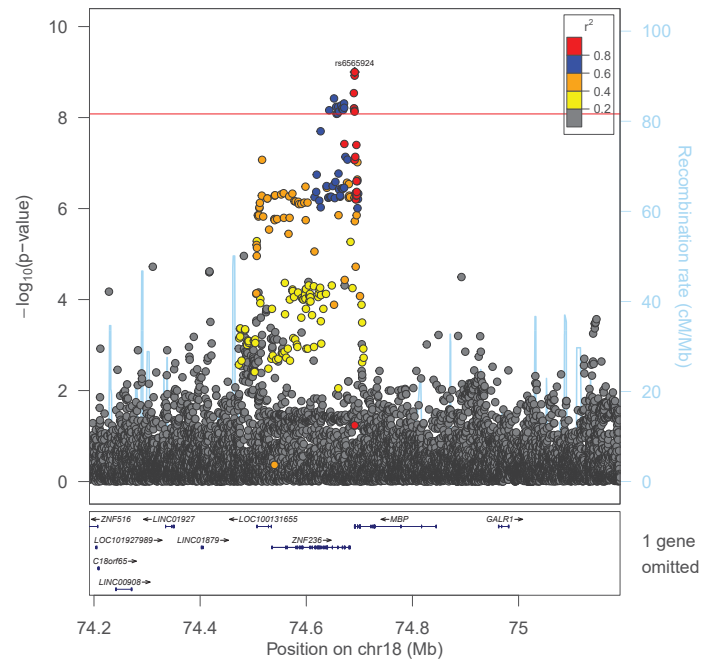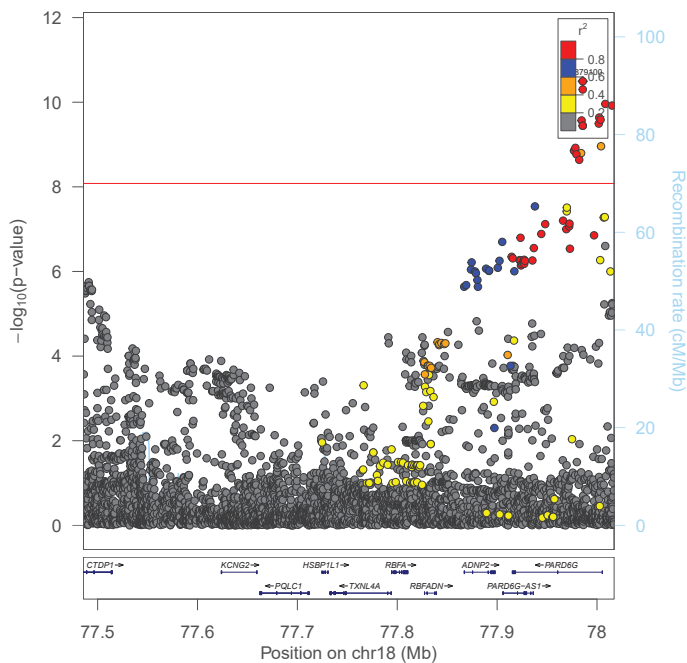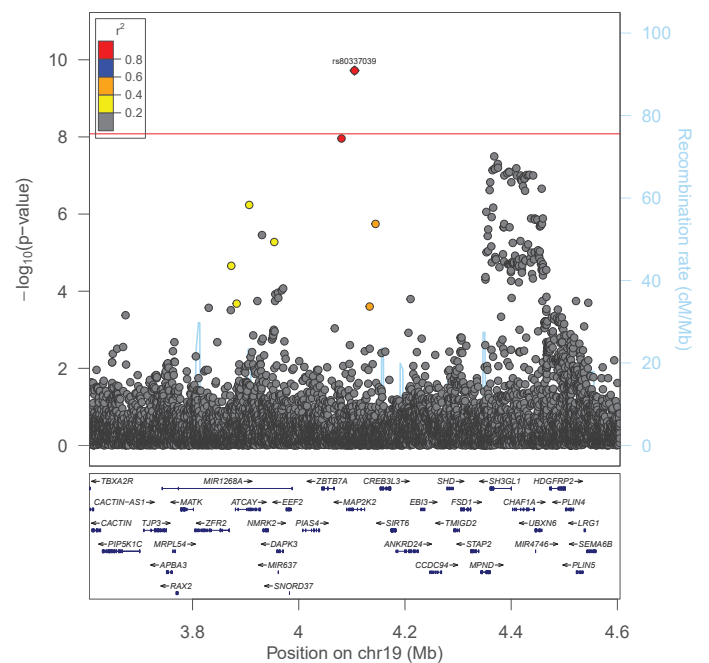



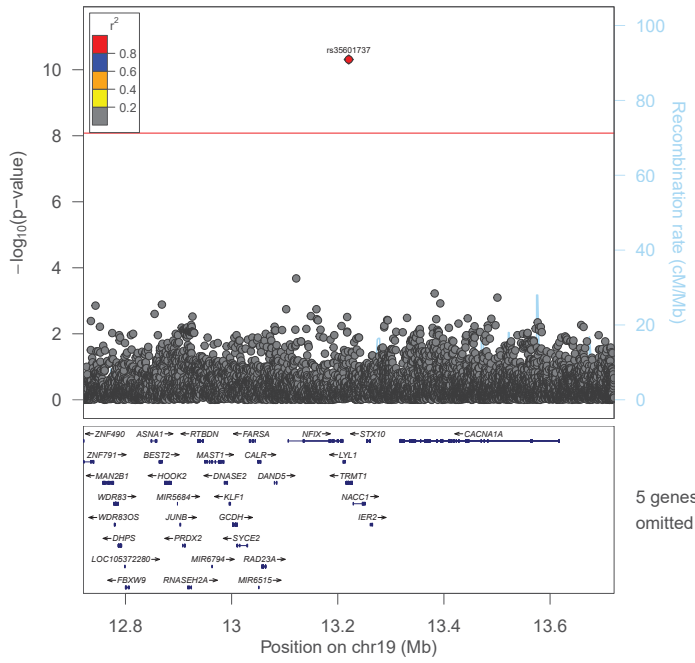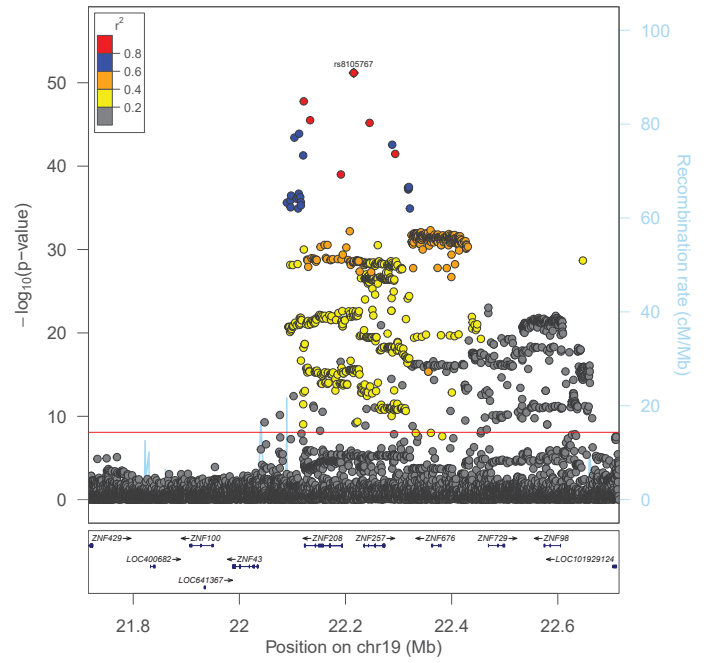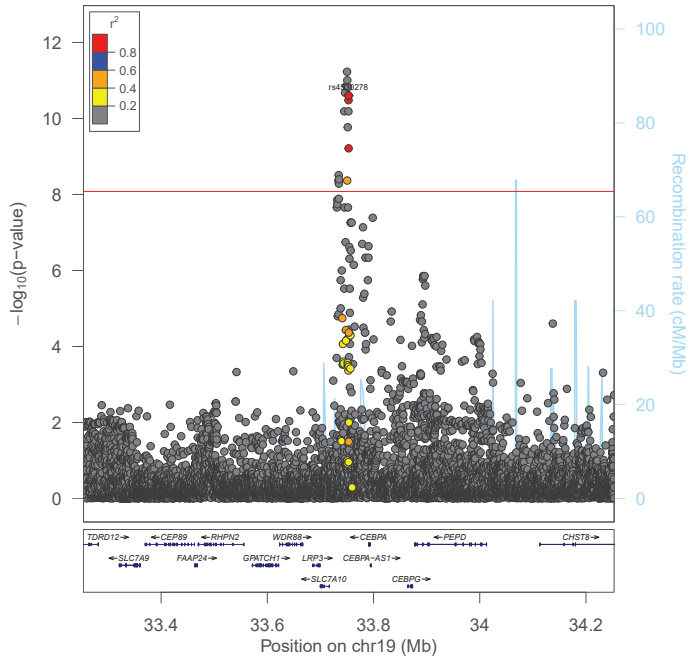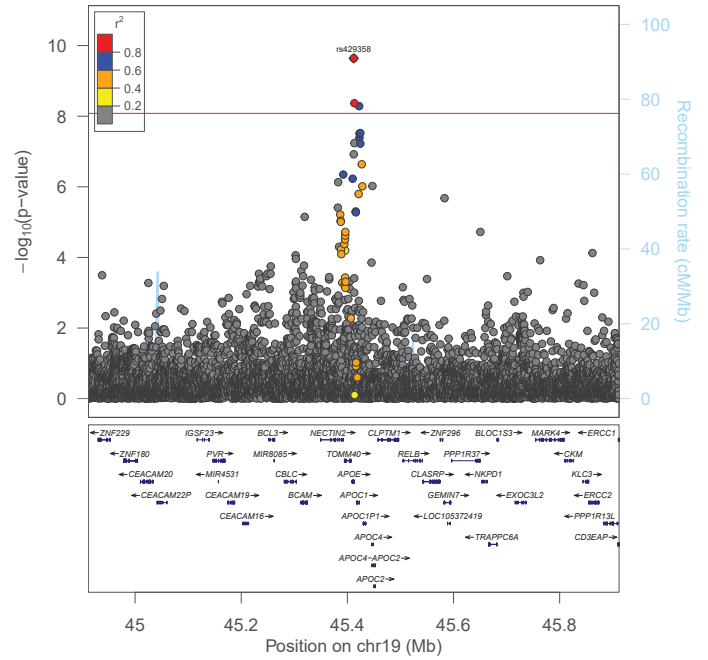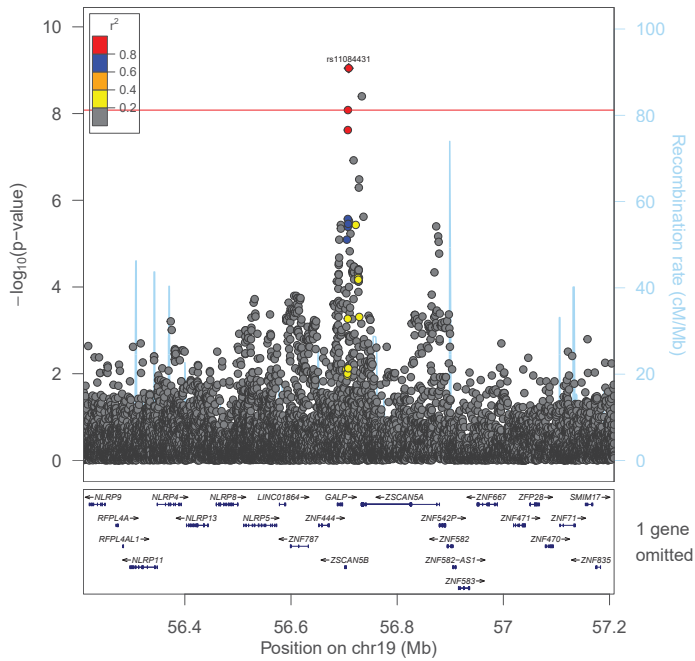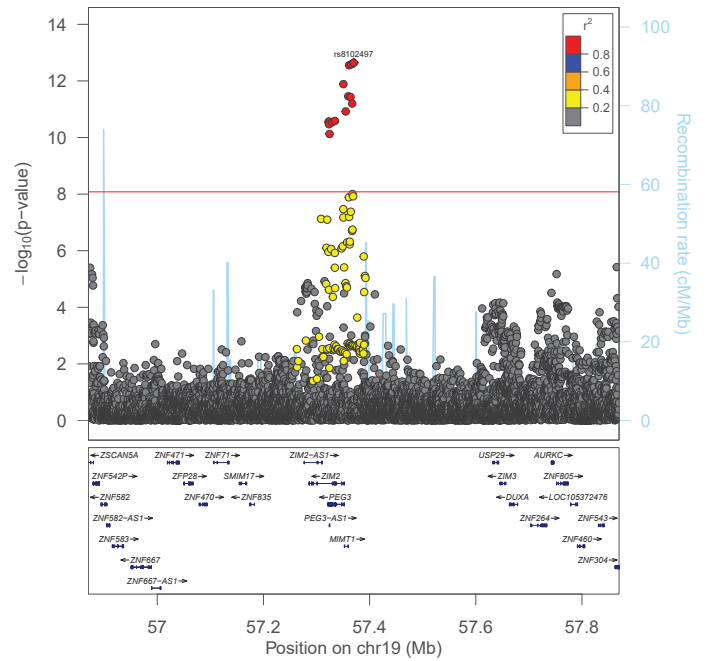

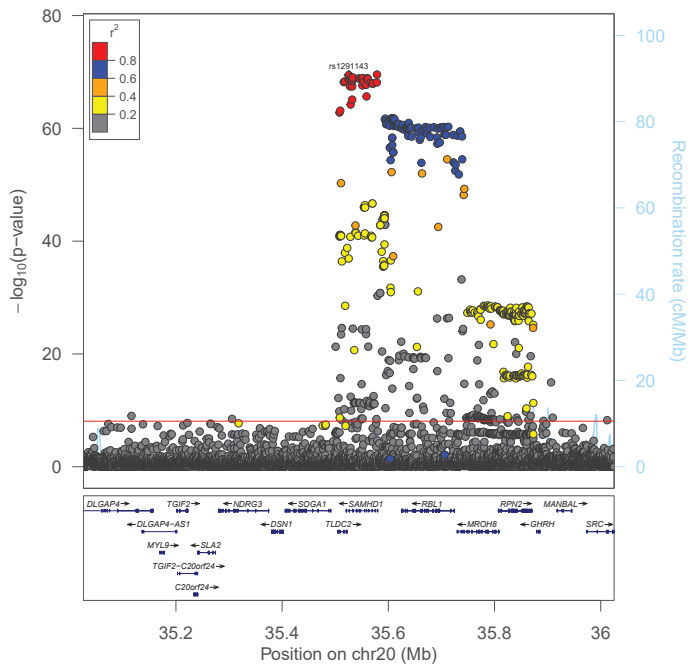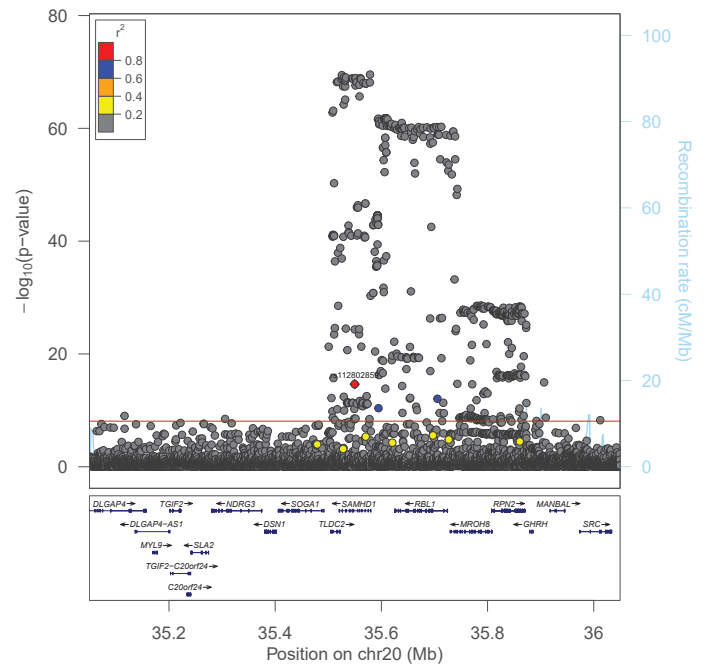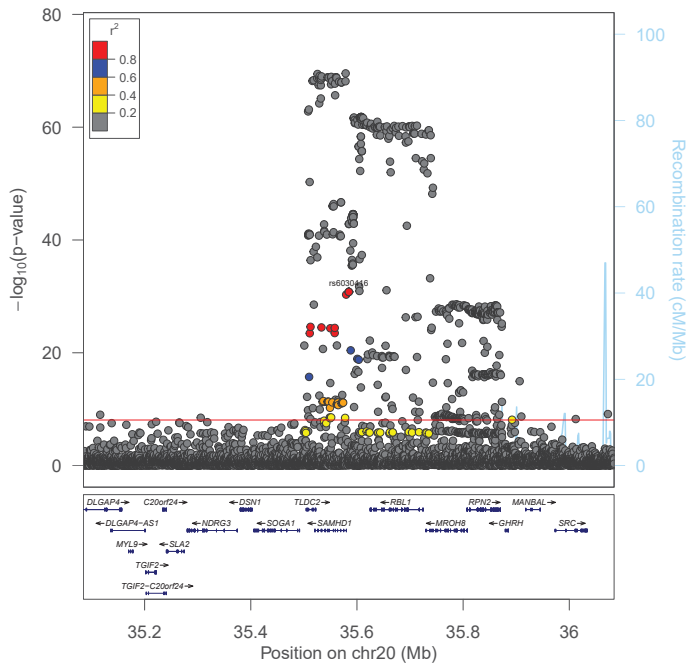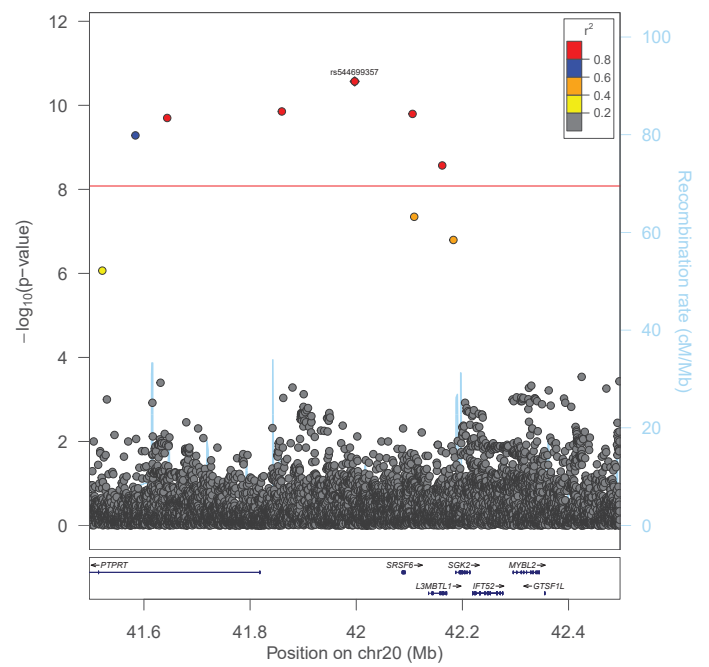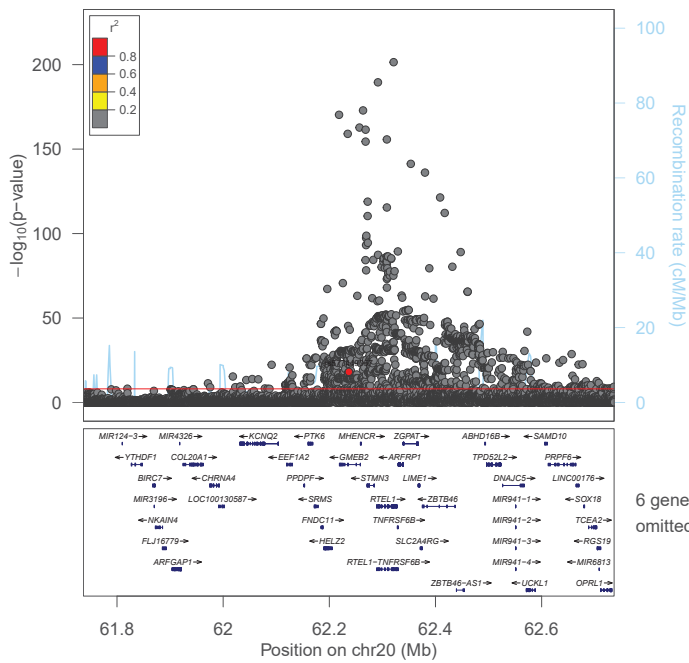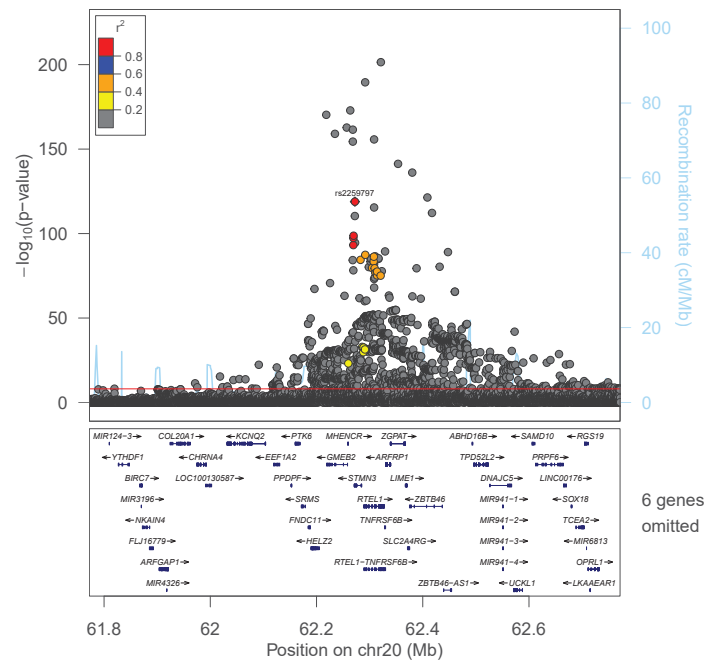

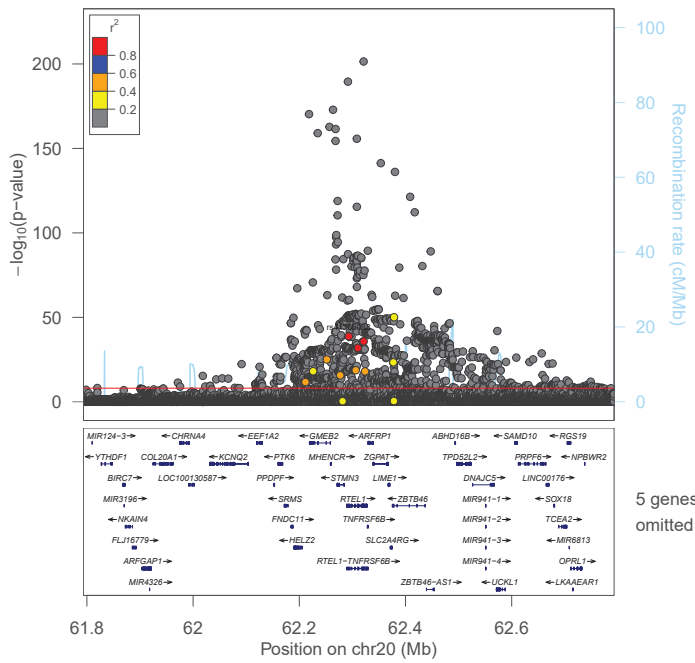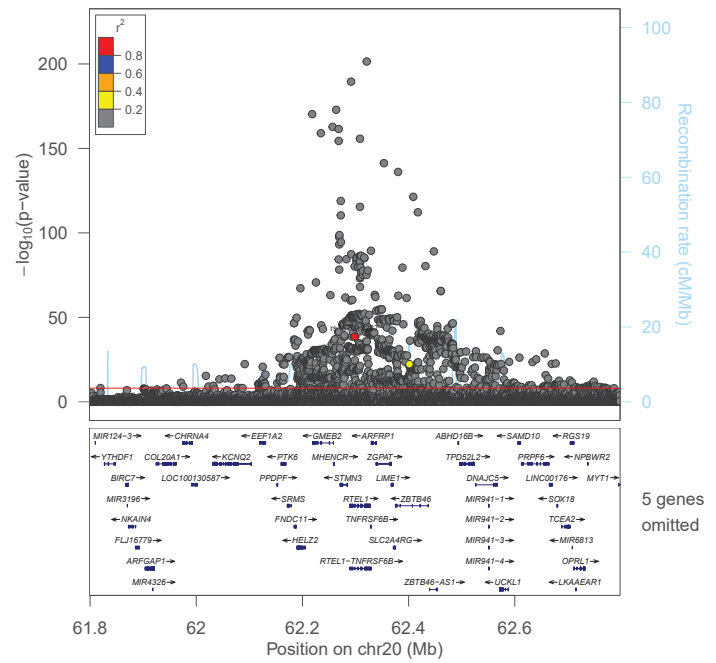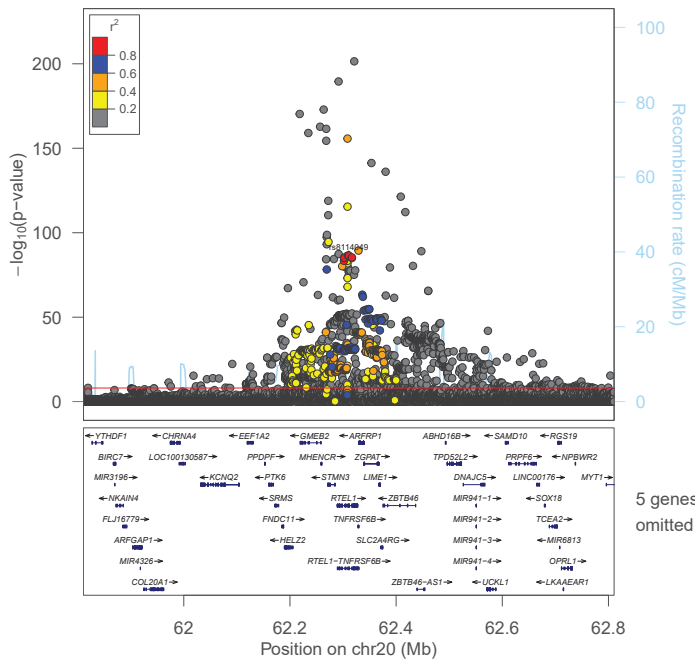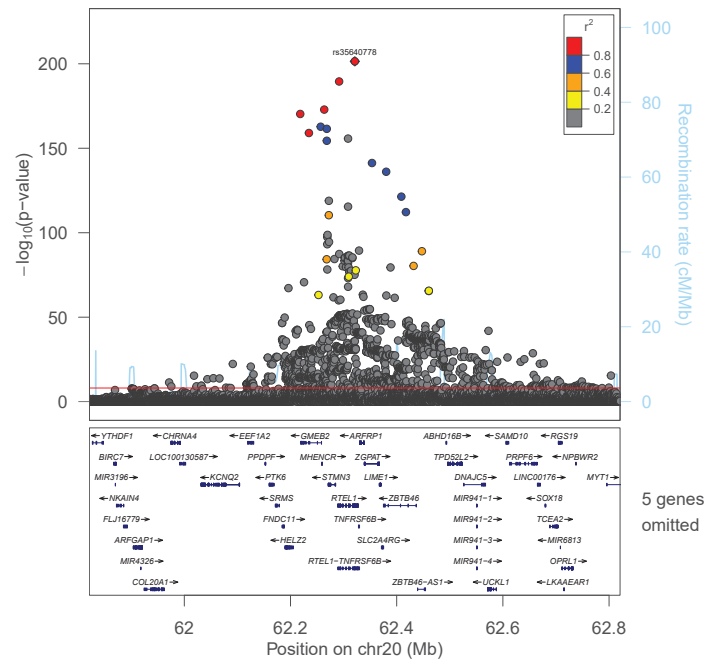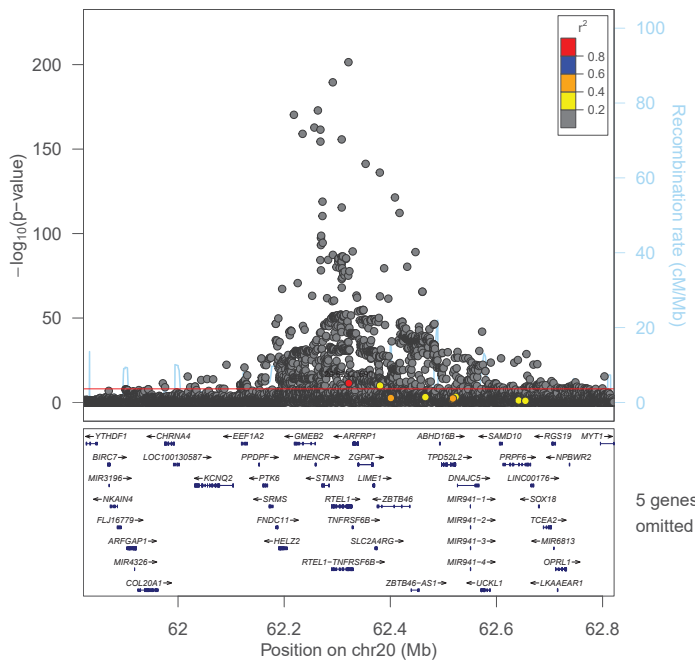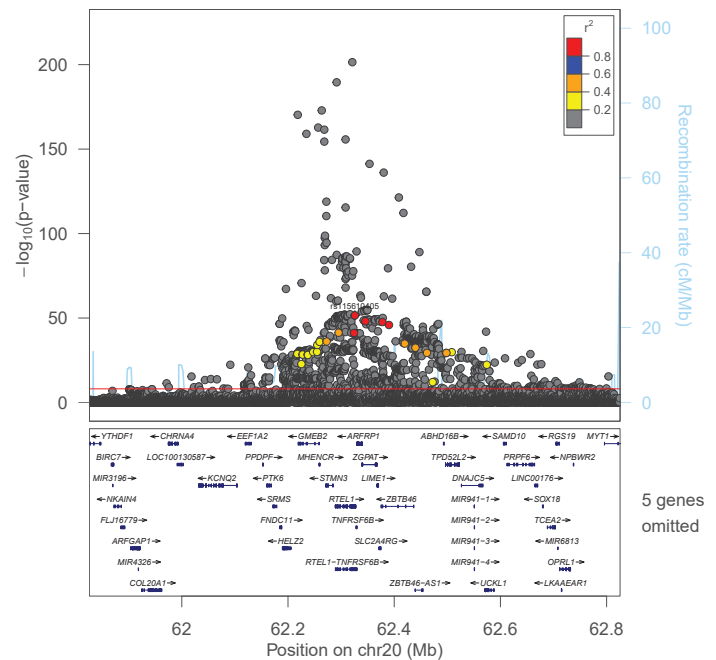

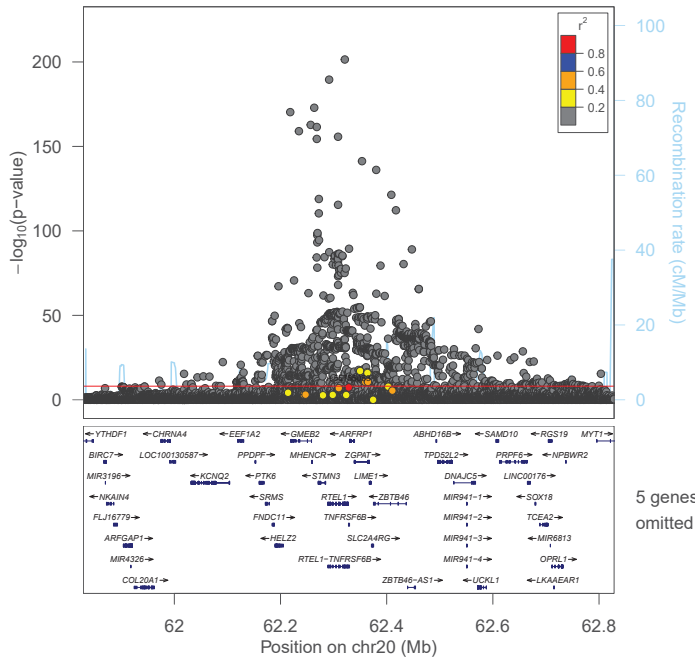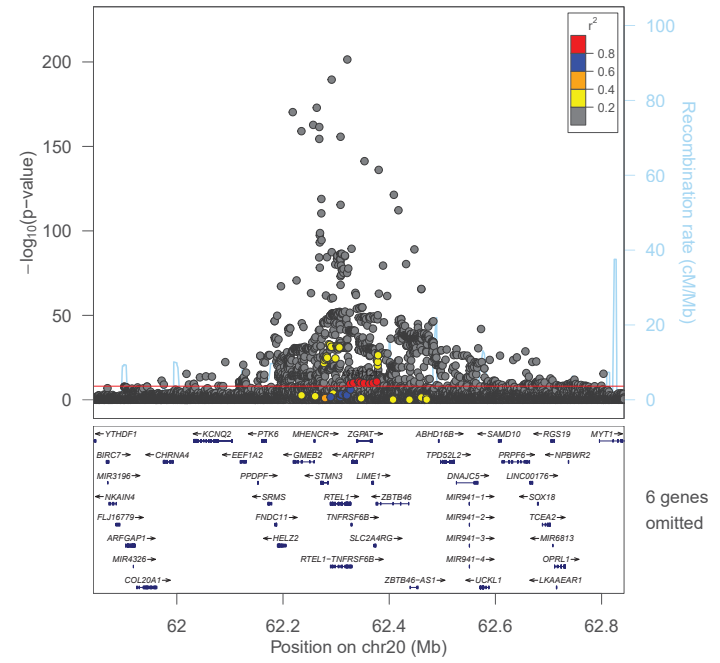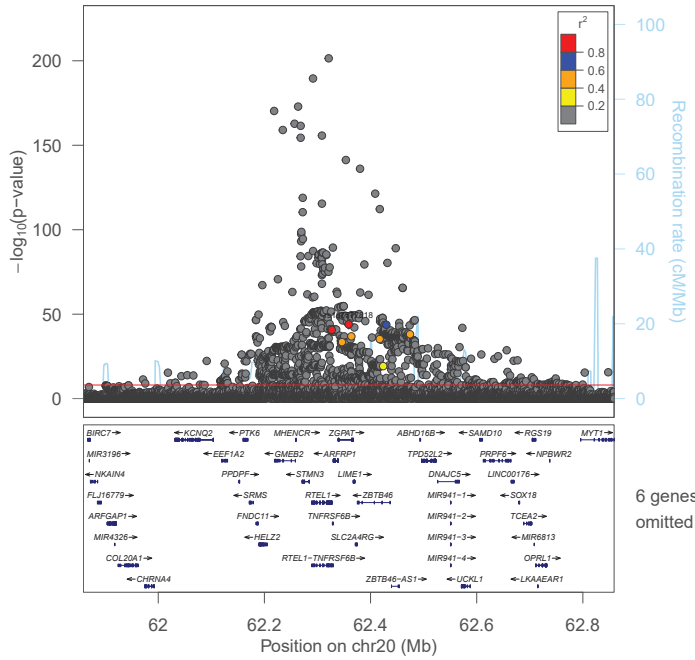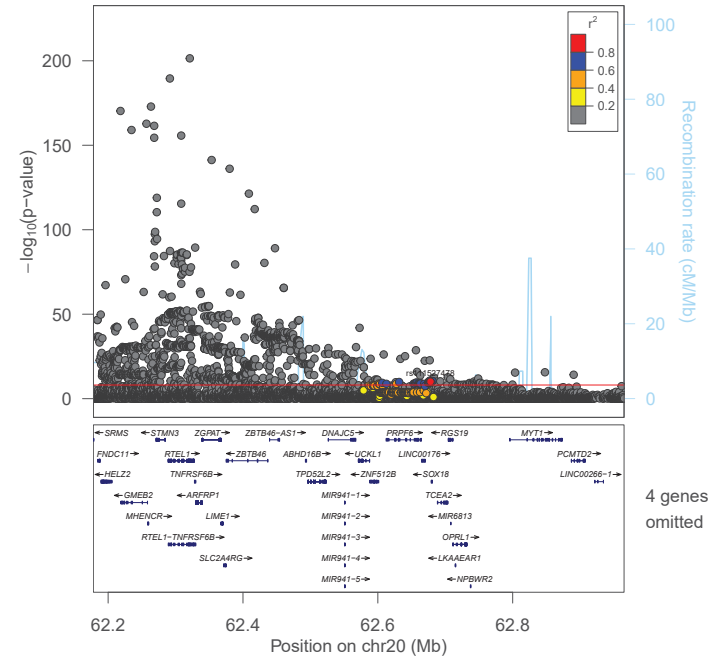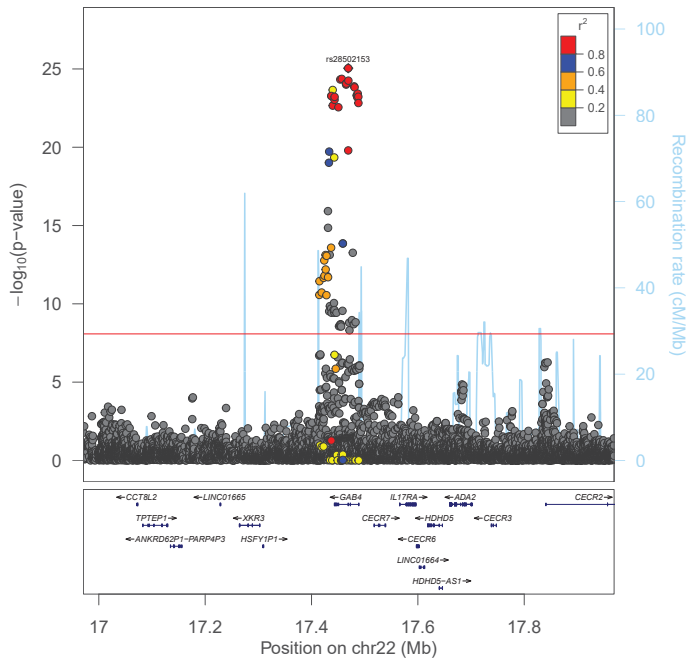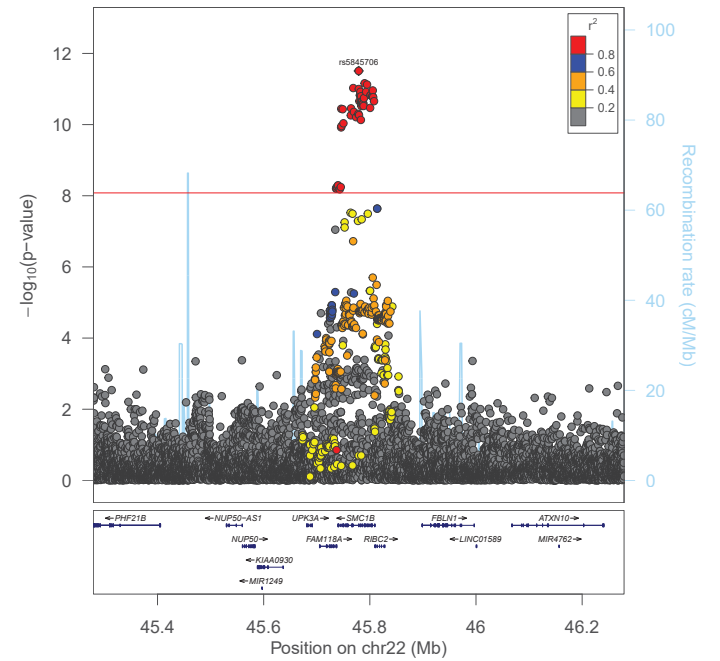



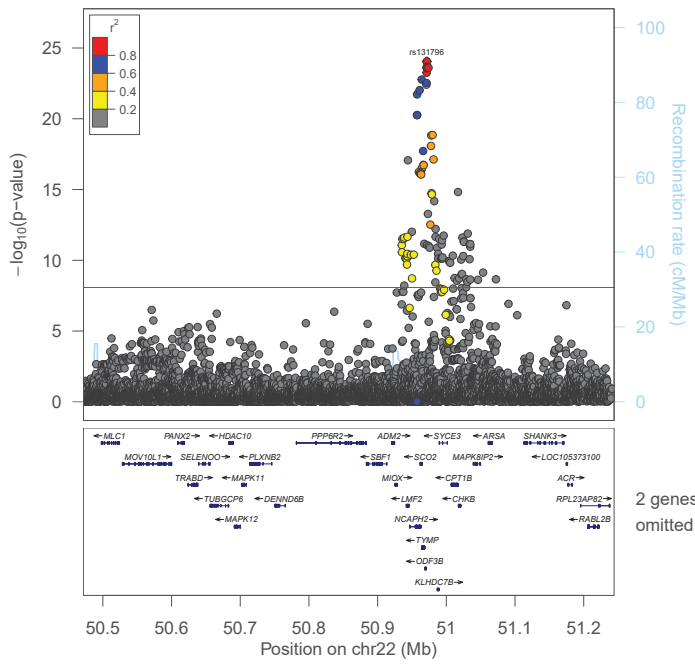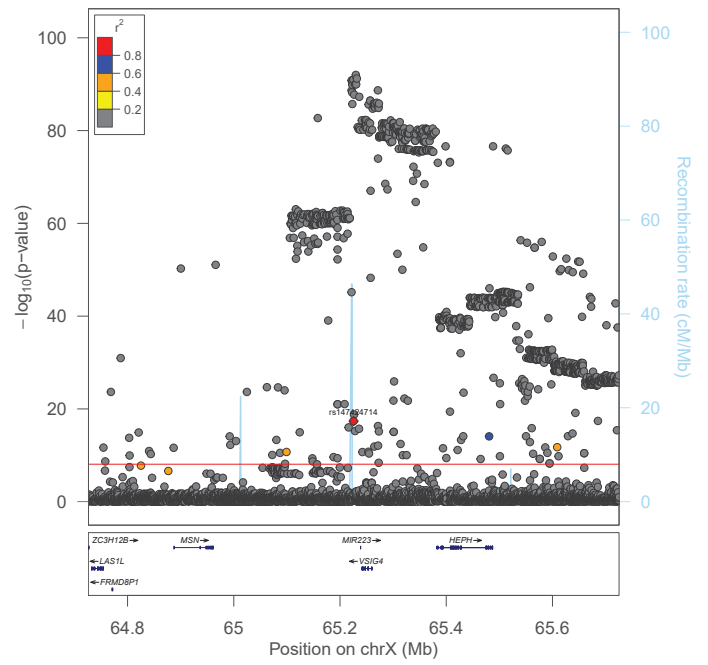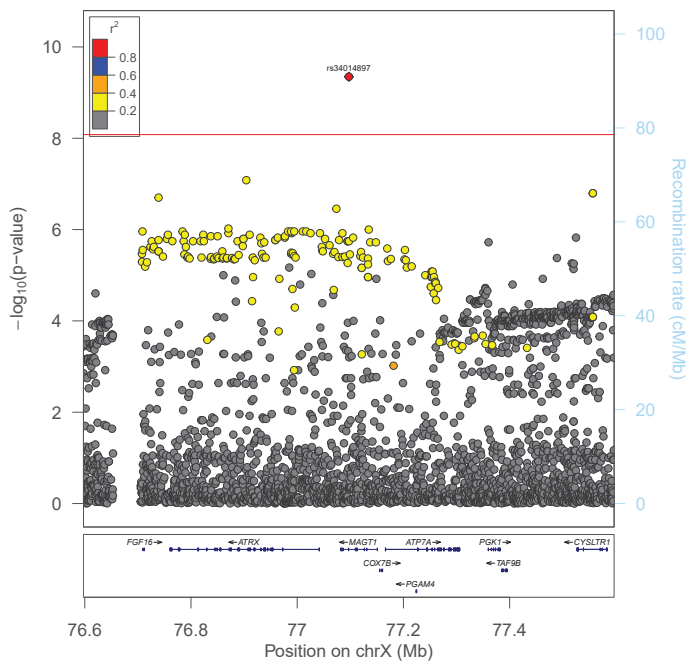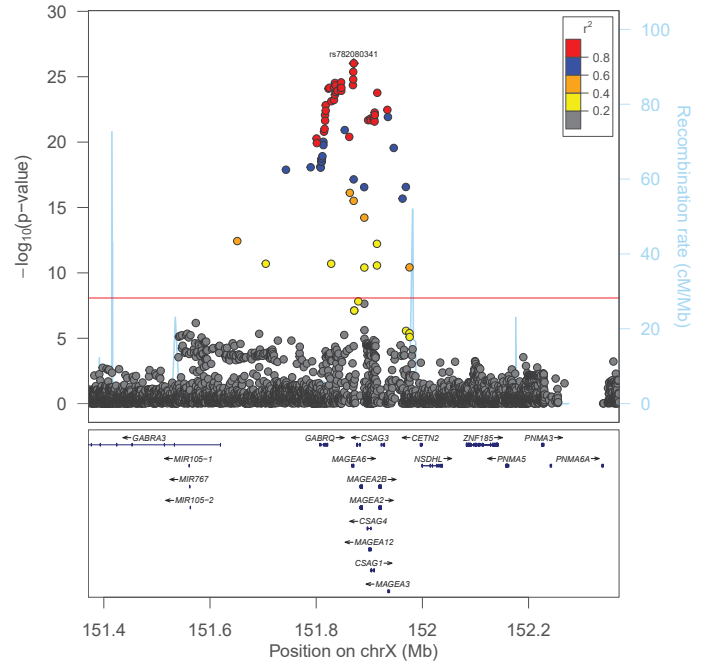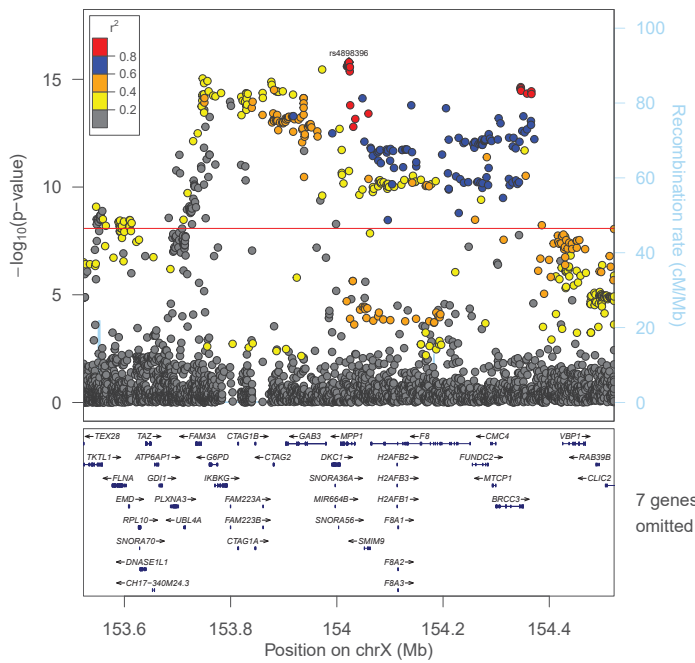

Supplement: 41588_2021_944_MOESM3_ESM.pdf [file 41588_2021_944_MOESM3_ESM.pdf]
